# Supplementary material for: Advances in the Characterization of Usnea barbata (L.) Weber ex F.H. Wigg from Călimani Mountains, Romania
Source: MDPI journal article supplement (doi:10.3390/app12094234), 2022-04-22
Supplement: s1 [file s1]

### Ag 107 - Calibration

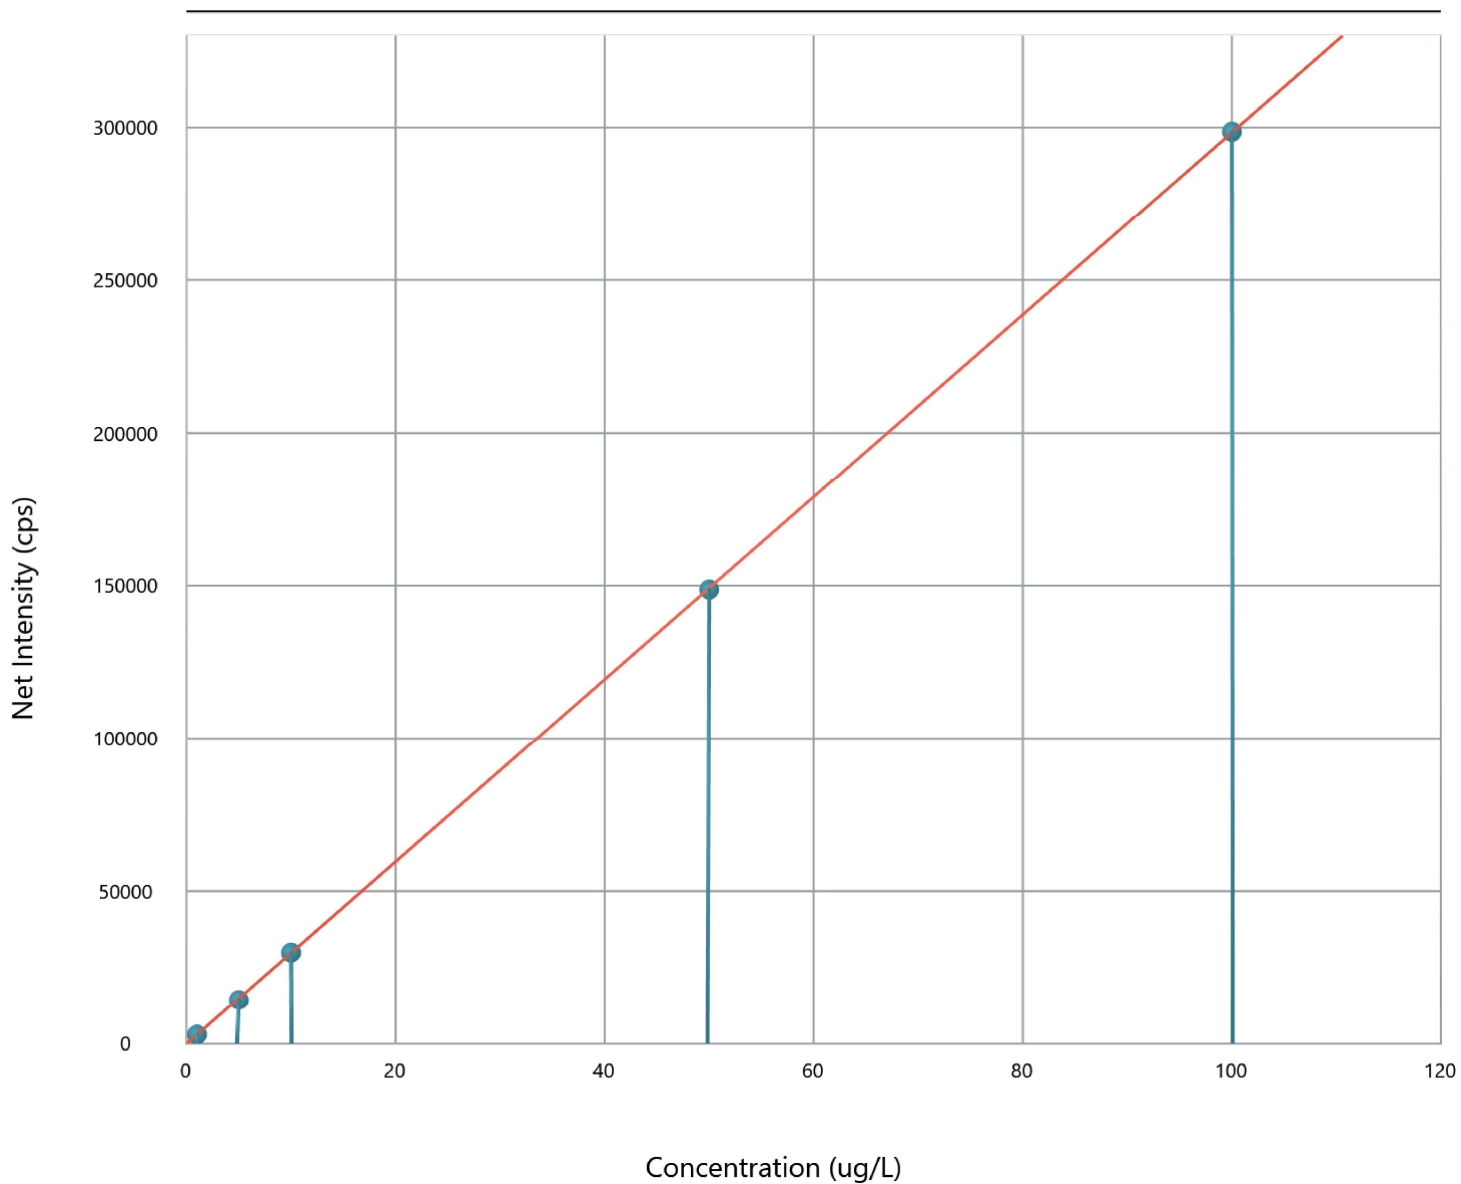

#### Statistics

Eqn. :  $y = 2984x + 0$   
 Cor.Coeff. : 0.999997  
 BEC : 0.069488 ug/L  
 DL : 0.035921 ug/L

#### Calibration Table

|            | Net Intensity<br>Ag 107 (cps) | Apparent Conc.<br>Ag 107 (ug/L) |
|------------|-------------------------------|---------------------------------|
| Blank      | 207.3                         |                                 |
| Cal. Std.1 | 2979.0                        | 0.998                           |
| Cal. Std.2 | 14422.8                       | 4.834                           |
| Cal. Std.3 | 29962.2                       | 10.042                          |
| Cal. Std.4 | 148698.0                      | 49.836                          |
| Cal. Std.5 | 298633.6                      | 100.086                         |

Al 27 - Calibration

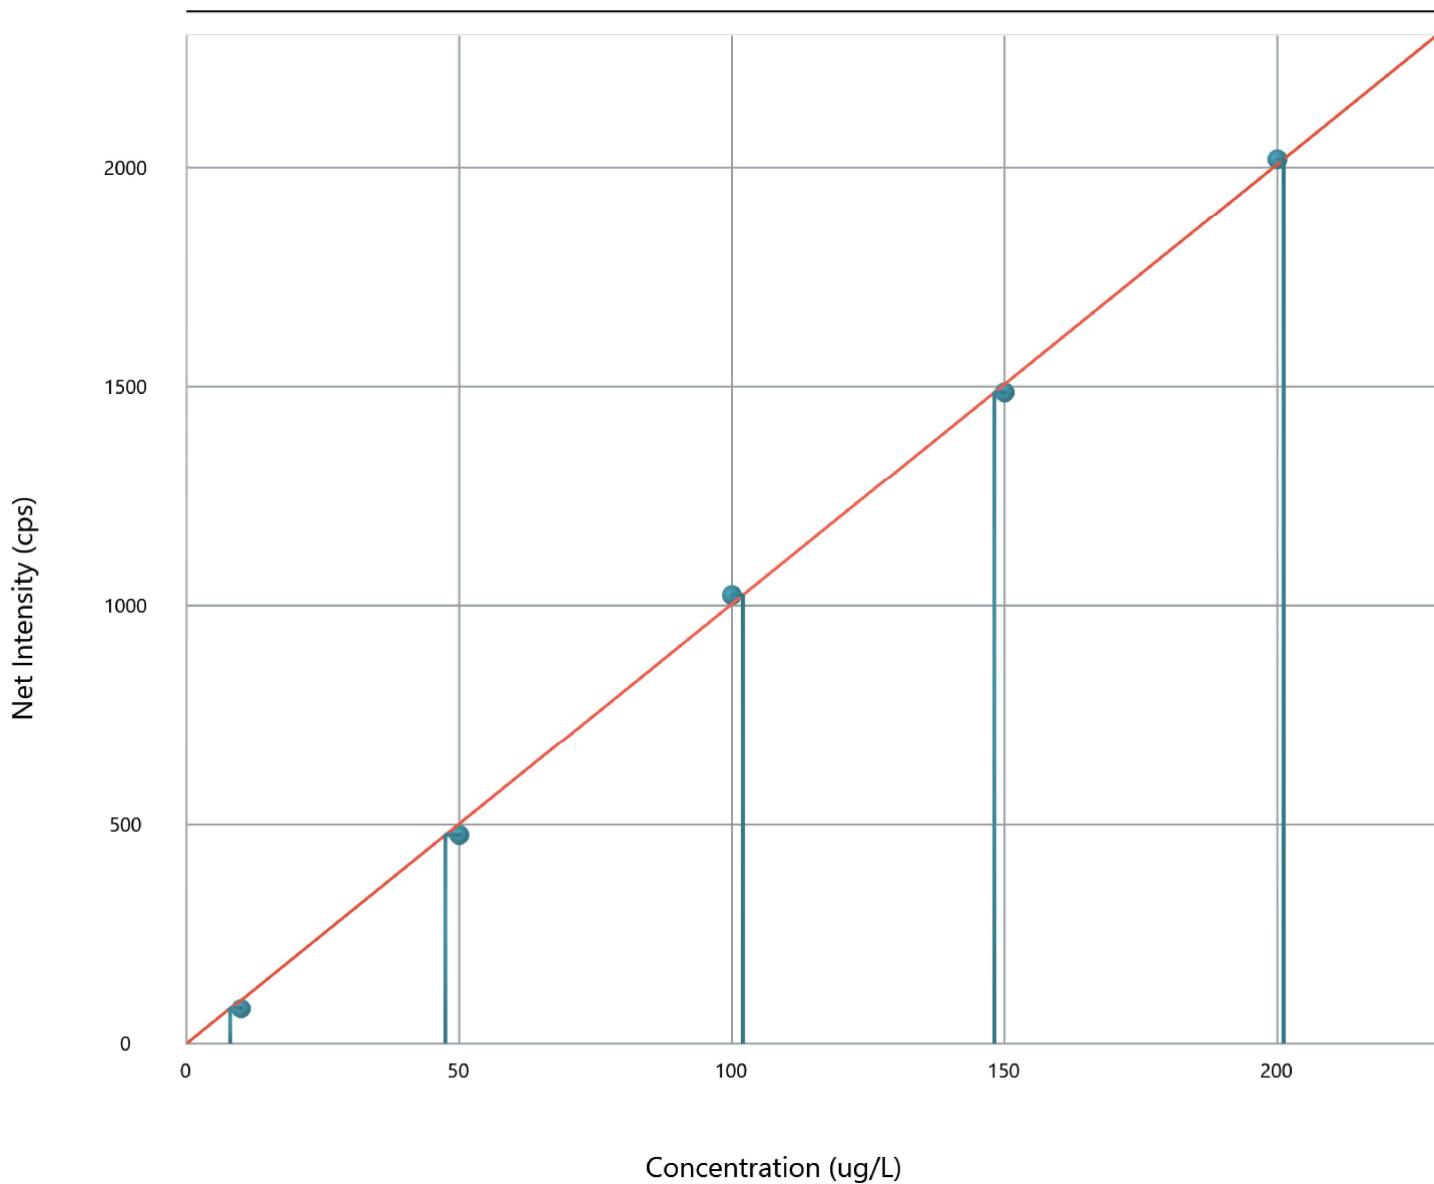

### Statistics

Eqn. :  $y = 10x + 0$   
 Cor.Coeff. : 0.999872  
 BEC : 5.845140 ug/L  
 DL : 1.646212 ug/L

### Calibration Table

|            | Net Intensity<br>Al 27 (cps) | Apparent Conc.<br>Al 27 (ug/L) |
|------------|------------------------------|--------------------------------|
| Blank      | 58.7                         |                                |
| Cal. Std.1 | 80.3                         | 8.004                          |
| Cal. Std.2 | 476.3                        | 47.459                         |
| Cal. Std.3 | 1023.7                       | 101.995                        |
| Cal. Std.4 | 1486.8                       | 148.129                        |
| Cal. Std.5 | 2018.8                       | 201.141                        |

As 75 - Calibration

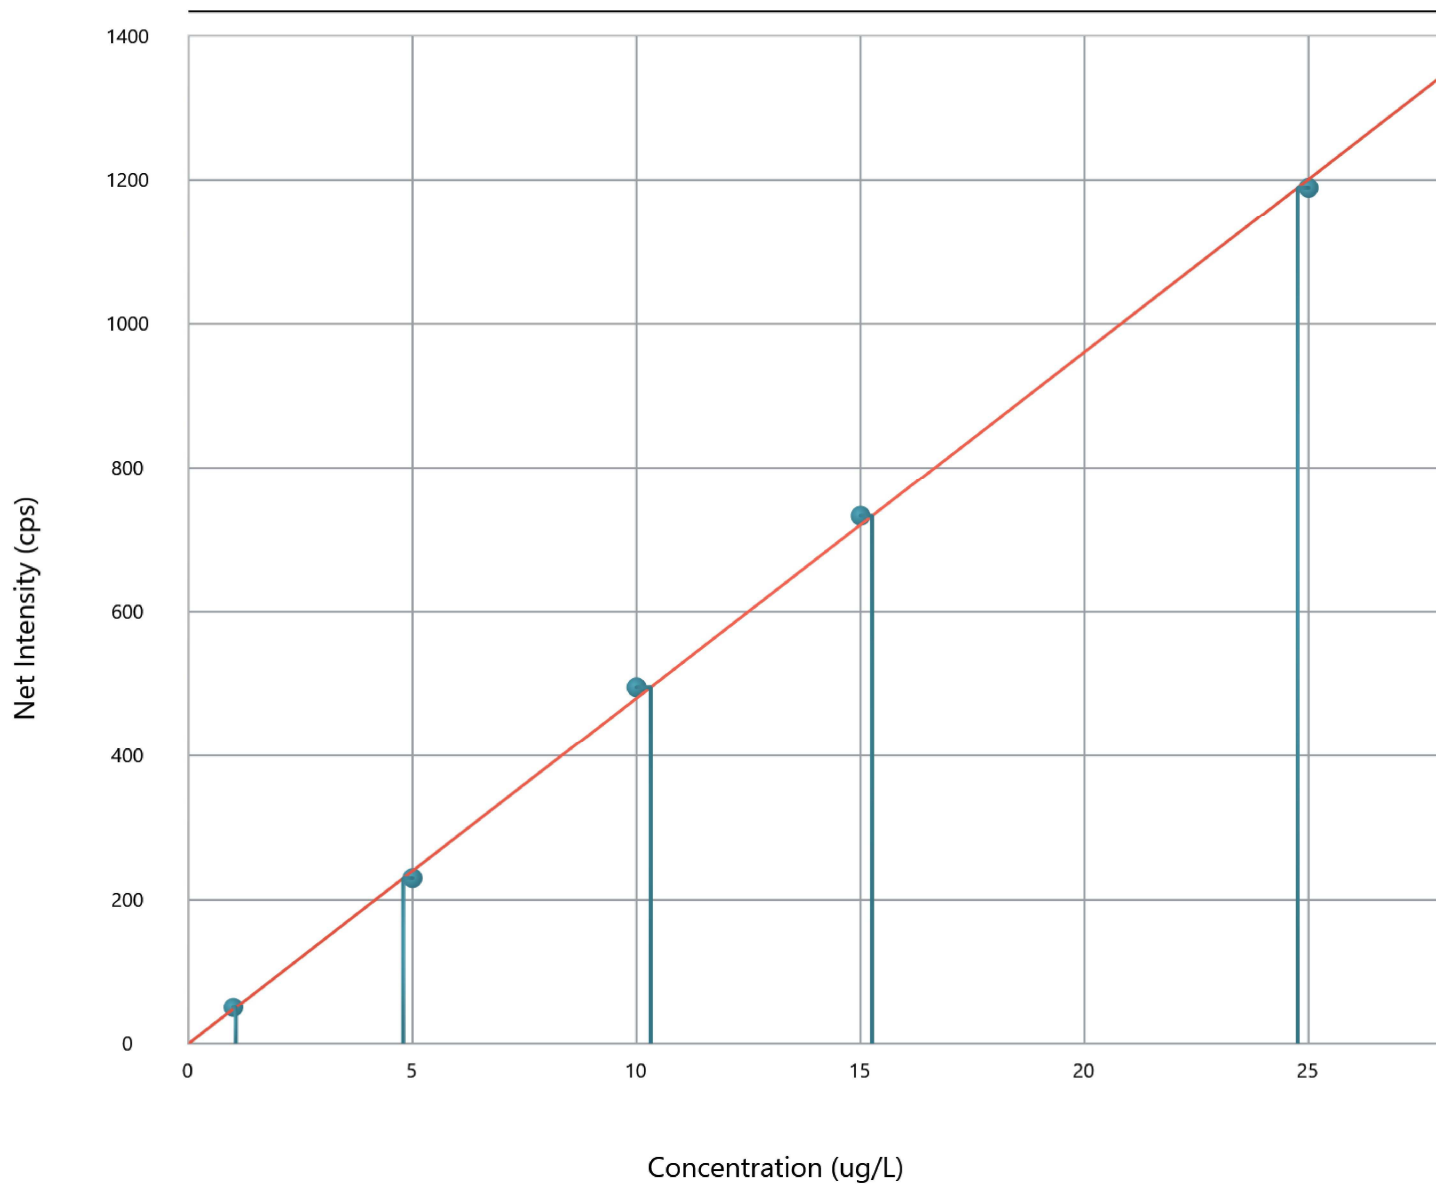

## Statistics

Eqn. :  $y = 48x + 0$   
 Cor.Coeff. : 0.999861  
 BEC : 0.152644 ug/L  
 DL : 0.036053 ug/L

## Calibration Table

|            | Net Intensity<br>As 75 (cps) | Apparent Conc.<br>As 75 (ug/L) |
|------------|------------------------------|--------------------------------|
| Blank      | 7.3                          |                                |
| Cal. Std.1 | 50.7                         | 1.055                          |
| Cal. Std.2 | 230.3                        | 4.794                          |
| Cal. Std.3 | 495.7                        | 10.318                         |
| Cal. Std.4 | 733.0                        | 15.258                         |
| Cal. Std.5 | 1189.4                       | 24.757                         |

Ba 138 - Calibration

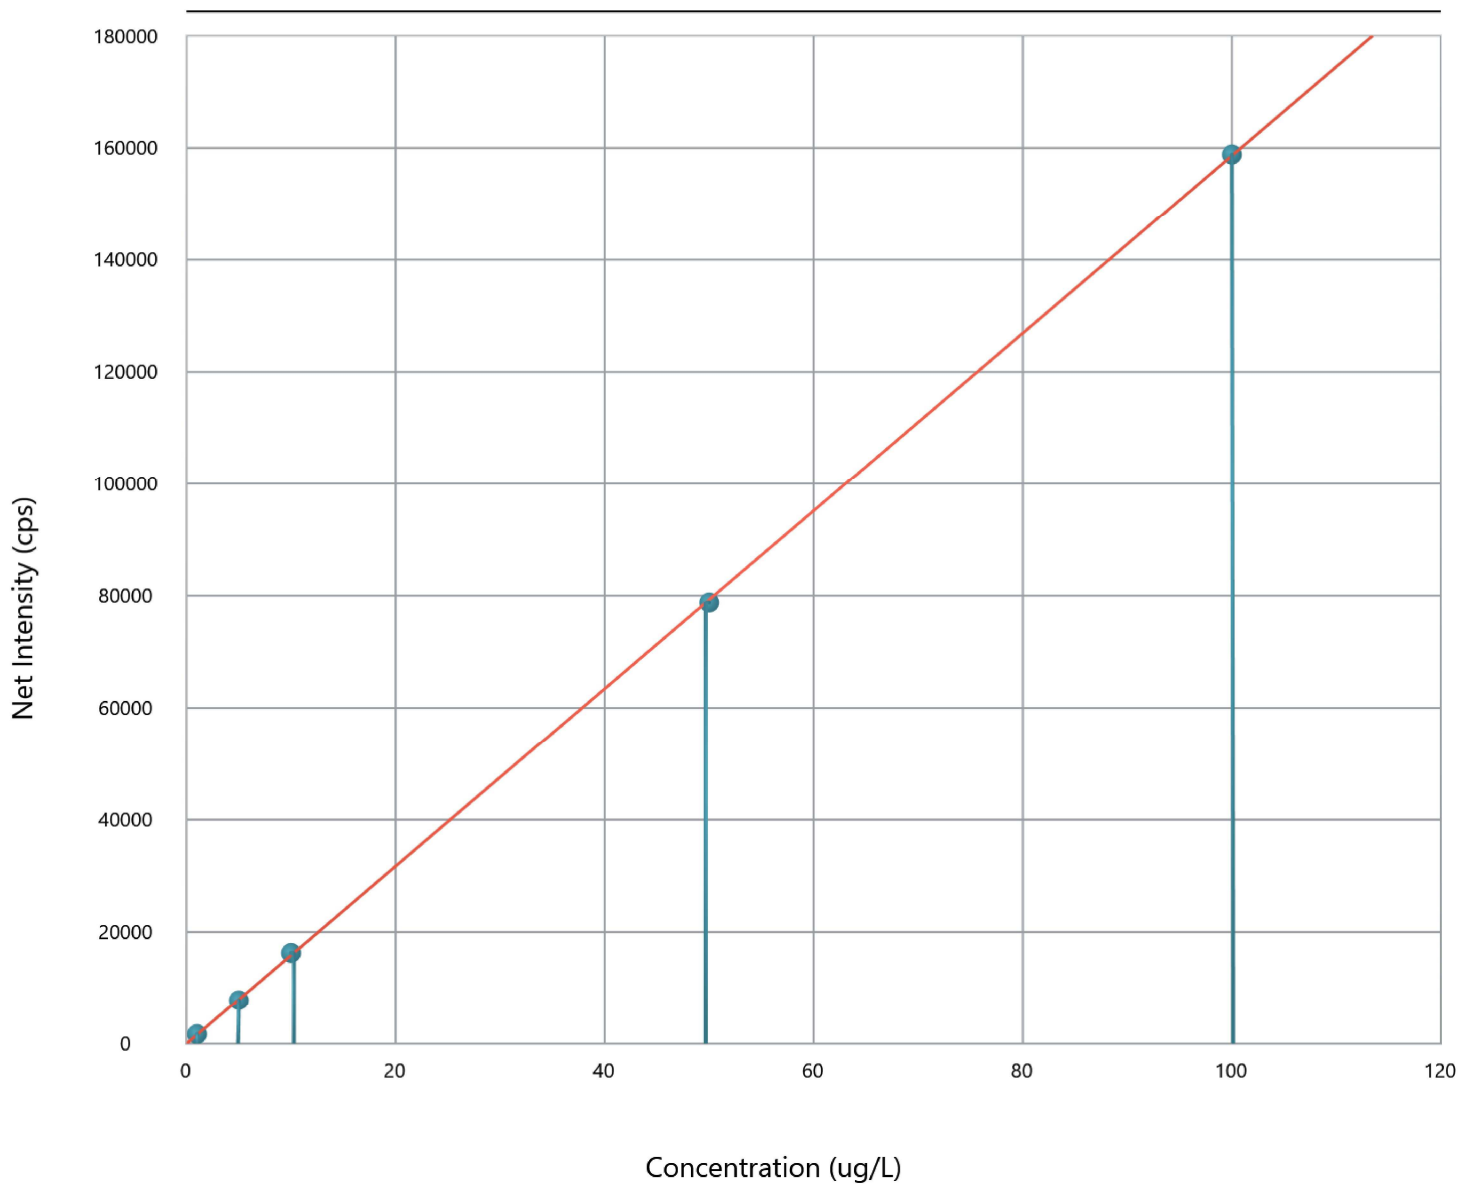

## Statistics

Eqn. :  $y = 1586x + 0$   
 Cor.Coeff. : 0.999992  
 BEC : 0.070481 ug/L  
 DL : 0.022877 ug/L

## Calibration Table

|            | Net Intensity<br>Ba 138 (cps) | Apparent Conc.<br>Ba 138 (ug/L) |
|------------|-------------------------------|---------------------------------|
| Blank      | 111.8                         |                                 |
| Cal. Std.1 | 1701.1                        | 1.072                           |
| Cal. Std.2 | 7814.3                        | 4.926                           |
| Cal. Std.3 | 16291.6                       | 10.270                          |
| Cal. Std.4 | 78805.6                       | 49.680                          |
| Cal. Std.5 | 158843.2                      | 100.136                         |



Ca 43 - Calibration

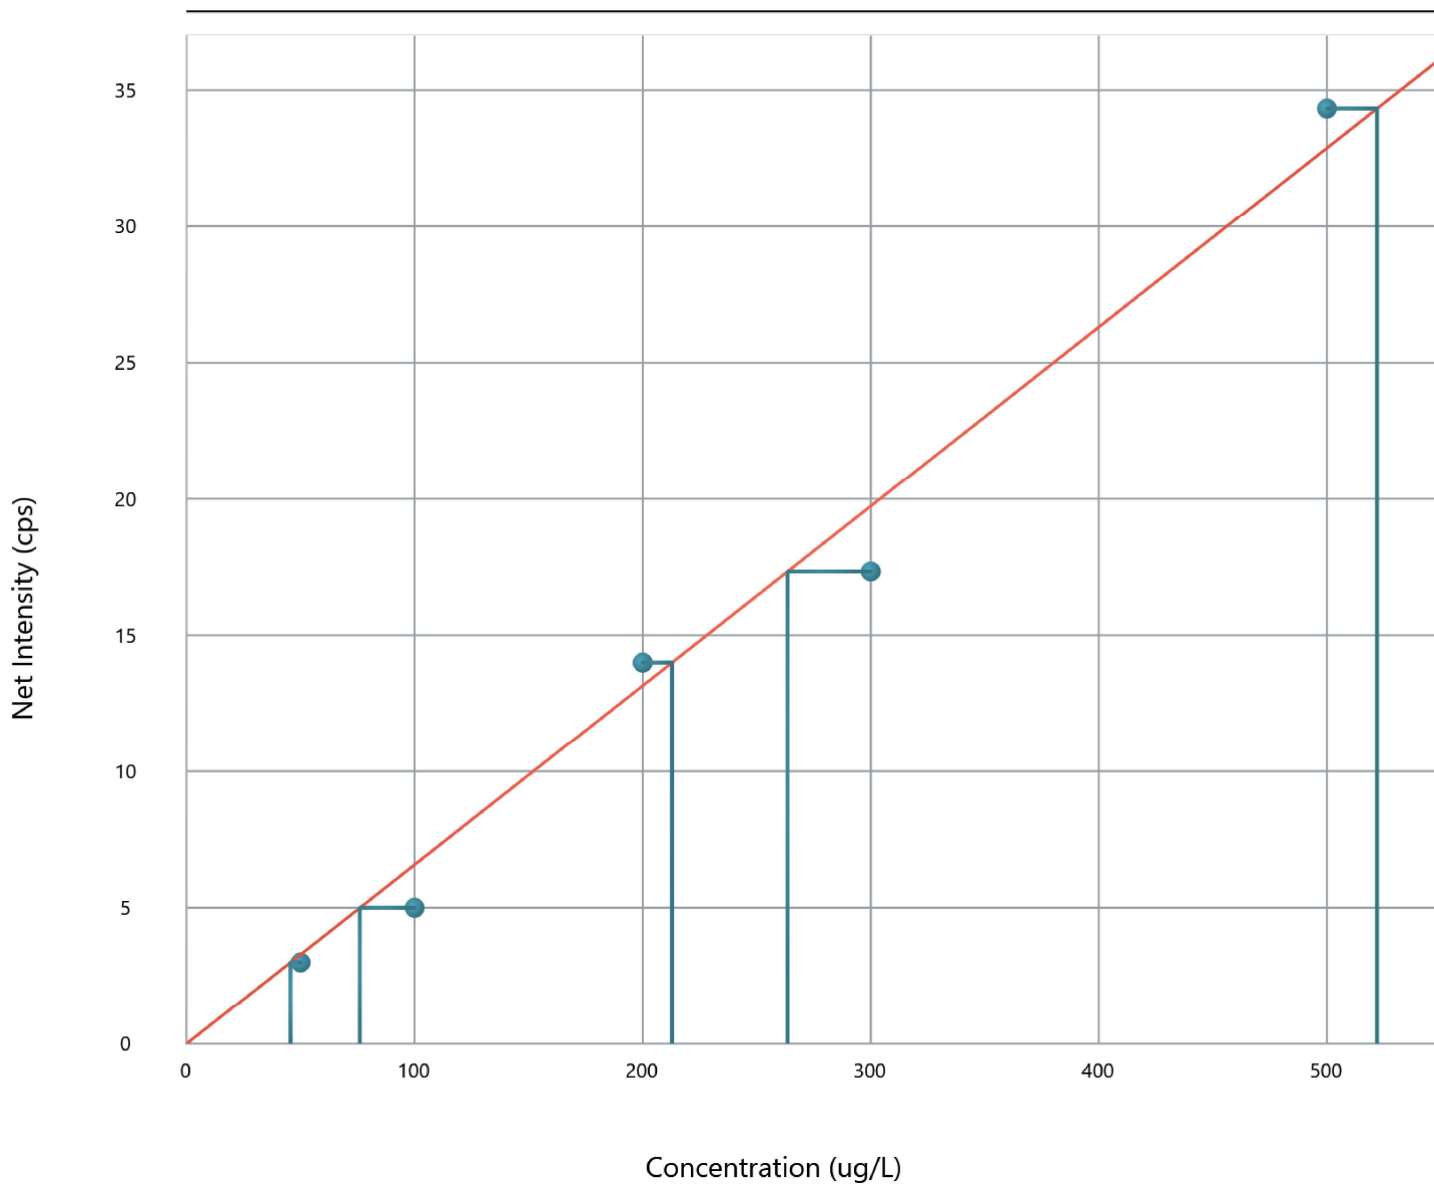

## Statistics

Eqn. :  $y = 0x + 0$   
 Cor.Coeff. : 0.996738  
 BEC : 50.677799 ug/L  
 DL : 94.944832 ug/L

## Calibration Table

|            | Net Intensity<br>Ca 43 (cps) | Apparent Conc.<br>Ca 43 (ug/L) |
|------------|------------------------------|--------------------------------|
| Blank      | 3.3                          |                                |
| Cal. Std.1 | 3.0                          | 45.610                         |
| Cal. Std.2 | 5.0                          | 76.017                         |
| Cal. Std.3 | 14.0                         | 212.847                        |
| Cal. Std.4 | 17.3                         | 263.525                        |
| Cal. Std.5 | 34.3                         | 521.982                        |

Cd 111 - Calibration

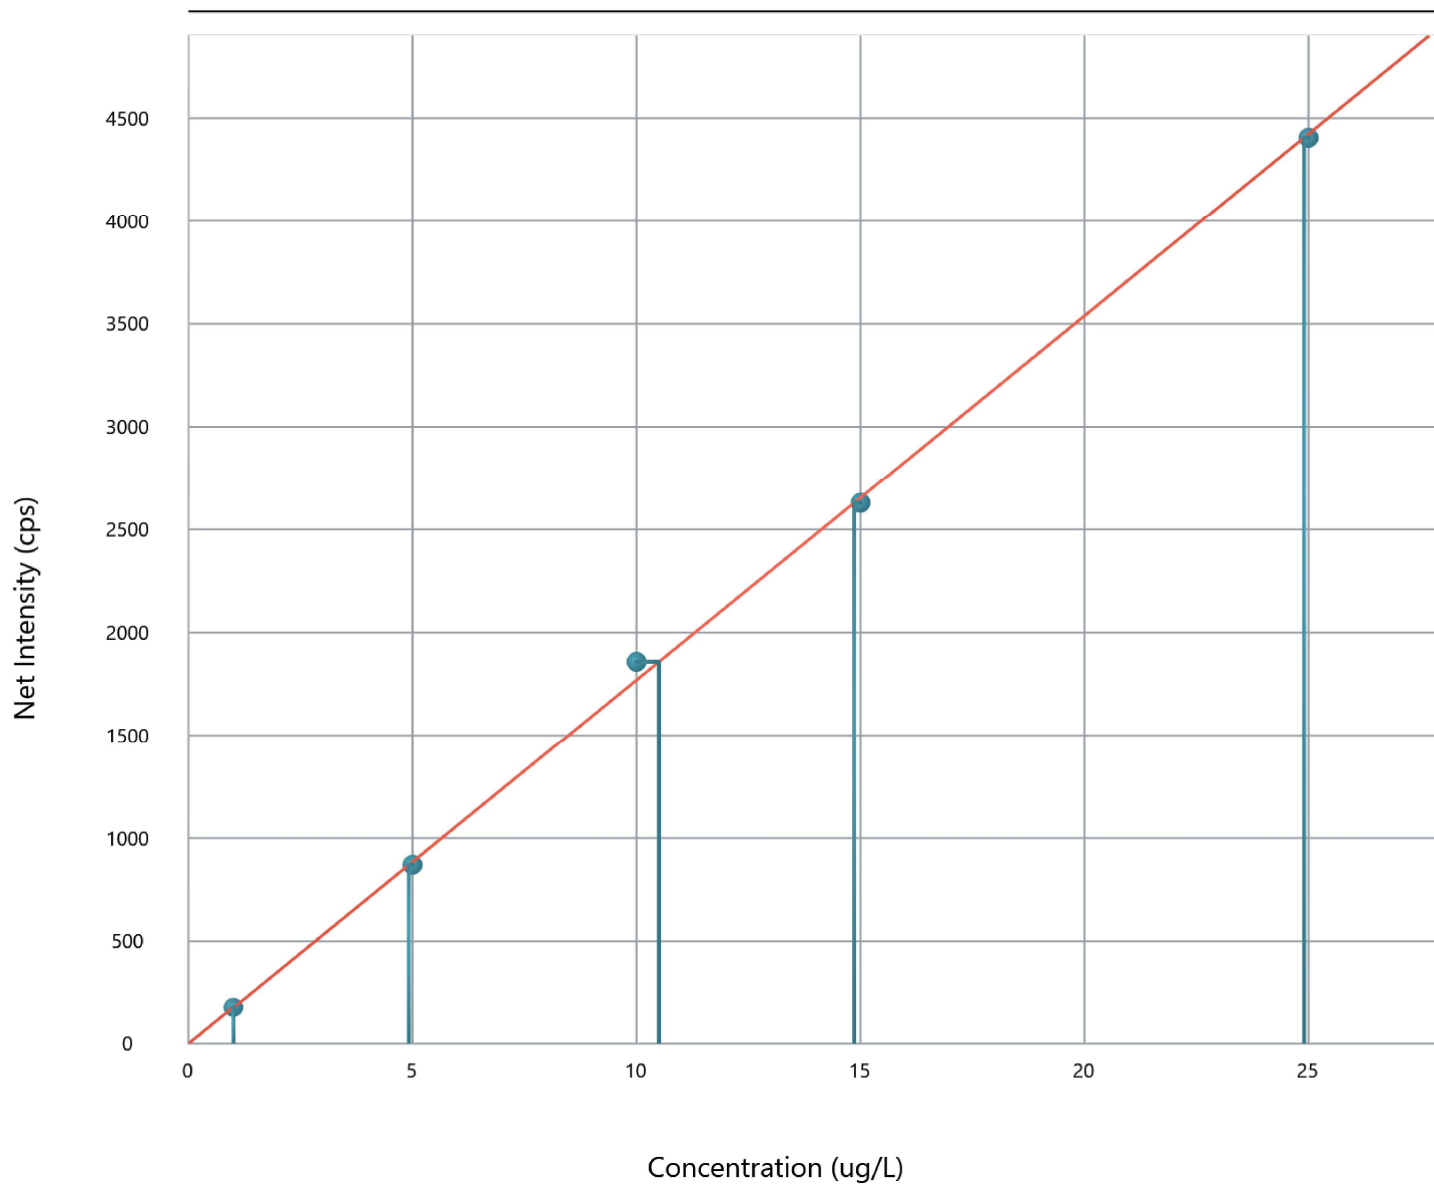

## Statistics

Eqn. :  $y = 177x + 0$   
 Cor.Coeff. : 0.999853  
 BEC : 0.060285 ug/L  
 DL : 0.087007 ug/L

## Calibration Table

|            | Net Intensity<br>Cd 111 (cps) | Apparent Conc.<br>Cd 111 (ug/L) |
|------------|-------------------------------|---------------------------------|
| Blank      | 10.7                          |                                 |
| Cal. Std.1 | 177.7                         | 1.004                           |
| Cal. Std.2 | 870.4                         | 4.919                           |
| Cal. Std.3 | 1858.1                        | 10.502                          |
| Cal. Std.4 | 2629.2                        | 14.860                          |
| Cal. Std.5 | 4405.7                        | 24.900                          |

Co 59 - Calibration

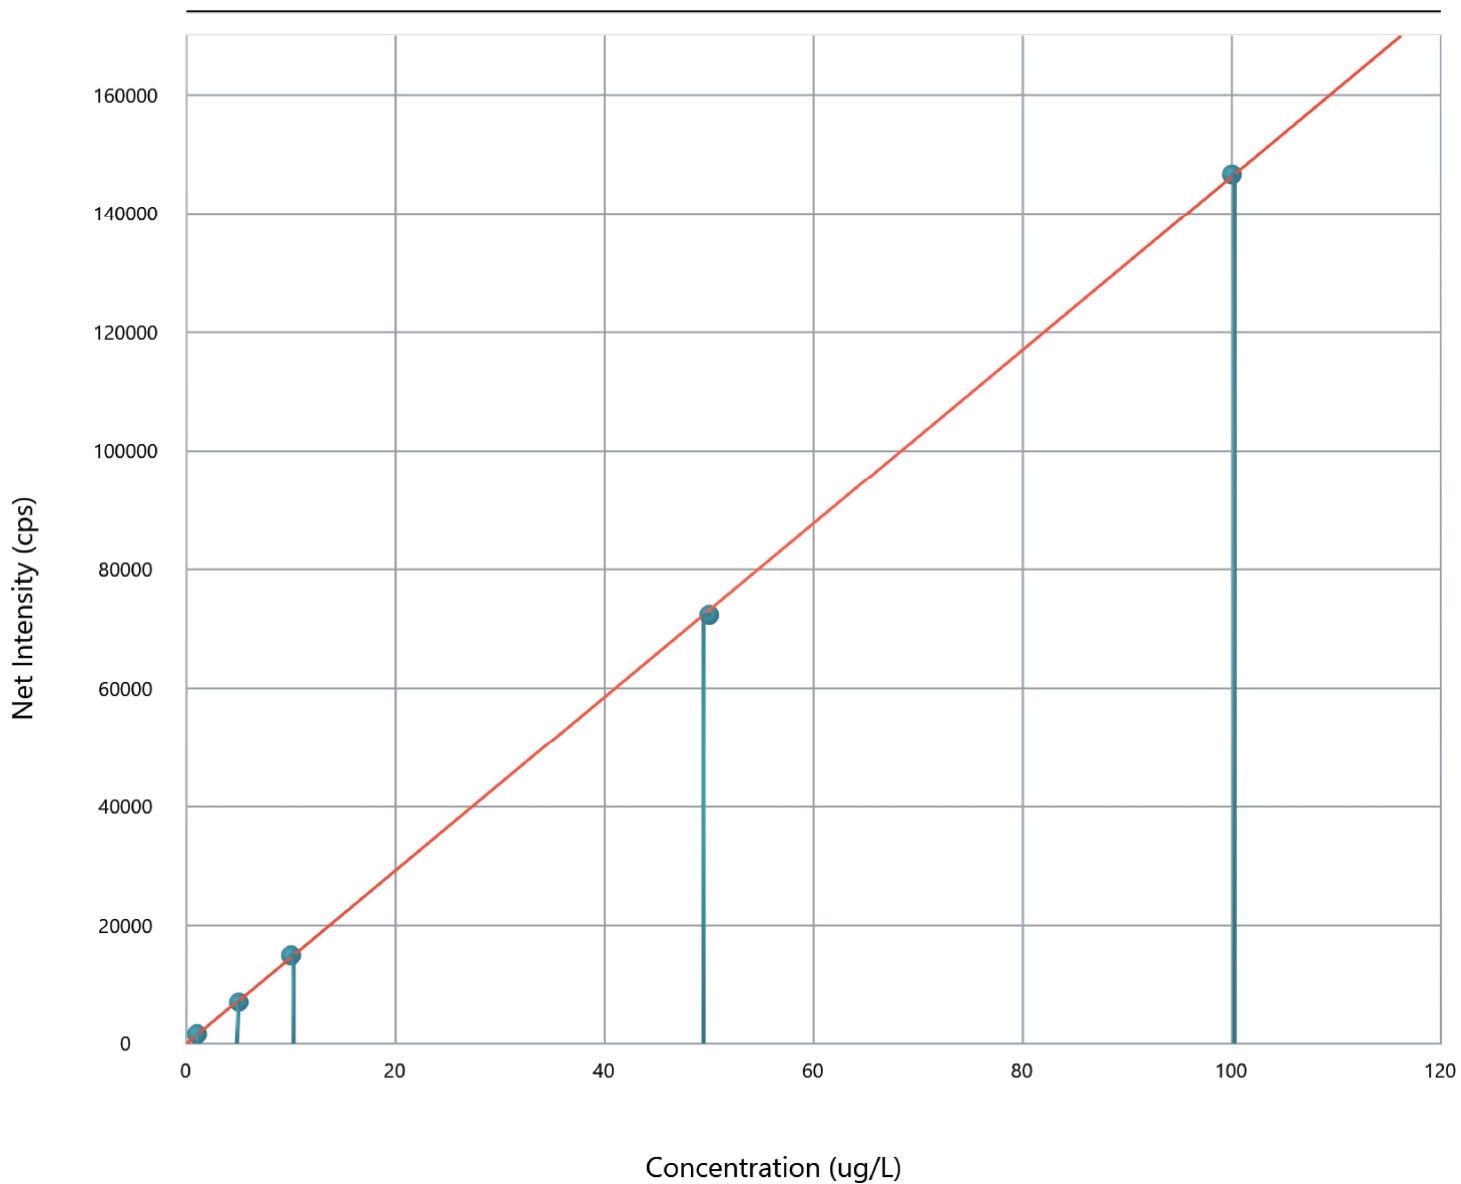**Statistics**

Eqn. :  $y = 1463x + 0$   
Cor.Coeff. : 0.999982  
BEC : 0.018683 ug/L  
DL : 0.002368 ug/L

**Calibration Table**

|            | Net Intensity<br>Co 59 (cps) | Apparent Conc.<br>Co 59 (ug/L) |
|------------|------------------------------|--------------------------------|
| Blank      | 27.3                         |                                |
| Cal. Std.1 | 1592.8                       | 1.089                          |
| Cal. Std.2 | 7054.1                       | 4.822                          |
| Cal. Std.3 | 14991.6                      | 10.247                         |
| Cal. Std.4 | 72353.2                      | 49.456                         |
| Cal. Std.5 | 146673.2                     | 100.256                        |

Cr 52 - Calibration

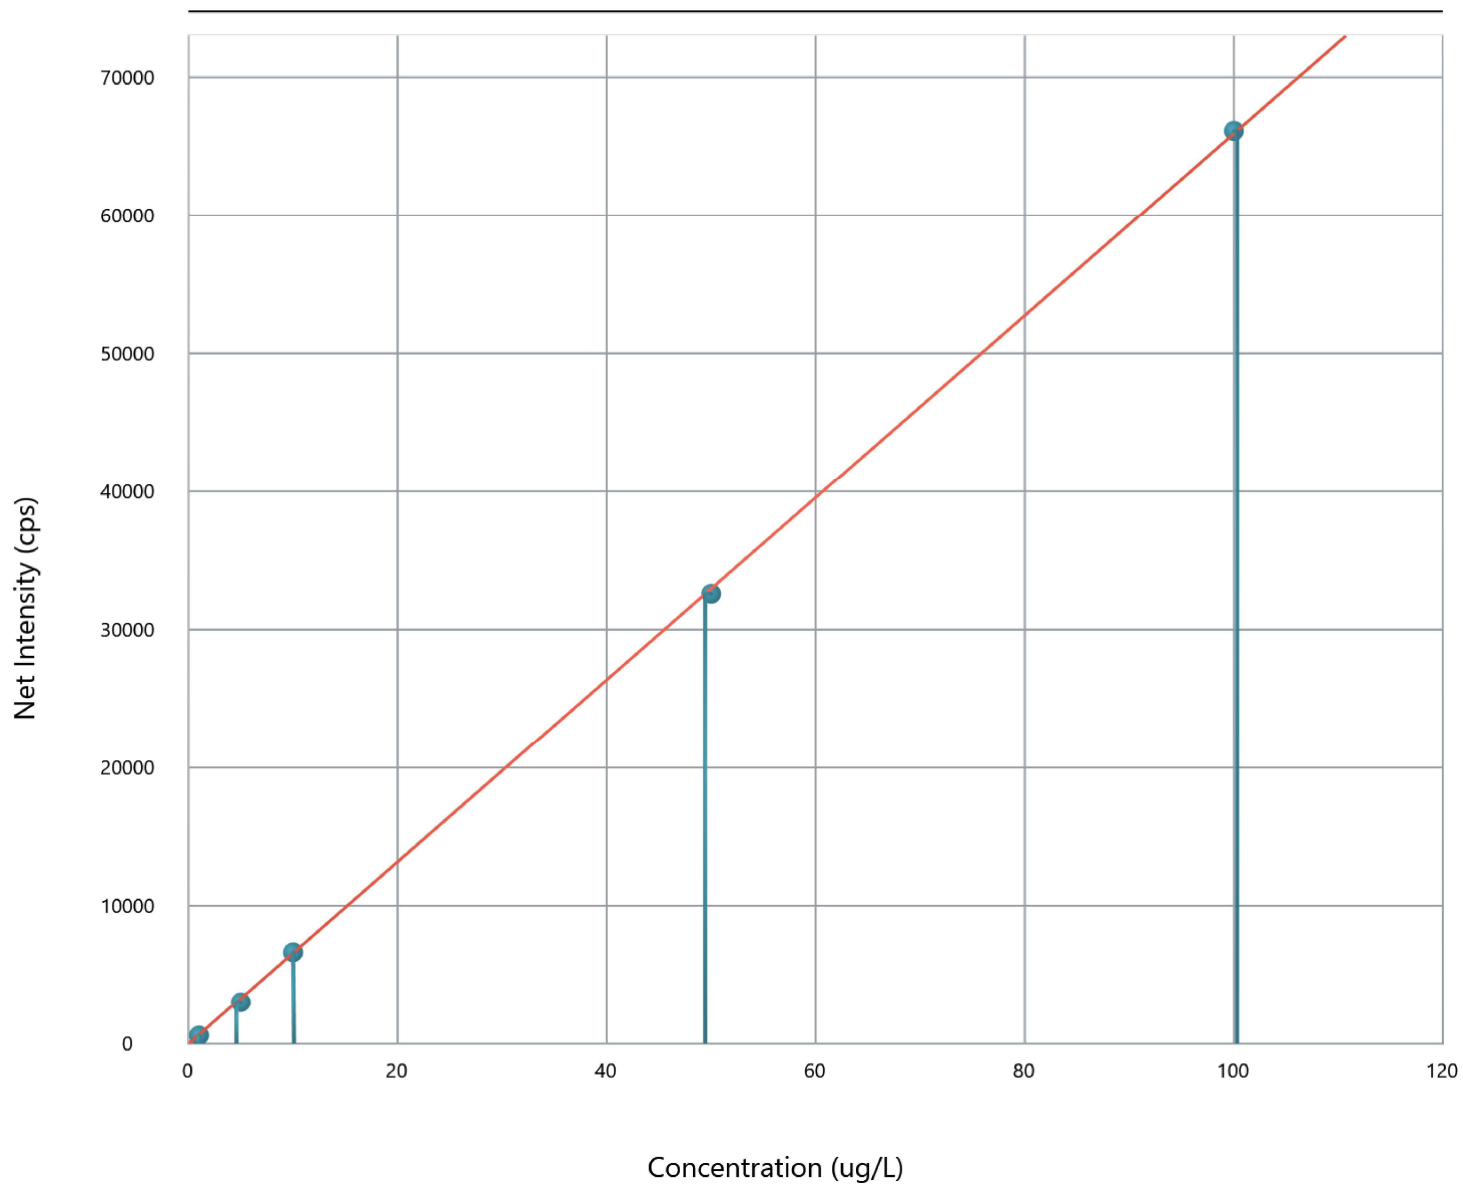**Statistics**

Eqn. :  $y = 659x + 0$   
Cor.Coeff. : 0.999976  
BEC : 0.387793 ug/L  
DL : 0.027429 ug/L

**Calibration Table**

|            | Net Intensity<br>Cr 52 (cps) | Apparent Conc.<br>Cr 52 (ug/L) |
|------------|------------------------------|--------------------------------|
| Blank      | 255.7                        |                                |
| Cal. Std.1 | 597.4                        | 0.906                          |
| Cal. Std.2 | 3018.7                       | 4.579                          |
| Cal. Std.3 | 6649.7                       | 10.086                         |
| Cal. Std.4 | 32588.7                      | 49.430                         |
| Cal. Std.5 | 66126.0                      | 100.298                        |

Cu 63 - Calibration

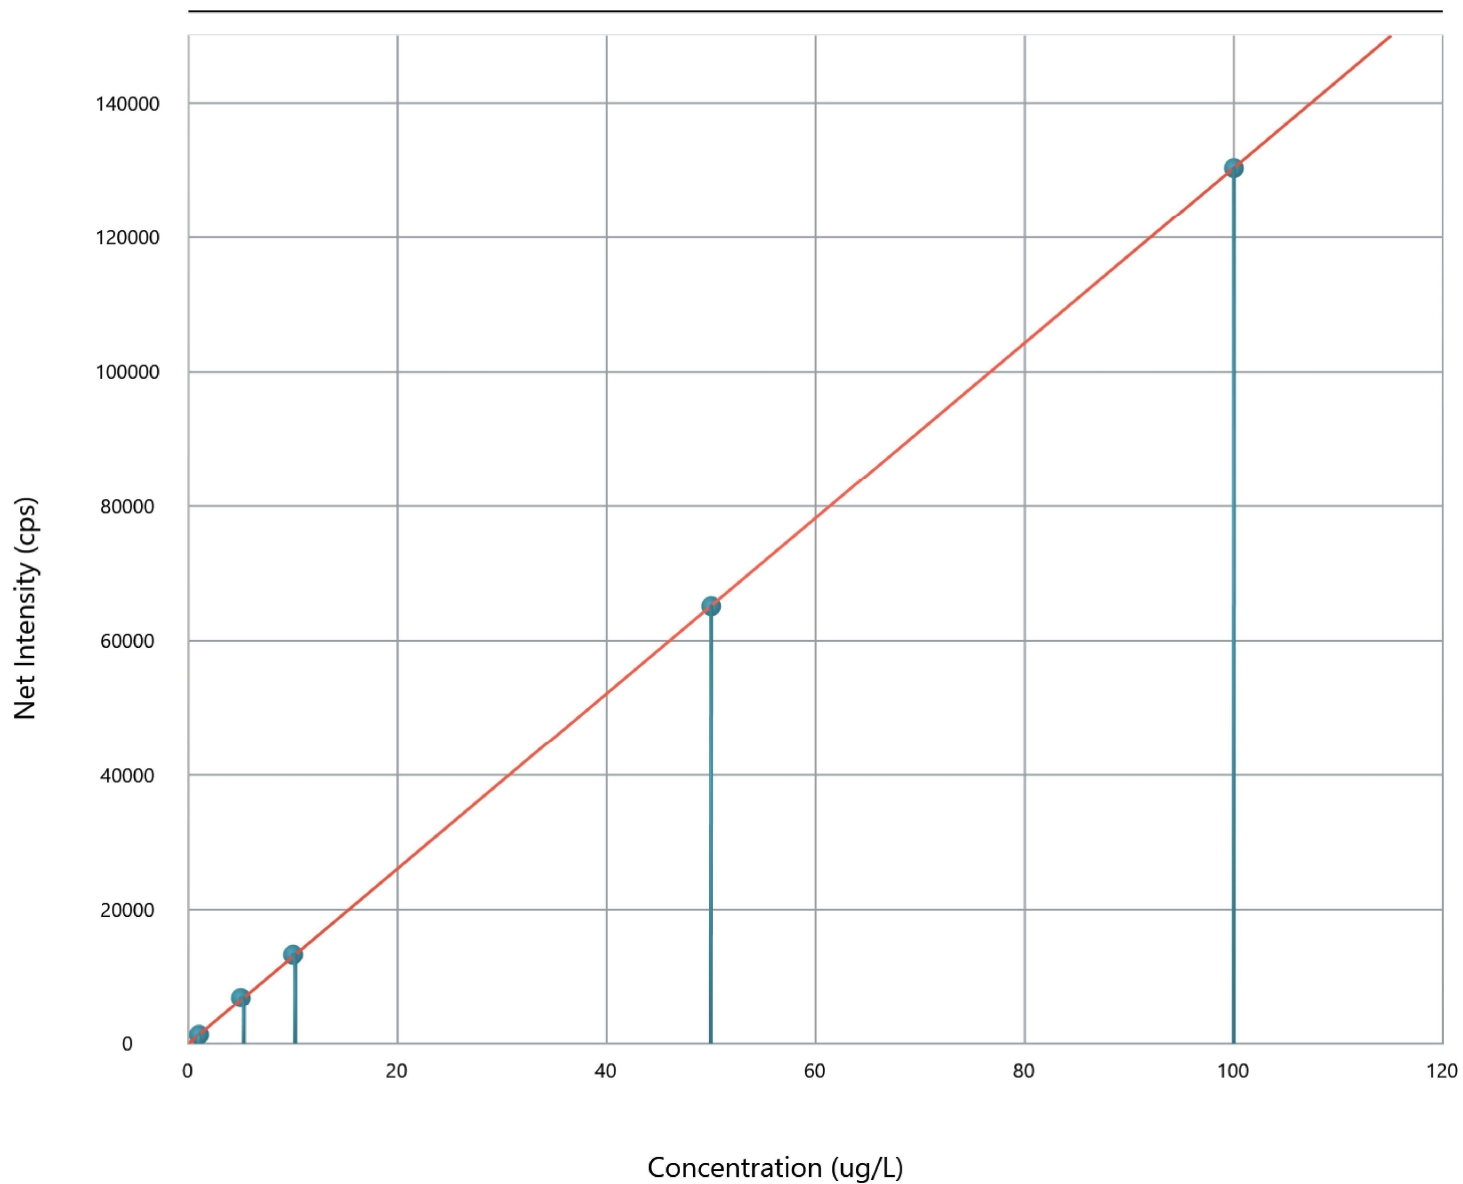

### Statistics

Eqn. :  $y = 1304x + 0$   
 Cor.Coeff. : 0.999995  
 BEC : 0.255660 ug/L  
 DL : 0.066144 ug/L

### Calibration Table

|            | Net Intensity<br>Cu 63 (cps) | Apparent Conc.<br>Cu 63 (ug/L) |
|------------|------------------------------|--------------------------------|
| Blank      | 333.3                        |                                |
| Cal. Std.1 | 1311.1                       | 1.006                          |
| Cal. Std.2 | 6902.8                       | 5.294                          |
| Cal. Std.3 | 13317.5                      | 10.214                         |
| Cal. Std.4 | 65133.3                      | 49.955                         |
| Cal. Std.5 | 130364.9                     | 99.986                         |

Fe 57 - Calibration

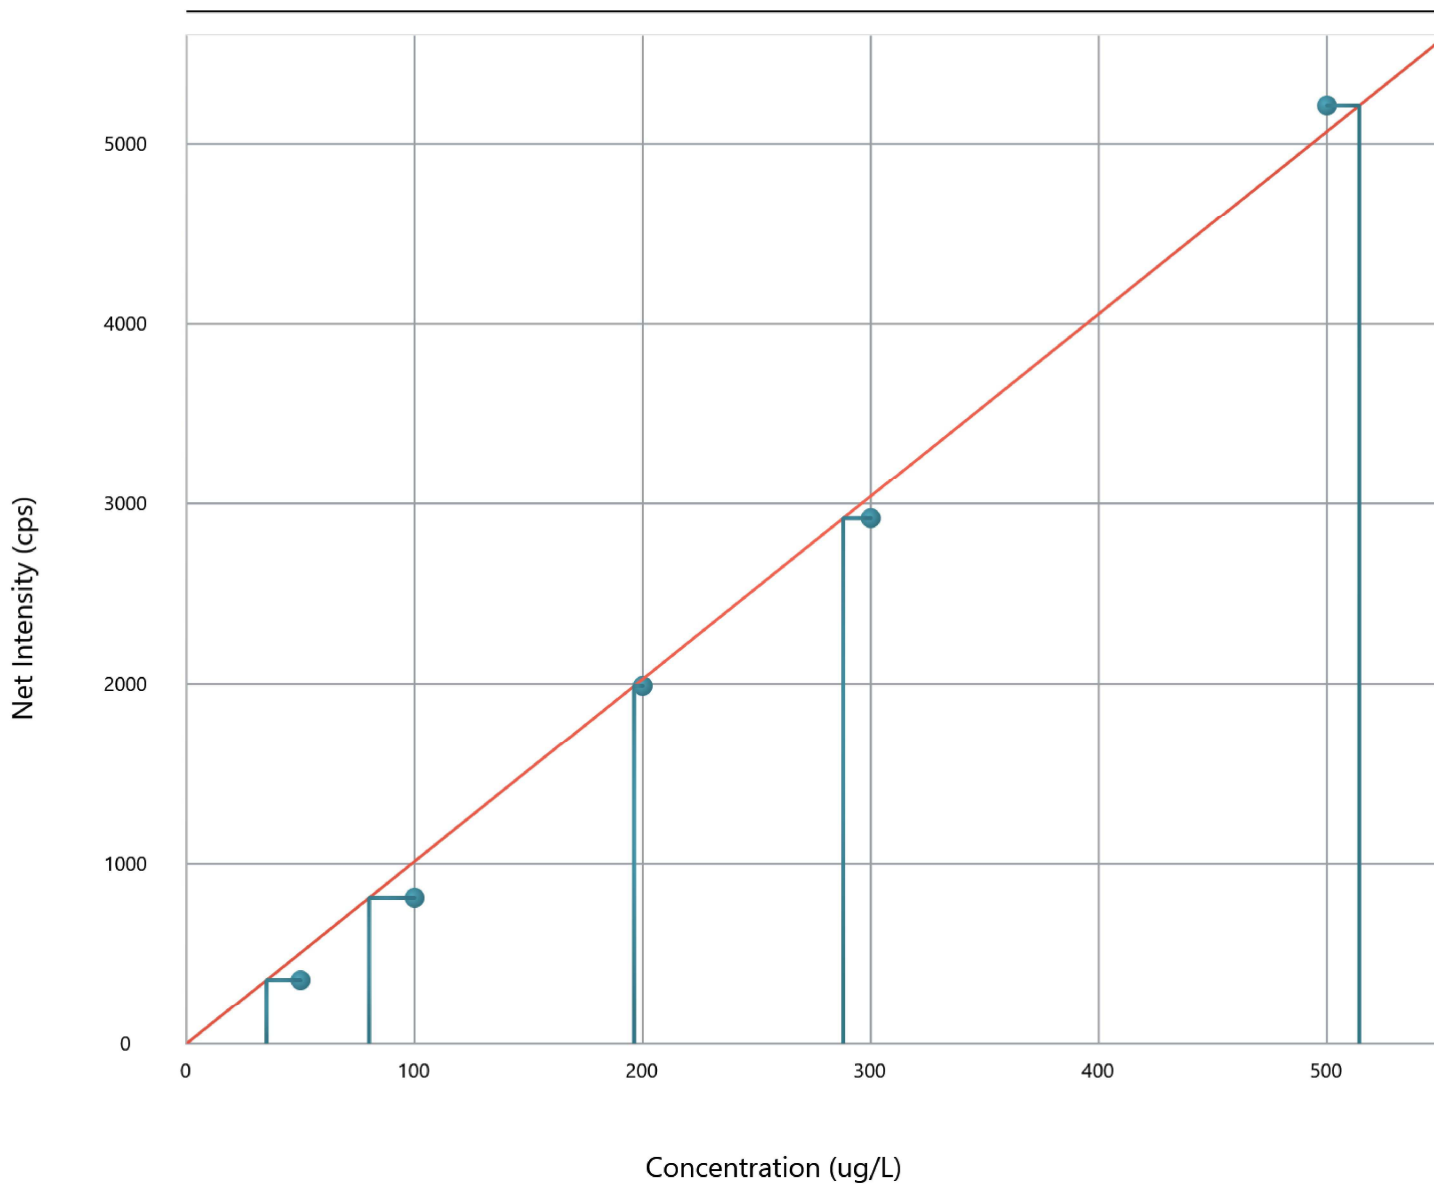

### Statistics

Eqn. :  $y = 10x + 0$   
 Cor.Coeff. : 0.998754  
 BEC : 21.208174 ug/L  
 DL : 5.622676 ug/L

### Calibration Table

|            | Net Intensity<br>Fe 57 (cps) | Apparent Conc.<br>Fe 57 (ug/L) |
|------------|------------------------------|--------------------------------|
| Blank      | 215.0                        |                                |
| Cal. Std.1 | 355.7                        | 35.085                         |
| Cal. Std.2 | 811.7                        | 80.068                         |
| Cal. Std.3 | 1990.2                       | 196.314                        |
| Cal. Std.4 | 2919.0                       | 287.937                        |
| Cal. Std.5 | 5212.7                       | 514.190                        |

Li 7 - Calibration

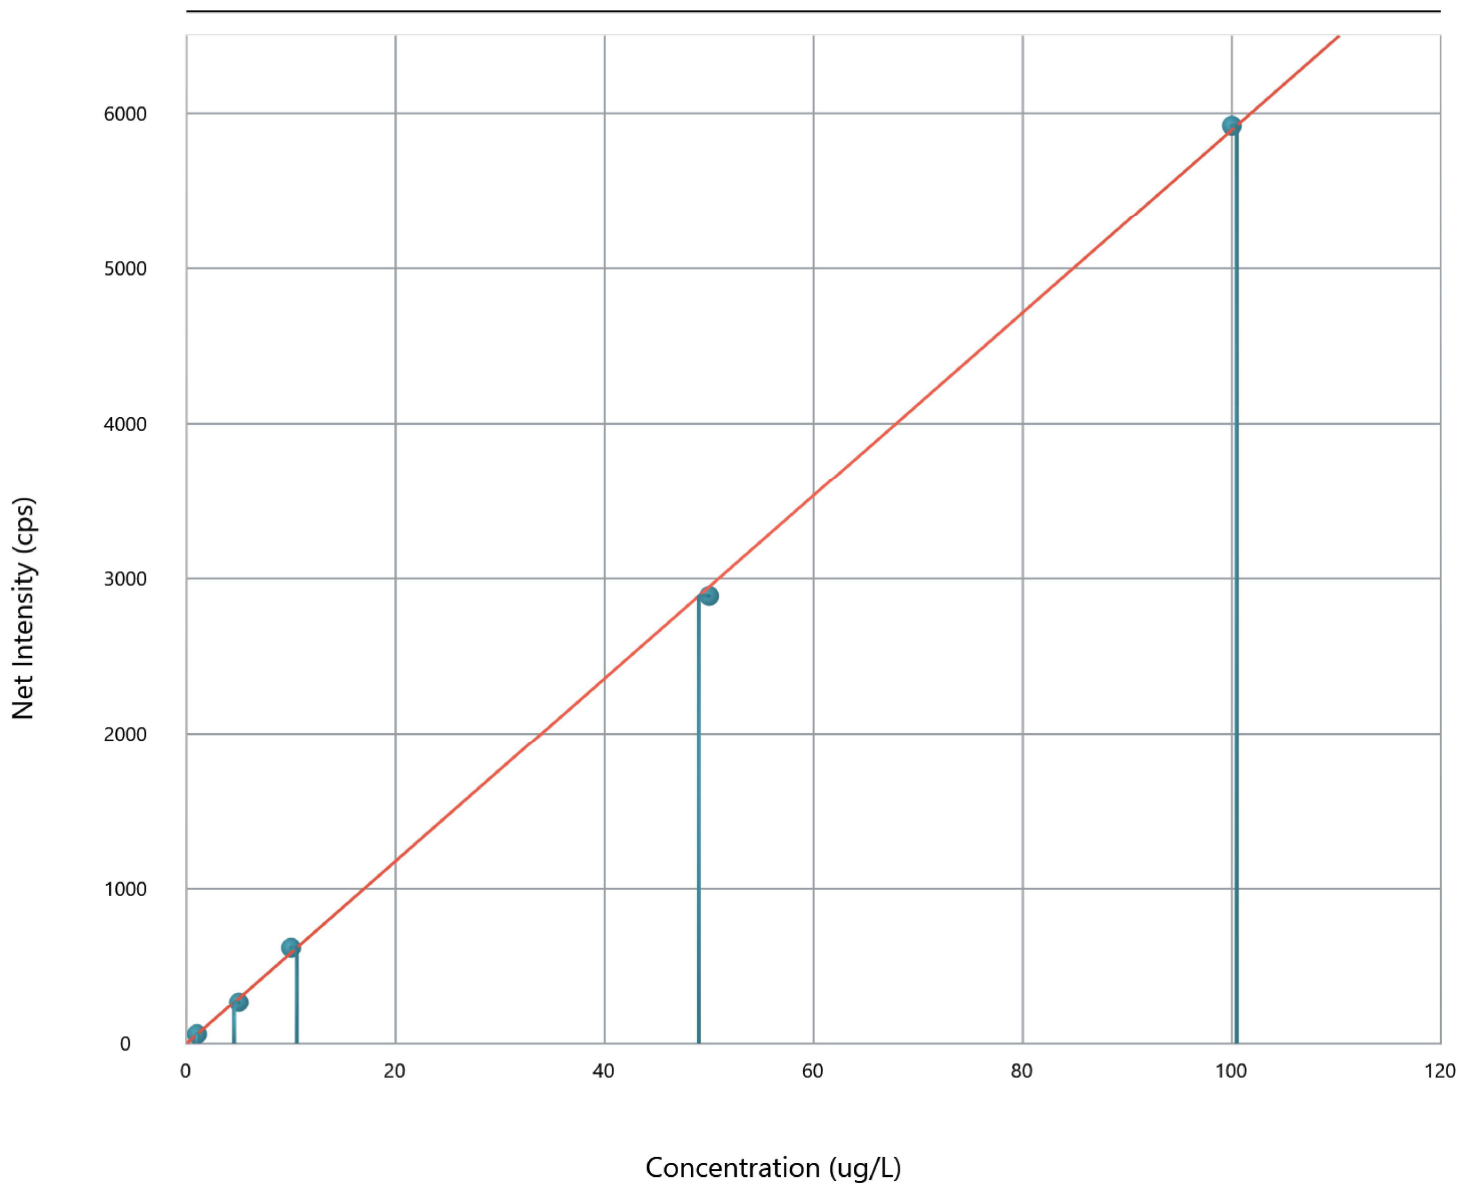

### Statistics

Eqn. :  $y = 59x + 0$   
 Cor.Coeff. : 0.999932  
 BEC : 0.016967 ug/L  
 DL : 0.000000 ug/L

### Calibration Table

|            | Net Intensity<br>Li 7 (cps) | Apparent Conc.<br>Li 7 (ug/L) |
|------------|-----------------------------|-------------------------------|
| Blank      | 1.0                         |                               |
| Cal. Std.1 | 60.7                        | 1.029                         |
| Cal. Std.2 | 268.3                       | 4.553                         |
| Cal. Std.3 | 622.0                       | 10.554                        |
| Cal. Std.4 | 2888.0                      | 49.000                        |
| Cal. Std.5 | 5921.2                      | 100.466                       |

Mg 24 - Calibration

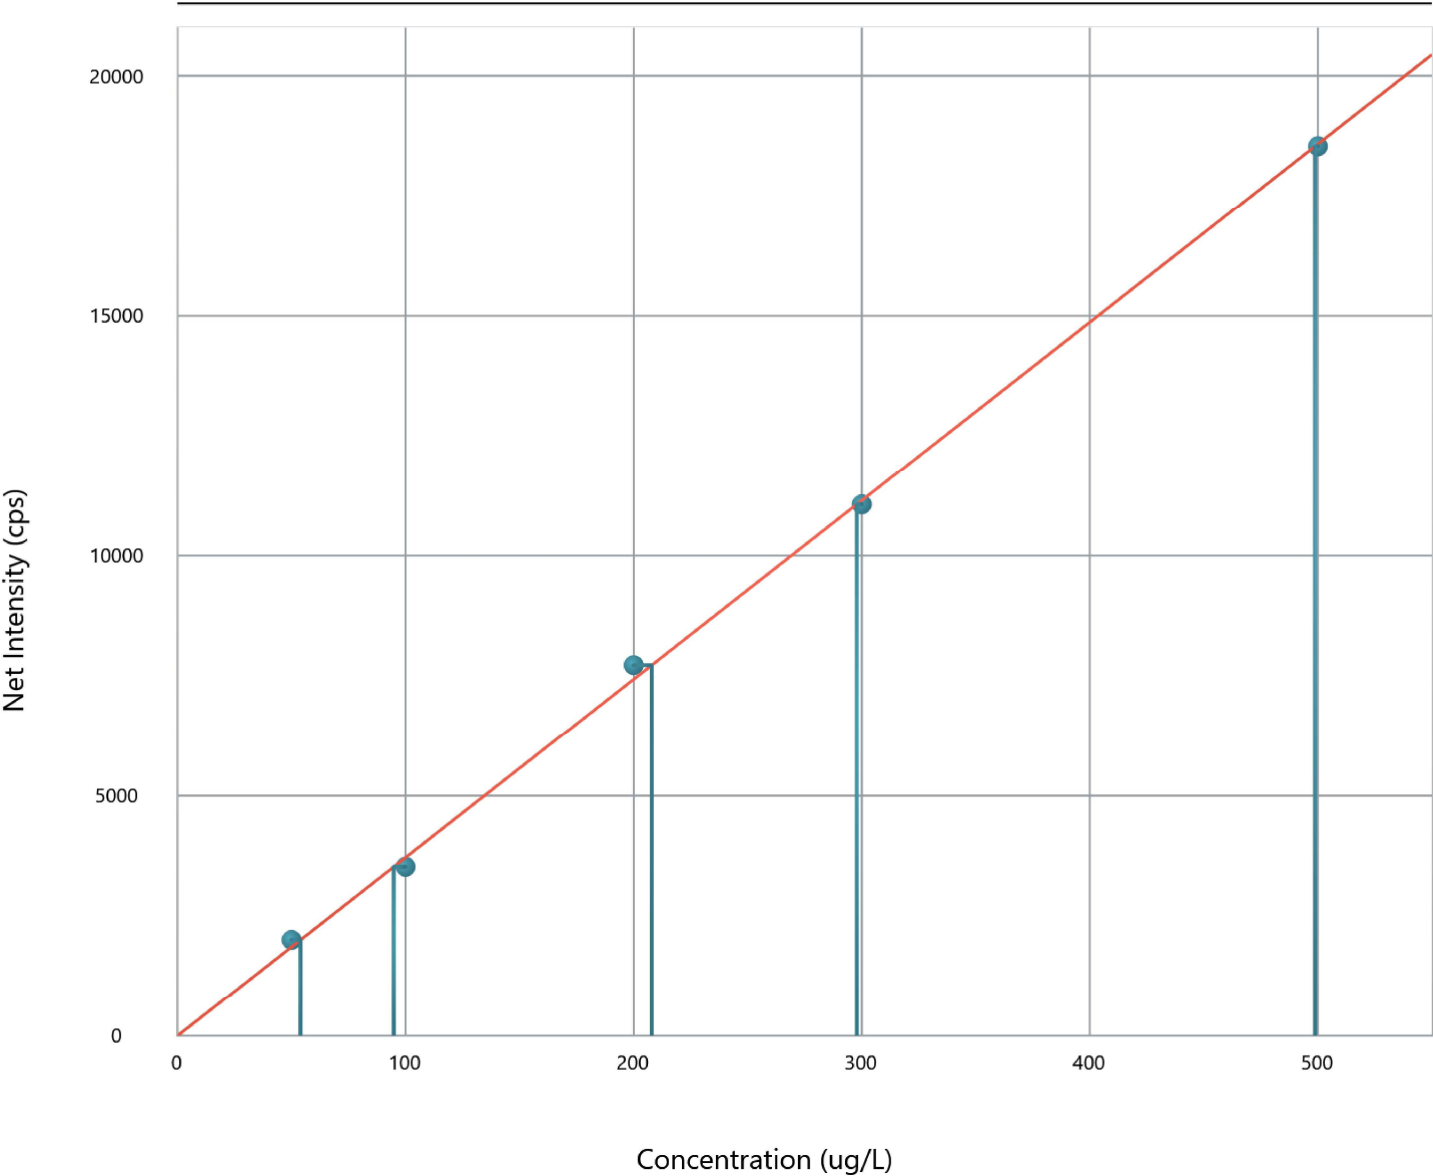

Statistics

Eqn. :  $y = 37x + 0$   
Cor.Coeff. : 0.999858  
BEC : 3.031434 ug/L  
DL : 0.889131 ug/L

Calibration Table

|            | Net Intensity<br>Mg 24 (cps) | Apparent Conc.<br>Mg 24 (ug/L) |
|------------|------------------------------|--------------------------------|
| Blank      | 112.7                        |                                |
| Cal. Std.1 | 2005.2                       | 53.951                         |
| Cal. Std.2 | 3524.1                       | 94.821                         |
| Cal. Std.3 | 7728.2                       | 207.934                        |
| Cal. Std.4 | 11069.0                      | 297.825                        |
| Cal. Std.5 | 18537.5                      | 498.772                        |



Mn 55 - Calibration

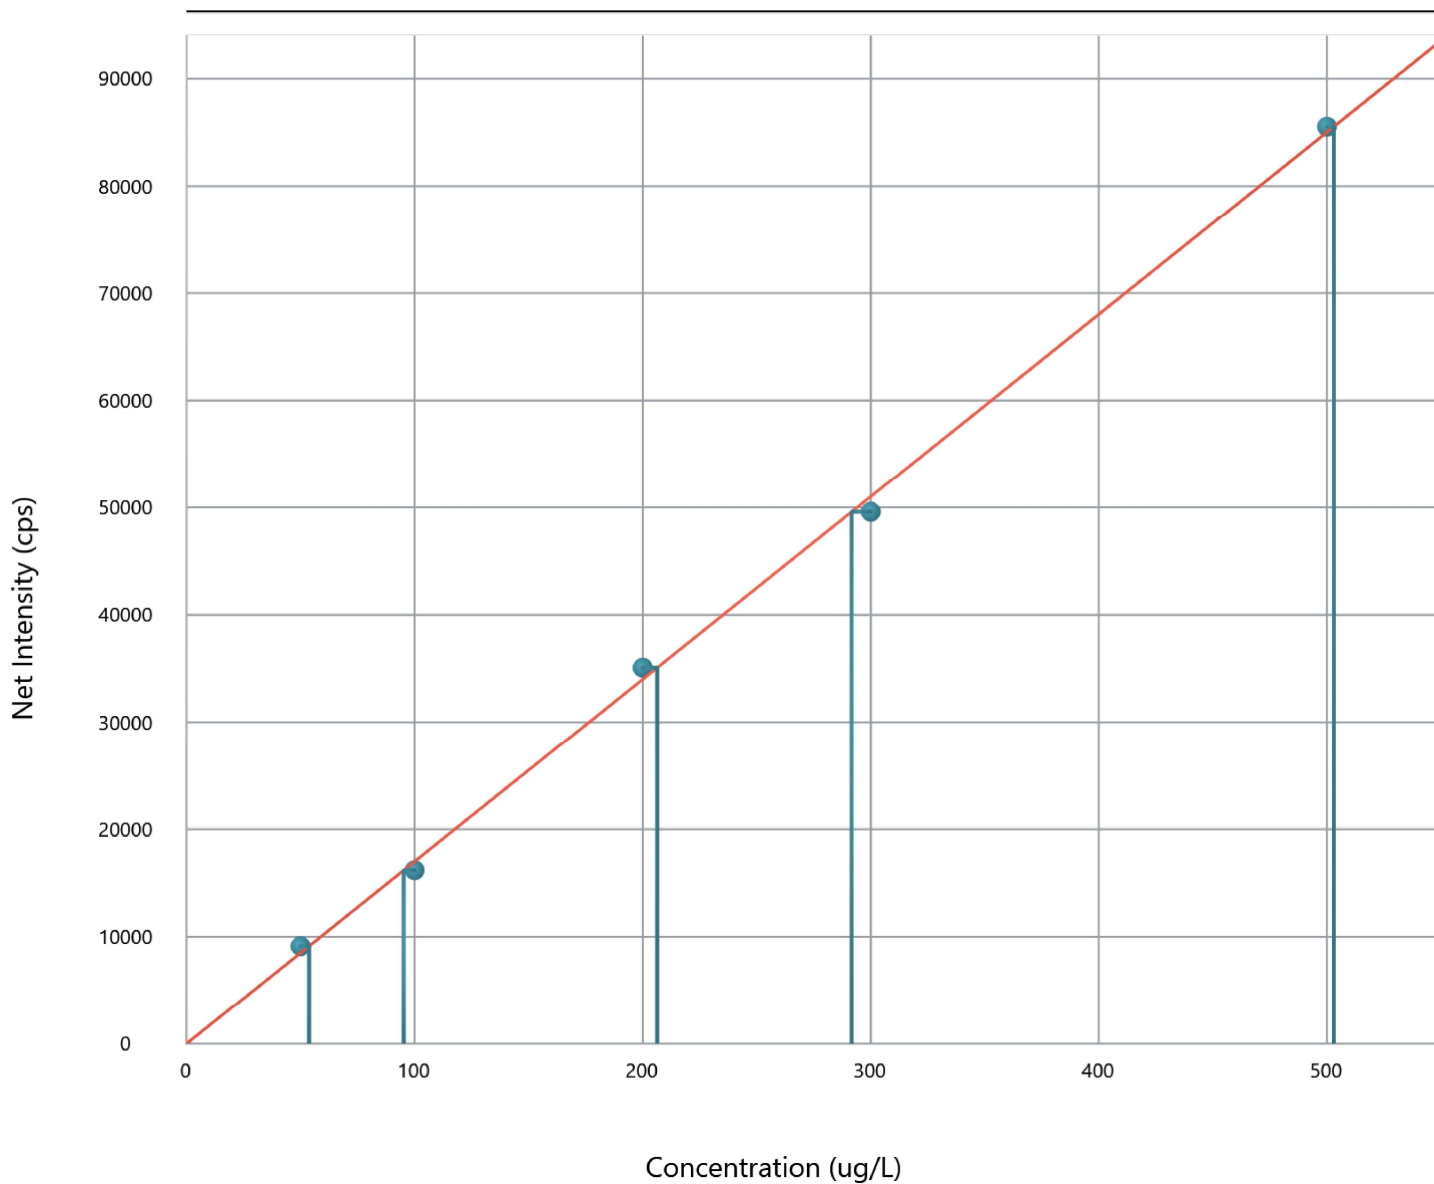

### Statistics

Eqn. :  $y = 170x + 0$   
 Cor.Coeff. : 0.999801  
 BEC : 0.235213 ug/L  
 DL : 0.110168 ug/L

### Calibration Table

|            | Net Intensity<br>Mn 55 (cps) | Apparent Conc.<br>Mn 55 (ug/L) |
|------------|------------------------------|--------------------------------|
| Blank      | 40.0                         |                                |
| Cal. Std.1 | 9141.3                       | 53.754                         |
| Cal. Std.2 | 16199.9                      | 95.260                         |
| Cal. Std.3 | 35098.8                      | 206.392                        |
| Cal. Std.4 | 49596.1                      | 291.641                        |
| Cal. Std.5 | 85545.0                      | 503.031                        |

Ni 60 - Calibration

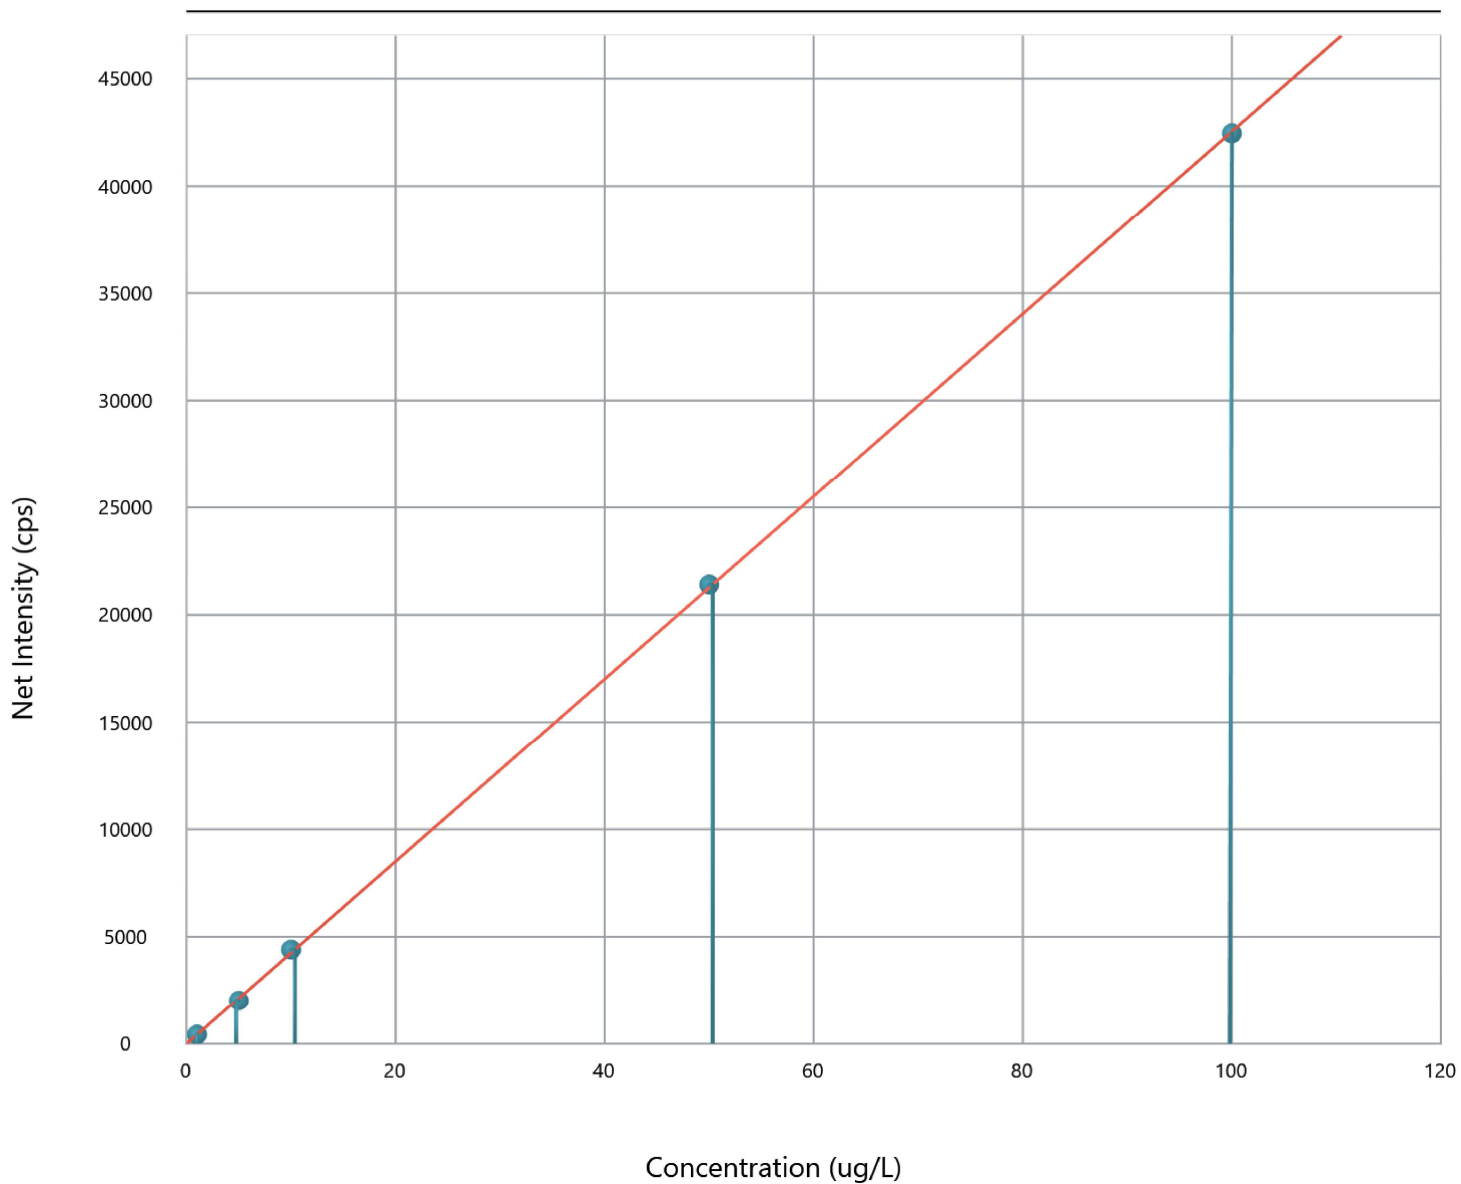

### Statistics

Eqn. :  $y = 425x + 0$   
 Cor.Coeff. : 0.999986  
 BEC : 0.416049 ug/L  
 DL : 0.014103 ug/L

### Calibration Table

|            | Net Intensity<br>Ni 60 (cps) | Apparent Conc.<br>Ni 60 (ug/L) |
|------------|------------------------------|--------------------------------|
| Blank      | 177.0                        |                                |
| Cal. Std.1 | 425.3                        | 1.000                          |
| Cal. Std.2 | 2023.2                       | 4.756                          |
| Cal. Std.3 | 4411.4                       | 10.369                         |
| Cal. Std.4 | 21413.0                      | 50.332                         |
| Cal. Std.5 | 42462.2                      | 99.809                         |

Pb 208 - Calibration

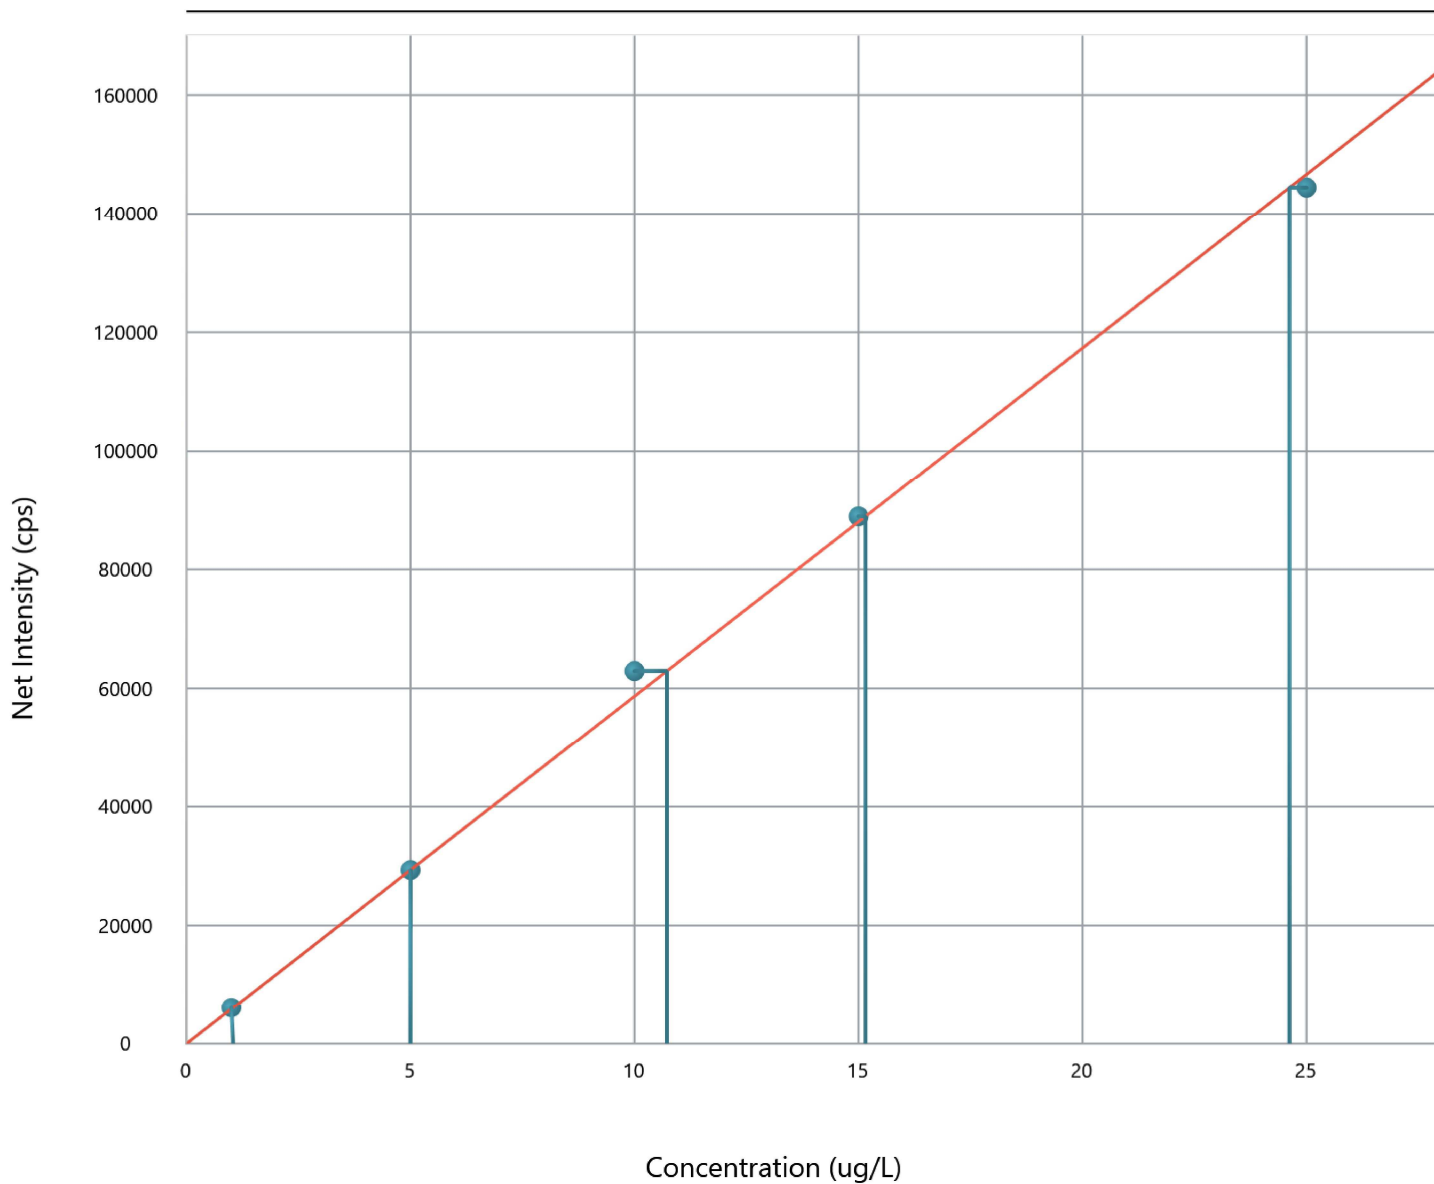

### Statistics

Eqn. :  $y = 5867x + 0$   
 Cor.Coeff. : 0.999646  
 BEC : 0.228505 ug/L  
 DL : 0.025126 ug/L

### Calibration Table

|            | Net Intensity<br>Pb 208 (cps) | Apparent Conc.<br>Pb 208 (ug/L) |
|------------|-------------------------------|---------------------------------|
| Blank      | 1340.7                        |                                 |
| Cal. Std.1 | 6110.5                        | 1.041                           |
| Cal. Std.2 | 29311.1                       | 4.996                           |
| Cal. Std.3 | 62907.8                       | 10.722                          |
| Cal. Std.4 | 88913.2                       | 15.154                          |
| Cal. Std.5 | 144445.2                      | 24.618                          |

TI 205 - Calibration

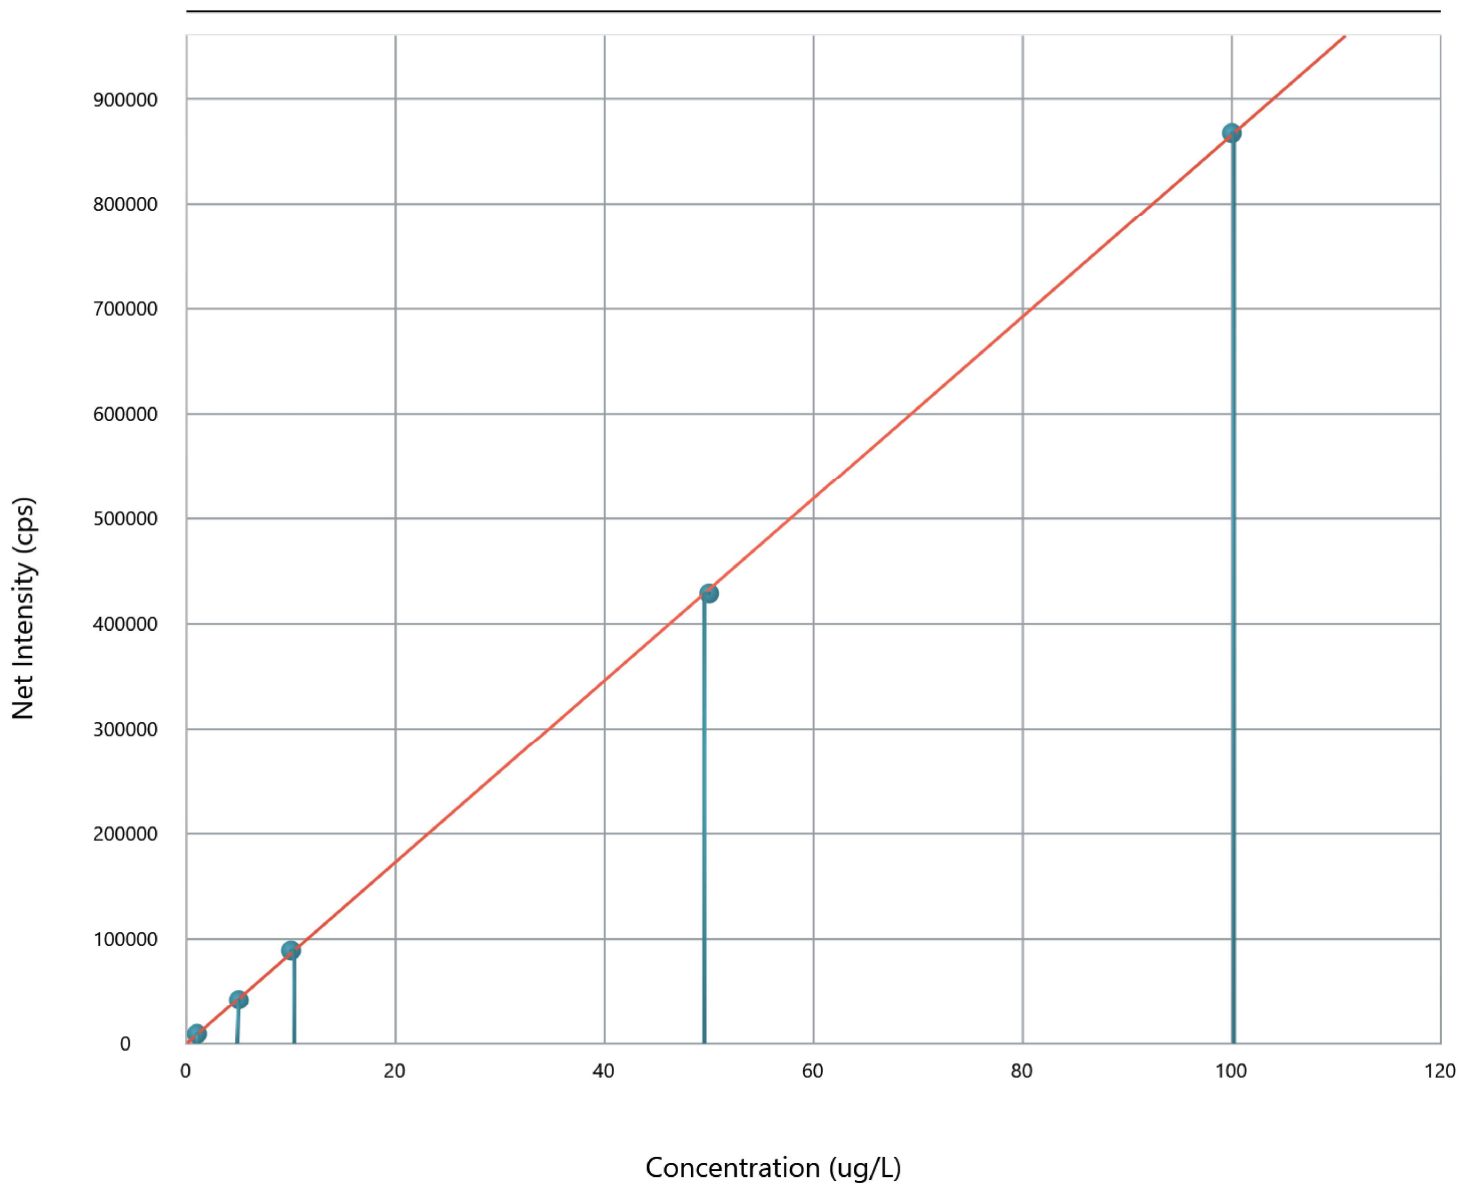

### Statistics

Eqn. :  $y = 8658x + 0$   
 Cor.Coeff. : 0.999985  
 BEC : 0.009972 ug/L  
 DL : 0.004061 ug/L

### Calibration Table

|            | Net Intensity<br>TI 205 (cps) | Apparent Conc.<br>TI 205 (ug/L) |
|------------|-------------------------------|---------------------------------|
| Blank      | 86.3                          |                                 |
| Cal. Std.1 | 9201.7                        | 1.063                           |
| Cal. Std.2 | 42056.1                       | 4.858                           |
| Cal. Std.3 | 89242.8                       | 10.308                          |
| Cal. Std.4 | 428953.4                      | 49.546                          |
| Cal. Std.5 | 867533.3                      | 100.203                         |

### V 51 - Calibration

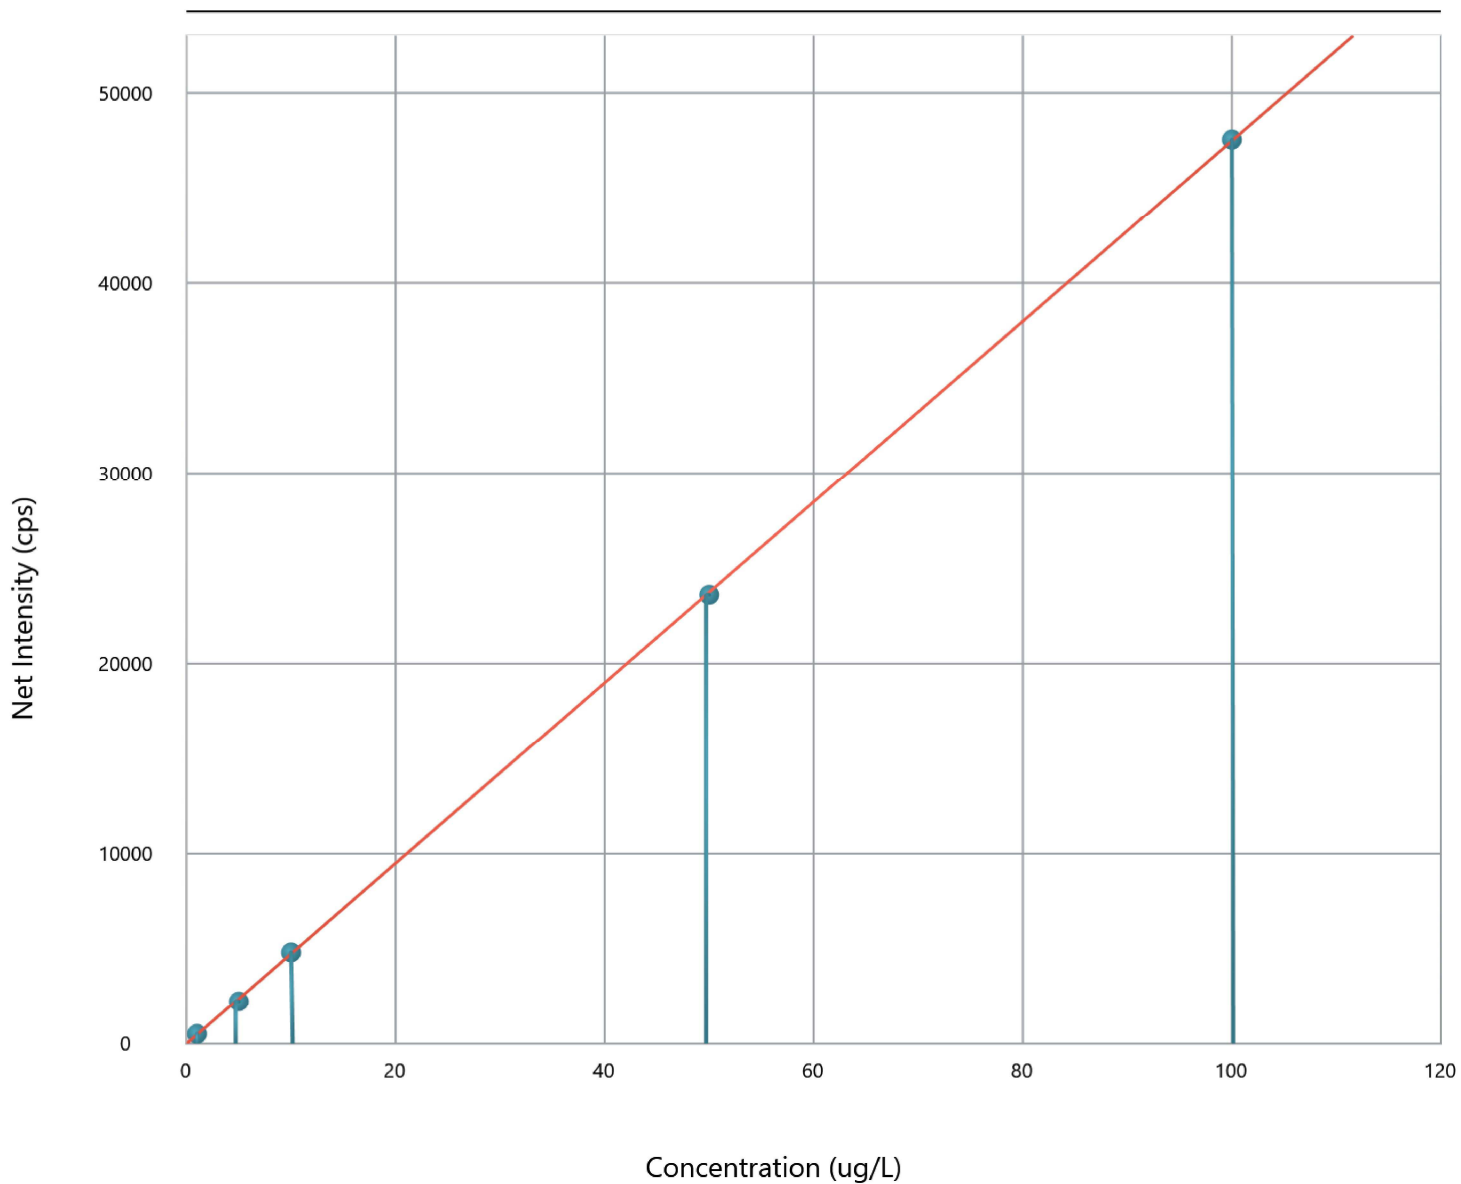

### Statistics

Eqn. :  $y = 475x + 0$   
 Cor.Coeff. : 0.999991  
 BEC : 0.019654 ug/L  
 DL : 0.028487 ug/L

### Calibration Table

|            | Net Intensity<br>V 51 (cps) | Apparent Conc.<br>V 51 (ug/L) |
|------------|-----------------------------|-------------------------------|
| Blank      | 9.3                         |                               |
| Cal. Std.1 | 511.7                       | 1.078                         |
| Cal. Std.2 | 2235.8                      | 4.708                         |
| Cal. Std.3 | 4823.5                      | 10.157                        |
| Cal. Std.4 | 23607.2                     | 49.713                        |
| Cal. Std.5 | 47554.4                     | 100.142                       |

Zn 66 - Calibration

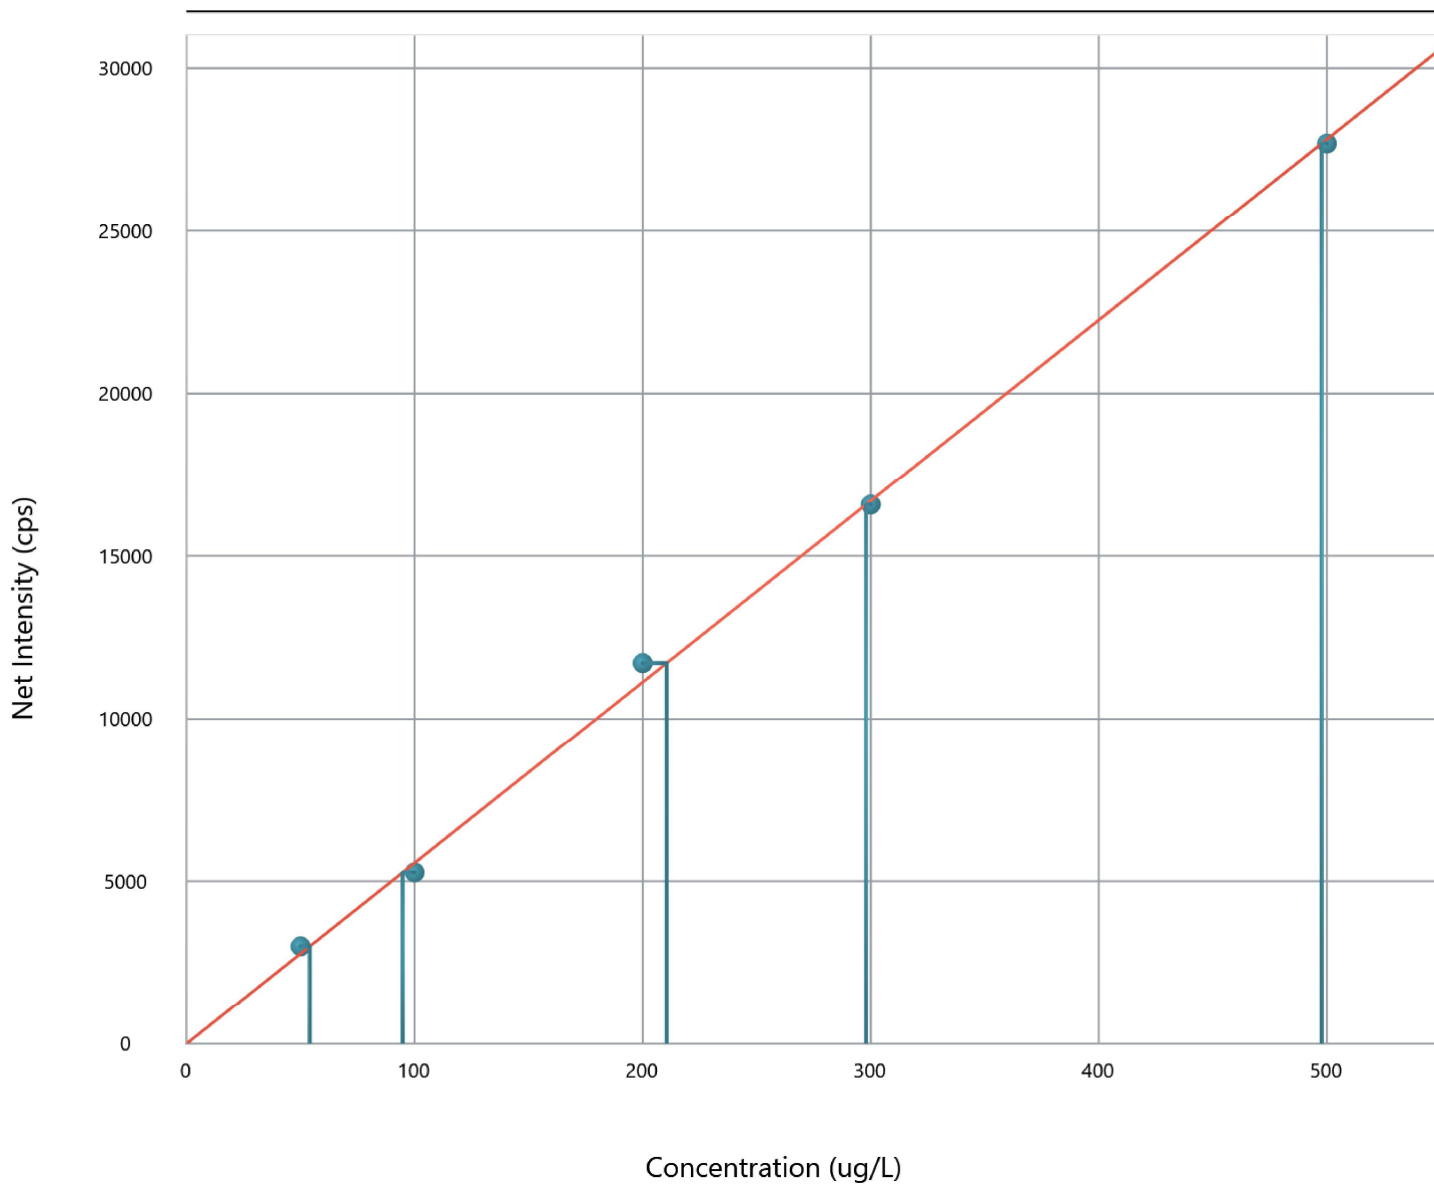

### Statistics

Eqn. :  $y = 56x + 0$   
 Cor.Coeff. : 0.999791  
 BEC : 3.468381 ug/L  
 DL : 0.777545 ug/L

### Calibration Table

|            | Net Intensity<br>Zn 66 (cps) | Apparent Conc.<br>Zn 66 (ug/L) |
|------------|------------------------------|--------------------------------|
| Blank      | 193.0                        |                                |
| Cal. Std.1 | 3008.4                       | 54.062                         |
| Cal. Std.2 | 5274.0                       | 94.779                         |
| Cal. Std.3 | 11714.6                      | 210.521                        |
| Cal. Std.4 | 16579.5                      | 297.946                        |
| Cal. Std.5 | 27692.9                      | 497.662                        |

Hg 202 - Calibration

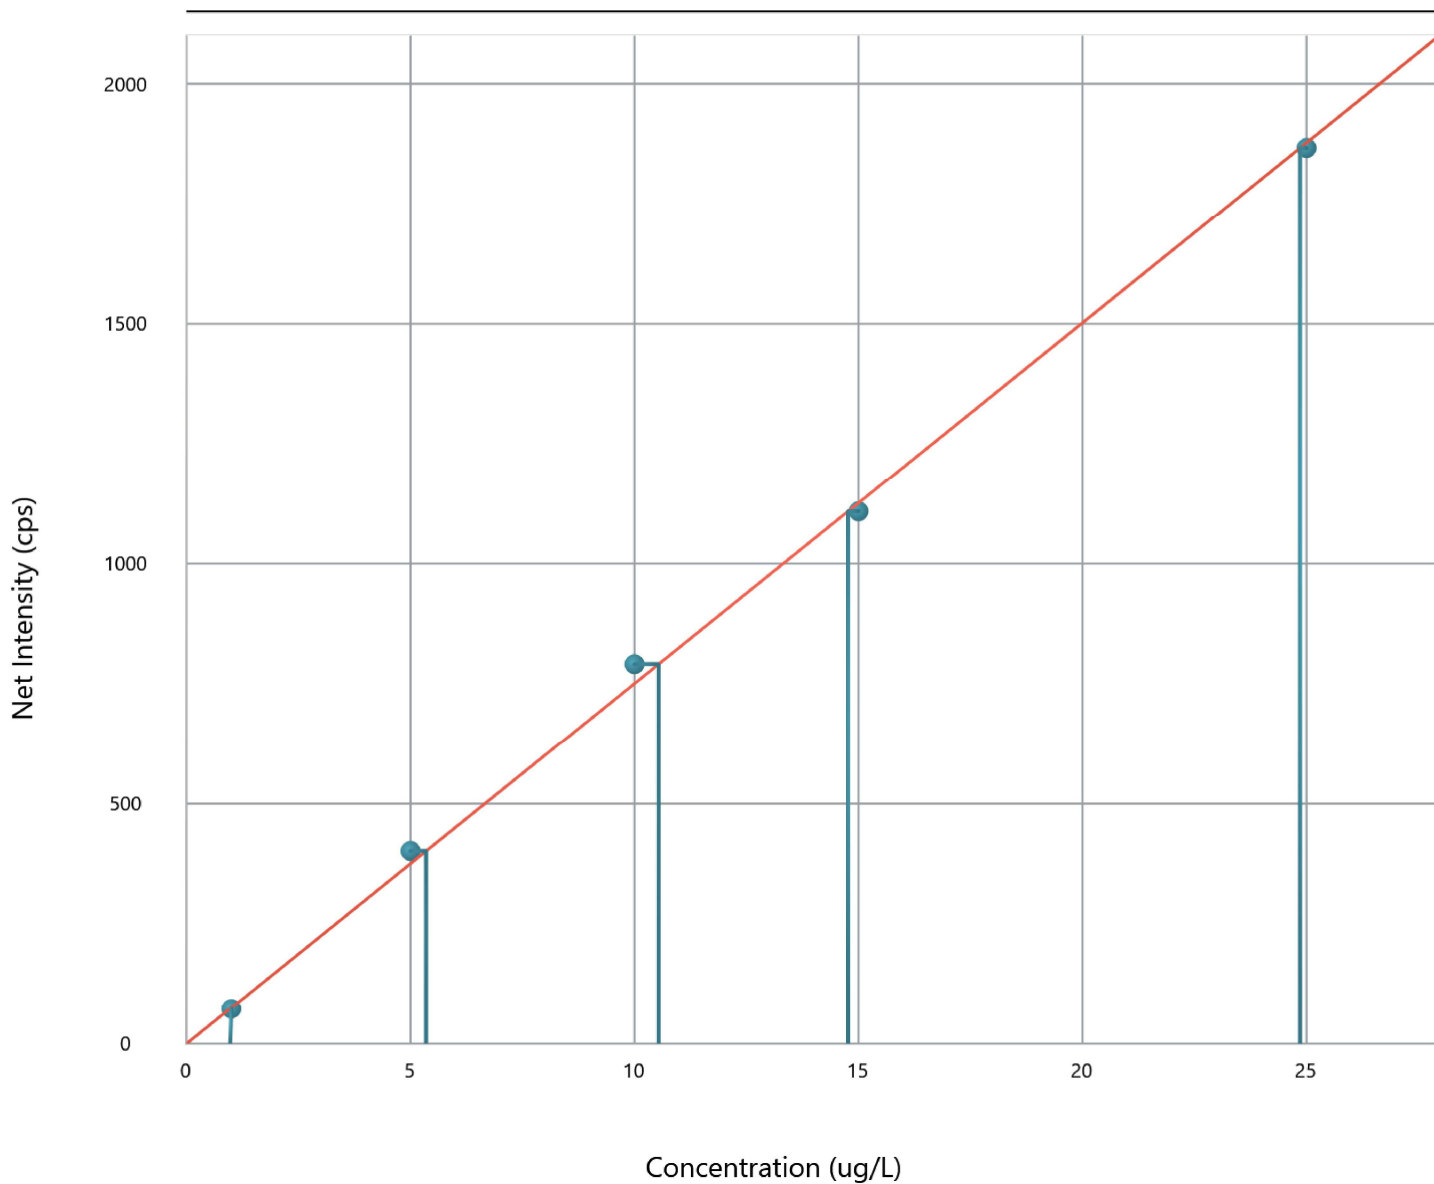

### Statistics

Eqn. :  $y = 75x + 0$   
 Cor.Coeff. : 0.999751  
 BEC : 0.310685 ug/L  
 DL : 0.100527 ug/L

### Calibration Table

|            | Net Intensity<br>Hg 202 (cps) | Apparent Conc.<br>Hg 202 (ug/L) |
|------------|-------------------------------|---------------------------------|
| Blank      | 23.3                          |                                 |
| Cal. Std.1 | 73.0                          | 0.972                           |
| Cal. Std.2 | 401.7                         | 5.348                           |
| Cal. Std.3 | 791.4                         | 10.537                          |
| Cal. Std.4 | 1109.0                        | 14.767                          |
| Cal. Std.5 | 1866.8                        | 24.856                          |

### Mo 98 - Calibration

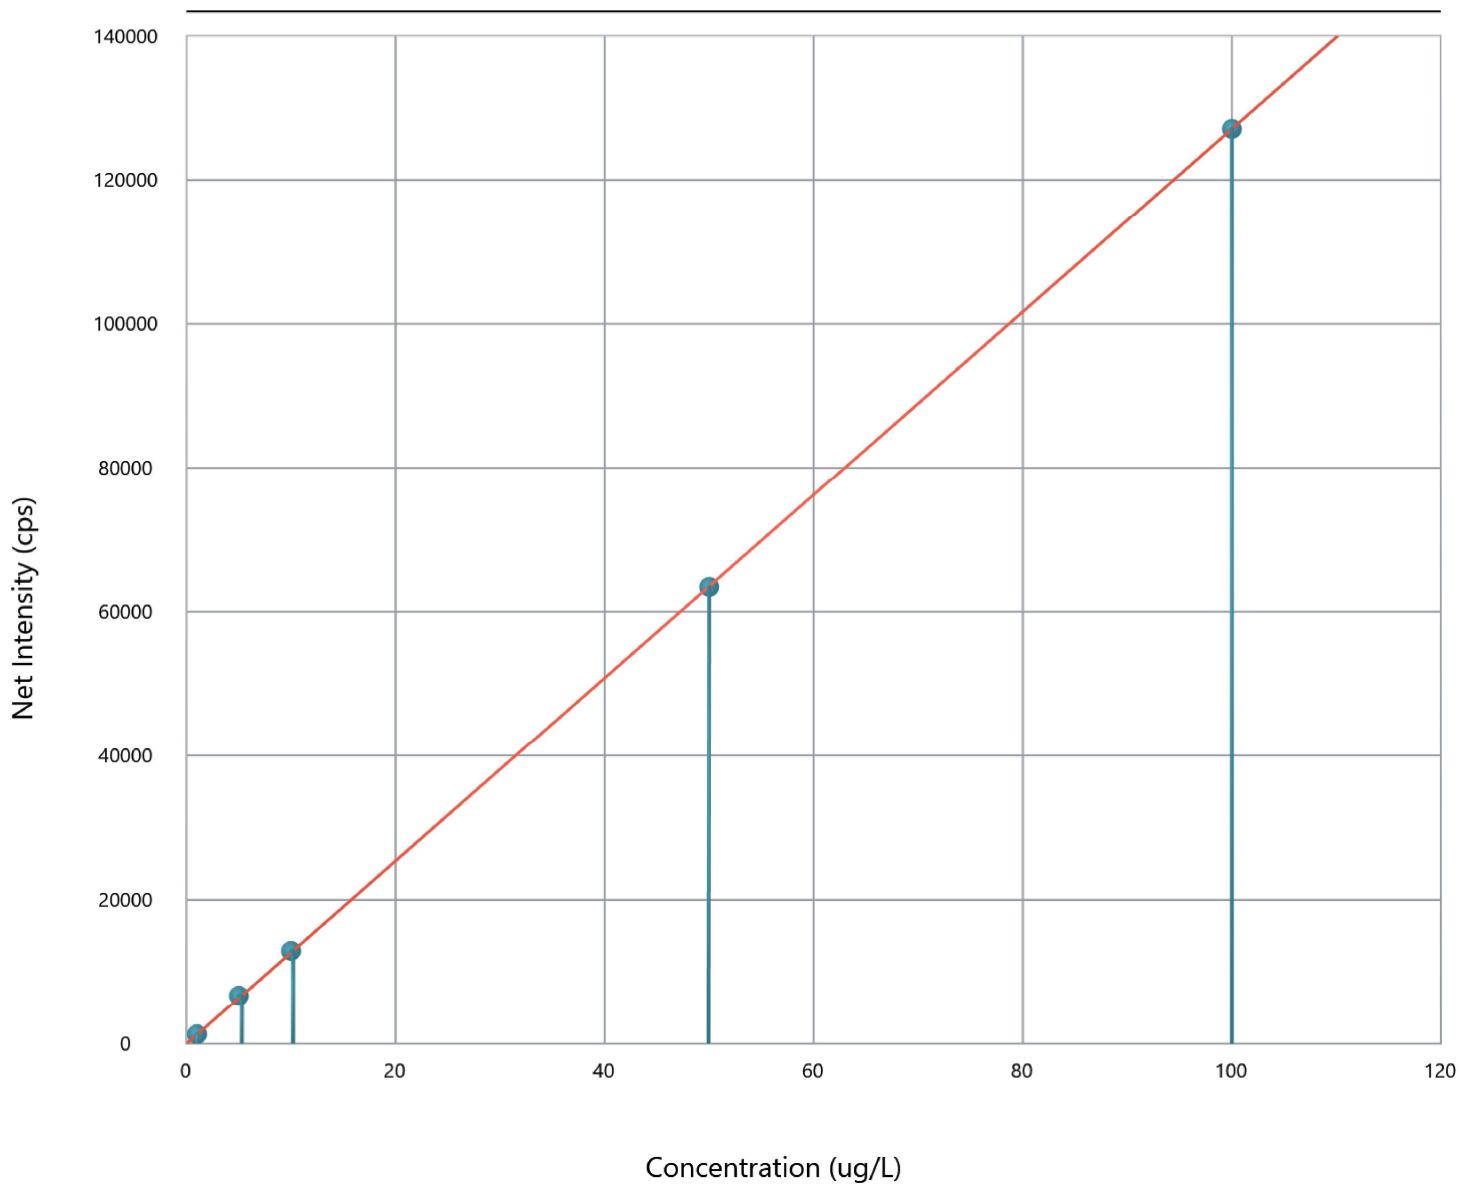

### Statistics

Eqn. :  $y = 1271x + 0$   
 Cor.Coeff. : 0.999995  
 BEC : 0.132808 ug/L  
 DL : 0.059780 ug/L

### Calibration Table

|            | Net Intensity<br>Mo 98 (cps) | Apparent Conc.<br>Mo 98 (ug/L) |
|------------|------------------------------|--------------------------------|
| Blank      | 168.8                        |                                |
| Cal. Std.1 | 1312.2                       | 1.032                          |
| Cal. Std.2 | 6717.2                       | 5.285                          |
| Cal. Std.3 | 12955.1                      | 10.194                         |
| Cal. Std.4 | 63458.4                      | 49.932                         |
| Cal. Std.5 | 127090.8                     | 100.000                        |



# Pd 106 - Calibration

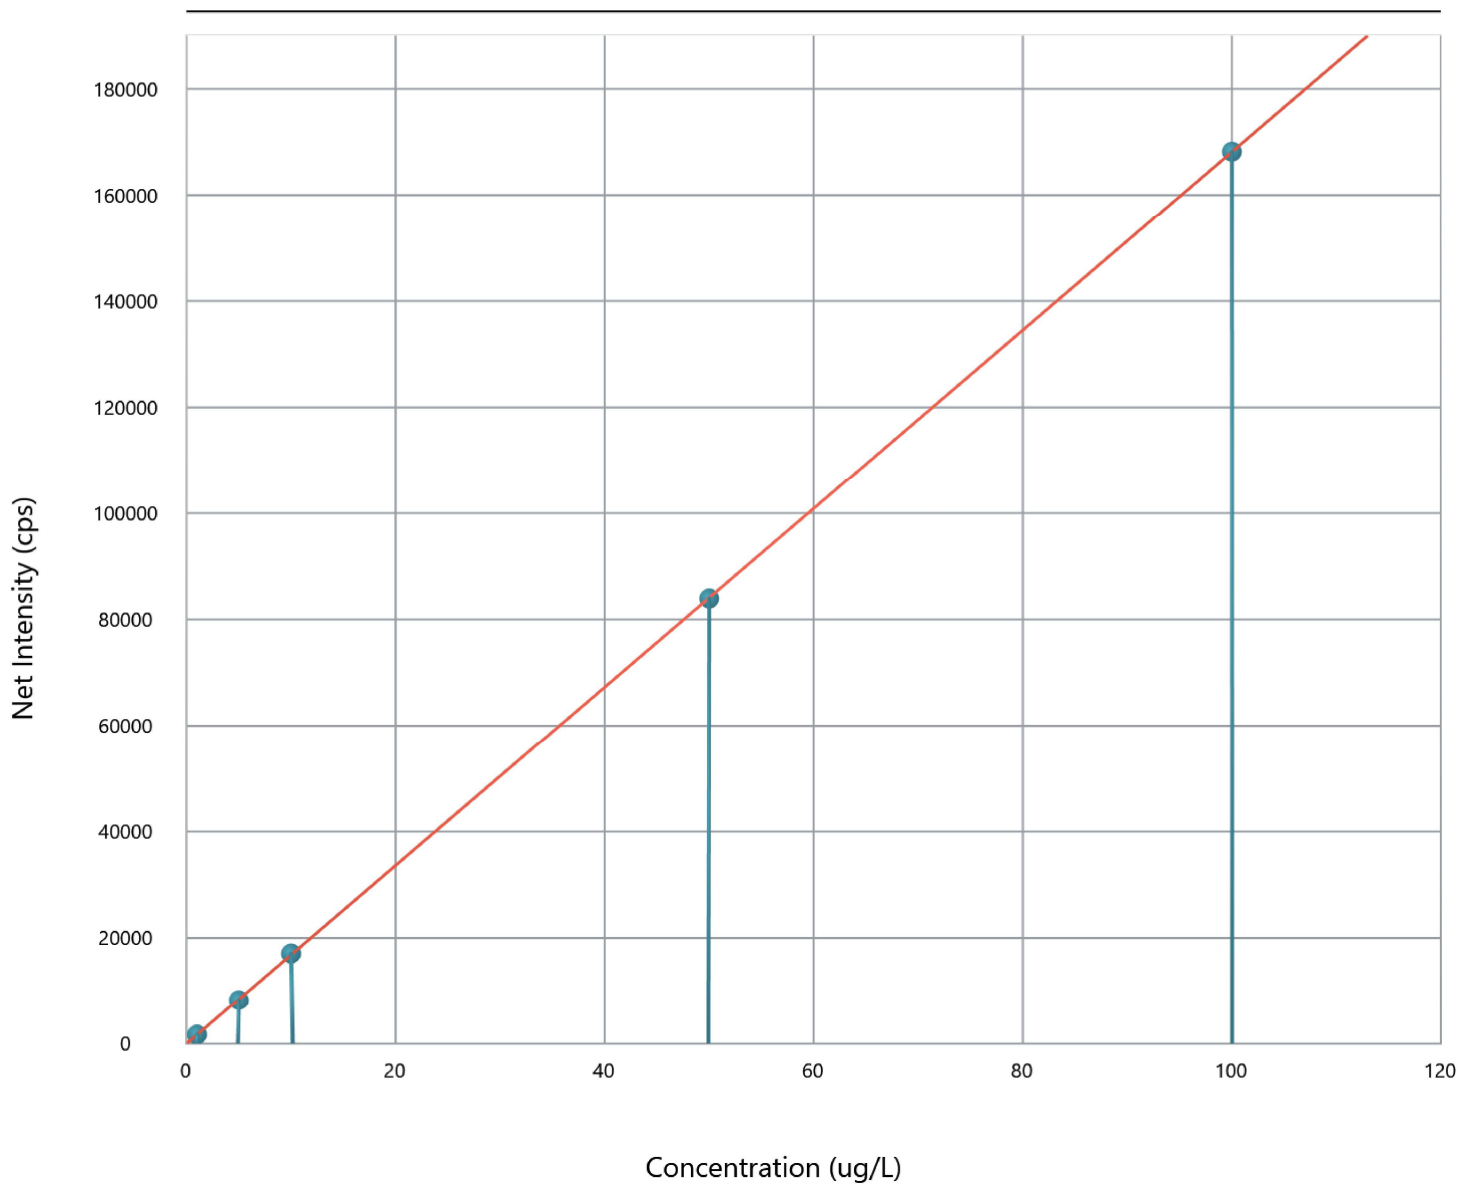

## Statistics

Eqn. :  $y = 1682x + 0$   
 Cor.Coeff. : 0.999998  
 BEC : 0.071536 ug/L  
 DL : 0.036199 ug/L

## Calibration Table

|            | Net Intensity<br>Pd 106 (cps) | Apparent Conc.<br>Pd 106 (ug/L) |
|------------|-------------------------------|---------------------------------|
| Blank      | 120.3                         |                                 |
| Cal. Std.1 | 1719.8                        | 1.023                           |
| Cal. Std.2 | 8262.8                        | 4.914                           |
| Cal. Std.3 | 17083.1                       | 10.159                          |
| Cal. Std.4 | 83939.7                       | 49.918                          |
| Cal. Std.5 | 168204.2                      | 100.029                         |

Pt 195 - Calibration

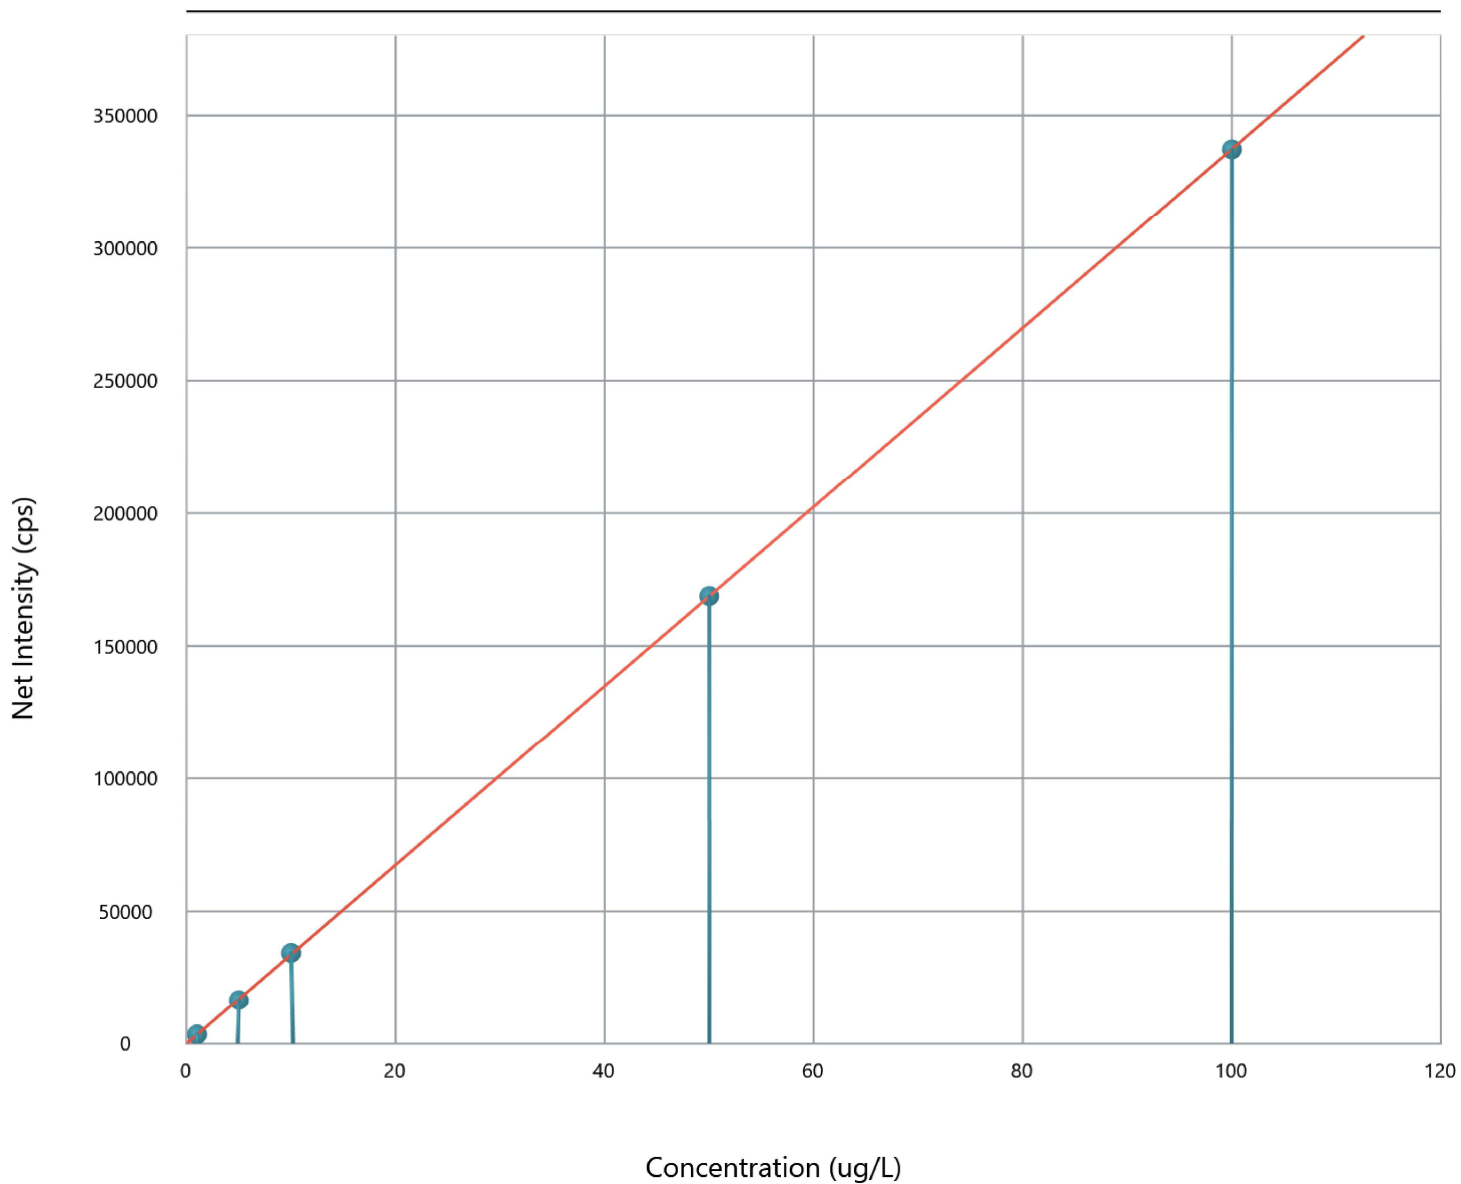

### Statistics

Eqn. :  $y = 3374x + 0$   
 Cor.Coeff. : 0.999998  
 BEC : 0.002766 ug/L  
 DL : 0.001358 ug/L

### Calibration Table

|            | Net Intensity<br>Pt 195 (cps) | Apparent Conc.<br>Pt 195 (ug/L) |
|------------|-------------------------------|---------------------------------|
| Blank      | 9.3                           |                                 |
| Cal. Std.1 | 3489.4                        | 1.034                           |
| Cal. Std.2 | 16528.6                       | 4.899                           |
| Cal. Std.3 | 34377.3                       | 10.190                          |
| Cal. Std.4 | 168784.0                      | 50.028                          |
| Cal. Std.5 | 337281.0                      | 99.972                          |

Sb 121 - Calibration

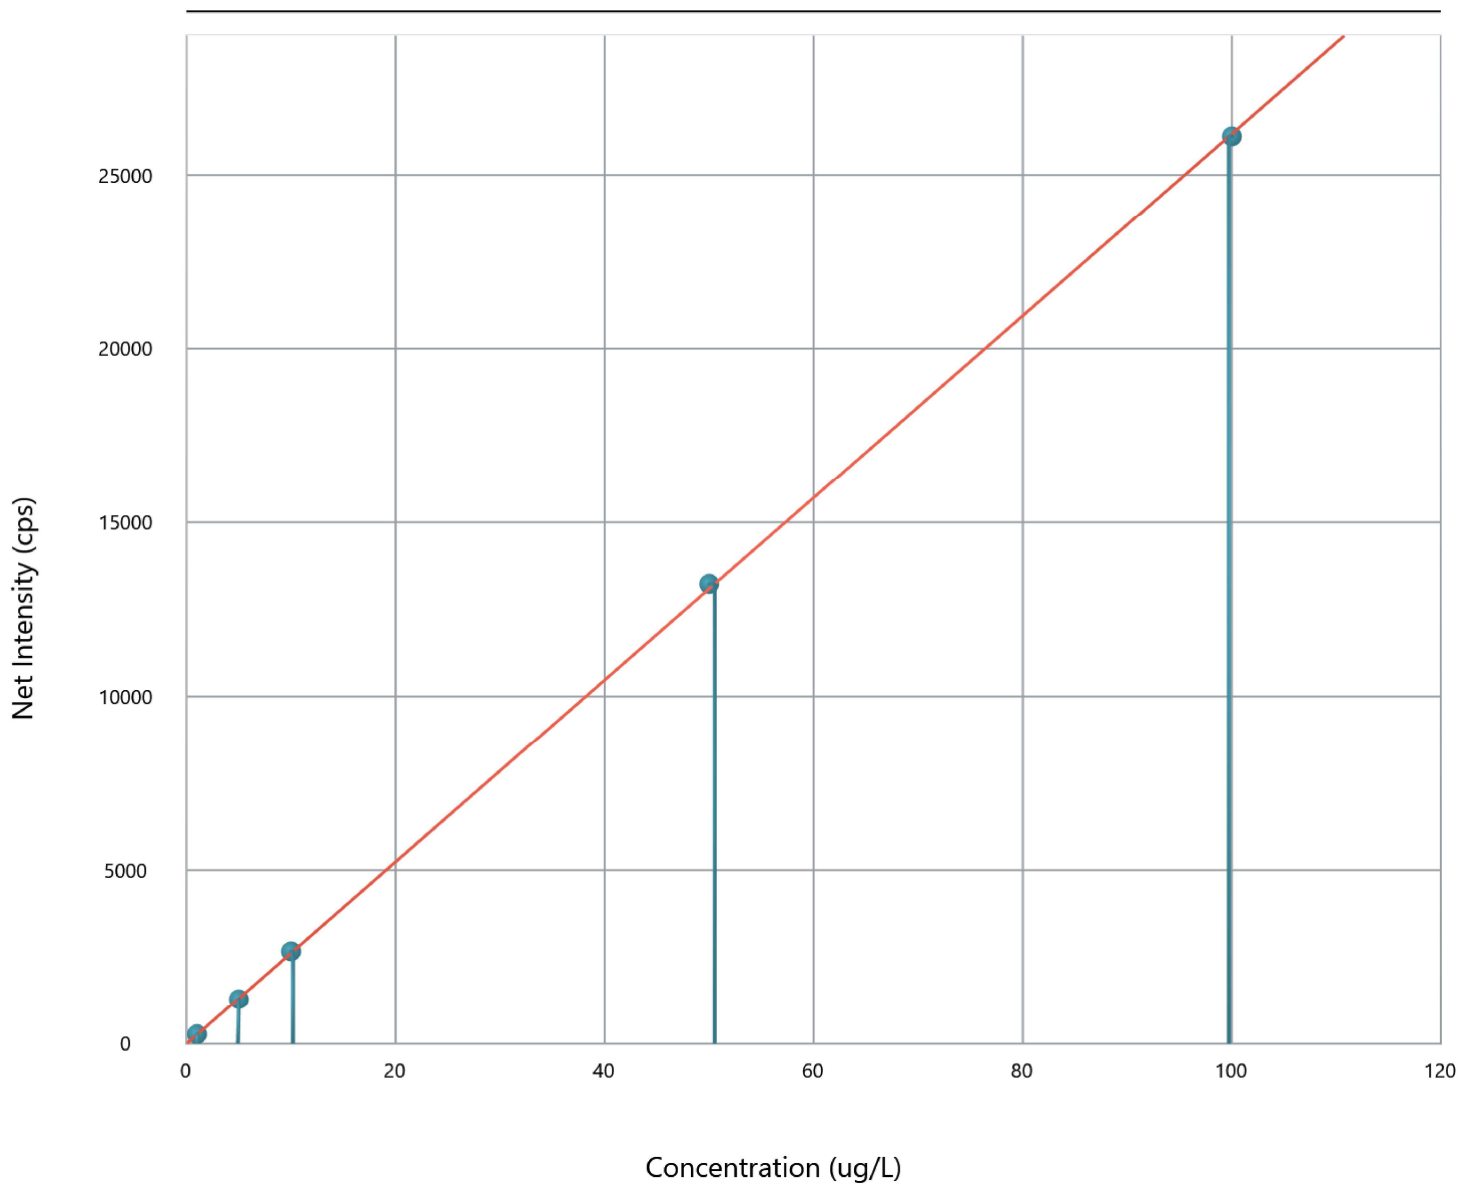

## Statistics

Eqn. :  $y = 262x + 0$   
 Cor.Coeff. : 0.999984  
 BEC : 0.033100 ug/L  
 DL : 0.046305 ug/L

## Calibration Table

|            | Net Intensity<br>Sb 121 (cps) | Apparent Conc.<br>Sb 121 (ug/L) |
|------------|-------------------------------|---------------------------------|
| Blank      | 8.7                           |                                 |
| Cal. Std.1 | 272.3                         | 1.040                           |
| Cal. Std.2 | 1287.4                        | 4.917                           |
| Cal. Std.3 | 2668.6                        | 10.192                          |
| Cal. Std.4 | 13228.5                       | 50.522                          |
| Cal. Std.5 | 26111.2                       | 99.724                          |
