# Supplementary material for: Advances in the Characterization of Usnea barbata (L.) Weber ex F.H. Wigg from Călimani Mountains, Romania
Source: MDPI journal article supplement (doi:10.3390/app12094234), 2022-04-22
Supplement: s1 [file s1]

Archive with 5 entries (5 files):
- Figure S1.jpg
- Figure S2.pdf
- Figure S3.pdf
- ICP-MS Standard solutions - Certificates of analysis.pdf
- ICP-MS Tables S1¿CS5.pdf
