# Supplementary material for: Advances in the Characterization of Usnea barbata (L.) Weber ex F.H. Wigg from Călimani Mountains, Romania
Source: MDPI journal article supplement (doi:10.3390/app12094234), 2022-04-22
Supplement: s1 [file s1 › Figure S3.pdf]

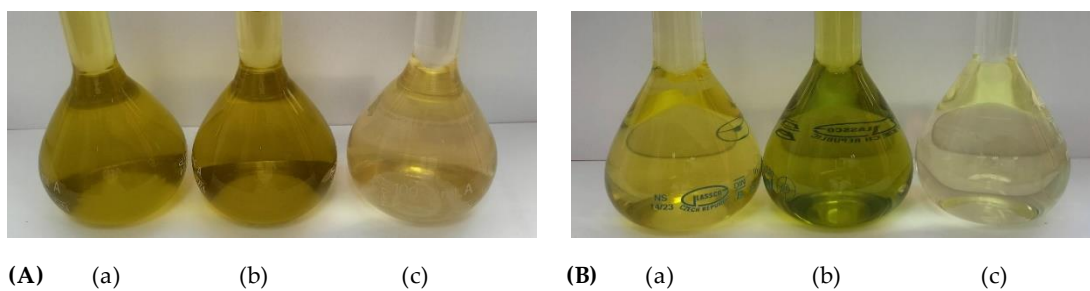

**Figure S3.** Extracts in ethanol 96% (A) and acetone (B) from dried *U. barbata* lichen - *dUB* (a), medulla-cortex - *mcUB* (b) and central cord - *ccUB* (c).
