# Supplementary material for: Advances in the Characterization of Usnea barbata (L.) Weber ex F.H. Wigg from Călimani Mountains, Romania
Source: MDPI journal article supplement (doi:10.3390/app12094234), 2022-04-22
Supplement: s1 [file s1 › ICP-MS Standard solutions - Certificates of analysis.pdf]

# PerkinElmer Pure Plus

Atomic Spectroscopy Standard

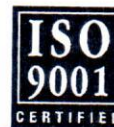

## Certificate of Analysis

PerkinElmer Number: N9303726 Lot No: CL11-127ALY1  
Element and Matrix: 1000 µg/mL Aluminum in 2% HNO<sub>3</sub>  
Starting Material: Aluminum Metal  
Starting Material Lot No: 01171B  
Density: 1.015 g/mL @ 20°C

Certification Date: NOV - - 2020  
Expiration Date: MAY 30 2022

### Trace Metallic Impurities in the Actual Solution via ICP / ICP-MS Analysis:

| Element | µg/L  |
|---------|-------|---------|-------|---------|-------|---------|-------|---------|-------|
| Ag      | 1     | Dy      | <0.05 | Li      | <0.2  | Pt      | 0.05  | Tb      | <0.03 |
| As      | 0.7   | Er      | <0.03 | Lu      | <0.01 | Rb      | <0.08 | Te      | 0.4   |
| Au      | 0.1   | Eu      | <0.02 | Mg      | 0.6   | Re      | <0.03 | Th      | <0.02 |
| B       | 1     | Fe      | 0.2   | Mn      | 0.6   | Rh      | 1     | Ti      | <0.2  |
| Ba      | 0.3   | Ga      | <0.3  | Mo      | <0.5  | Ru      | <0.2  | Tl      | <0.2  |
| Be      | <0.8  | Gd      | <0.09 | Na      | 4     | Sb      | <0.09 | Tm      | <0.01 |
| Bi      | <0.3  | Ge      | <0.5  | Nb      | <0.1  | Sc      | <0.2  | U       | <0.01 |
| Ca      | 10    | Hf      | <0.03 | Nd      | 0.05  | Se      | <8    | V       | <0.05 |
| Cd      | <0.2  | Hg      | 0.4   | Ni      | <0.6  | Si      | 100   | W       | 0.3   |
| Ce      | <0.04 | Ho      | <0.02 | P       | <200  | Sm      | <0.04 | Y       | 0.07  |
| Co      | 0.2   | In      | <0.04 | Pb      | <0.03 | Sn      | 0.2   | Yb      | <0.03 |
| Cr      | <0.5  | Ir      | <0.3  | Pd      | 0.5   | Sr      | 0.04  | Zn      | <0.7  |
| Cs      | <0.09 | K       | 1     | Pr      | <0.02 | Ta      | <0.5  | Zr      | <0.2  |
| Cu      | 2     | La      | <0.03 |         |       |         |       |         |       |

### Traceability Documentation for Solution Standard:

Certified Value: 1002 µg/mL ±5 µg/mL (refer to side 2)

Certified Value is Traceable to: NIST SRM #3101a

\* Classical Wet Assay: 1003 µg/mL

Method: Precipitation using 8 Hydroxy Quinoline. Filter, dry and weigh as Al(C<sub>9</sub>H<sub>6</sub>NO)<sub>3</sub>.

\* Instrumental Analysis using OPTIMA 7300 DV ICP Spectrometer: 1000 µg/mL  
via NIST SRM #3101a

We guarantee that our PerkinElmer Pure Plus Atomic Spectroscopy Standards are stable and accurate to ±0.5% of certified concentration until the expiration date, provided the standards are kept tightly capped and stored under normal laboratory conditions. This value is the sum of cumulative errors associated with the analytical determinations, pipetting, and diluting to final volume. For these solutions we use high purity acids, ASTM Type 1 water (18 megohm double deionized), and leached, triple-rinsed bottles. All glassware used is class A.

Certifying Officer:

*Y. Parikh*

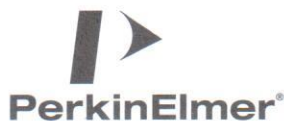

PerkinElmer, Inc.

U.S.A. Tel: 1-203-925-4600  
U.S.A. Toll Free: 1-800-762-4000

Visit [www.perkinelmer.com/lasoffices](http://www.perkinelmer.com/lasoffices) for a complete listing of our global offices.

## PerkinElmer Pure Plus

PerkinElmer Number: N9303727  
 Element and Matrix: 1000 µg/mL Arsenic in 2% HNO<sub>3</sub>  
 Starting Material: Arsenic Metal  
 Starting Material Lot No: 12171B  
 Density: 1.010 g/mL @ 20°C

Lot No: CL12-08ASY1  
 Certification Date: DEC -- 2020  
 Expiration Date: JUN 30 2022

### Trace Metallic Impurities in the Actual Solution via ICP / ICP-MS Analysis:

| Element | µg/L  |
|---------|-------|---------|-------|---------|-------|---------|-------|---------|-------|
| Ag      | <0.4  | Dy      | <0.01 | Li      | <0.2  | Pt      | <0.04 | Tb      | <0.01 |
| Al      | 0.6   | Er      | <0.01 | Lu      | <0.01 | Rb      | <0.03 | Te      | <0.5  |
| Au      | <0.03 | Eu      | <0.01 | Mg      | 0.2   | Re      | <0.08 | Th      | <0.01 |
| B       | <2    | Fe      | 0.7   | Mn      | 0.1   | Rh      | <0.07 | Ti      | <0.2  |
| Ba      | <0.06 | Ga      | <0.1  | Mo      | <0.1  | Ru      | <0.08 | Tl      | <0.2  |
| Be      | <0.05 | Gd      | <0.03 | Na      | 2     | Sb      | <0.03 | Tm      | <0.01 |
| Bi      | <0.02 | Ge      | <0.4  | Nb      | 0.2   | Sc      | <0.05 | U       | <0.03 |
| Ca      | 3     | Hf      | <0.03 | Nd      | <0.01 | Se      | <10   | V       | 0.05  |
| Cd      | <0.1  | Hg      | <0.3  | Ni      | <0.3  | Si      | <100  | W       | <0.2  |
| Ce      | 0.1   | Ho      | <0.01 | P       | <300  | Sm      | <0.01 | Y       | <0.03 |
| Co      | <0.2  | In      | 2     | Pb      | <0.3  | Sn      | 1     | Yb      | <0.01 |
| Cr      | <0.4  | Ir      | <0.09 | Pd      | <0.07 | Sr      | <0.03 | Zn      | 0.6   |
| Cs      | <0.02 | K       | 4     | Pr      | <0.01 | Ta      | <0.2  | Zr      | <0.2  |
| Cu      | <0.3  | La      | 0.01  |         |       |         |       |         |       |

### Traceability Documentation for Solution Standard:

Certified Value: 1000 µg/mL ±5 µg/mL (refer to side 2)  
 Certified Value is Traceable to: NIST SRM #3103a  
 \* Classical Wet Assay: 1000 µg/mL  
 Method: Precipitation using Silver Nitrate. Filter, dry, and weigh as Ag<sub>3</sub>AsO<sub>4</sub>.

\*Instrument Analysis using ICP Spectrometer: 1000 µg/mL  
 via NIST SRM #3103a

We guarantee that our PerkinElmer Pure Plus Atomic Spectroscopy Standards are stable and accurate to ±0.5% of certified concentration until the expiration date, provided the standards are kept tightly capped and stored under normal laboratory conditions. This value is the sum of cumulative errors associated with the analytical determinations, pipetting, and diluting to final volume. For these solutions we use high purity acids, ASTM Type 1 water (18 megohm double deionized), and leached, triple-rinsed bottles. All glassware used is class A.

Certifying Officer:

Y. Parikh  
 Yogesh Parikh, Senior Spectroscopist

## PerkinElmer Pure

PerkinElmer Number: N9300181  
 Element and Matrix: 1000 µg/mL Barium in 2% HNO<sub>3</sub>  
 Starting Material: Barium Nitrate  
 Starting Material Lot No: 05161C  
 Density: 1.011 g/mL @ 20°C

Lot No: 25-31BAY1  
 Certification Date: **MAR - - 2021**  
 Expiration Date: **SEP 30 2022**

### Trace Metallic Impurities in the Actual Solution via ICP / ICP-MS Analysis:

| Element | µg/mL  |
|---------|--------|---------|--------|---------|--------|---------|--------|---------|--------|
| Ag      | <0.001 | Dy      | <0.001 | Li      | <0.001 | Pt      | <0.001 | Tb      | <0.001 |
| Al      | <0.004 | Er      | <0.001 | Lu      | <0.001 | Rb      | <0.001 | Te      | <0.001 |
| As      | <0.001 | Eu      | <0.01  | Mg      | <0.001 | Re      | <0.001 | Th      | <0.001 |
| Au      | <0.001 | Fe      | <0.004 | Mn      | <0.001 | Rh      | <0.001 | Ti      | <0.001 |
| B       | <0.001 | Ga      | <0.001 | Mo      | <0.001 | Ru      | <0.001 | Tl      | <0.001 |
| Be      | <0.001 | Gd      | 0.001  | Na      | 0.005  | Sb      | <0.001 | Tm      | <0.001 |
| Bi      | <0.003 | Ge      | <0.002 | Nb      | <0.001 | Sc      | <0.001 | U       | <0.001 |
| Ca      | 0.01   | Hf      | <0.001 | Nd      | <0.001 | Se      | <0.02  | V       | <0.001 |
| Cd      | <0.001 | Hg      | <0.001 | Ni      | <0.001 | Si      | <0.1   | W       | <0.001 |
| Ce      | <0.001 | Ho      | <0.001 | P       | <0.5   | Sm      | 0.001  | Y       | 0.007  |
| Co      | <0.001 | In      | <0.001 | Pb      | <0.001 | Sn      | <0.001 | Yb      | <0.001 |
| Cr      | <0.001 | Ir      | <0.001 | Pd      | <0.001 | Sr      | 0.003  | Zn      | 0.006  |
| Cs      | <0.001 | K       | 0.002  | Pr      | <0.001 | Ta      | <0.001 | Zr      | <0.001 |
| Cu      | <0.001 | La      | 0.009  |         |        |         |        |         |        |

### Traceability Documentation for Solution Standard:

Certified Value: 999 µg/mL ±5 µg/mL (refer to side 2)  
 Certified Value is Traceable to: NIST SRM #3104a  
 \* Classical Wet Assay: 997 µg/mL  
 Method: Precipitation using Sulfuric Acid. Filter, ignite, and weigh as BaSO<sub>4</sub>.

\*Instrument Analysis using ICP Spectrometer: 1000 µg/mL  
 via NIST SRM #3104a

We guarantee that our PerkinElmer Pure Atomic Spectroscopy Standards are stable and accurate to ±0.5% of certified concentration until the expiration date, provided the standards are kept tightly capped and stored under normal laboratory conditions. This value is the sum of cumulative errors associated with the analytical determinations, pipetting, and diluting to final volume. For these solutions we use high purity acids, ASTM Type 1 water (18 megohm double deionized), and leached, triple-rinsed bottles. All glassware used is class A.

Certifying Officer: Y. Parikh  
 Yogesh Parikh, Senior Spectroscopist

# PerkinElmer Pure Plus

Atomic Spectroscopy Standard

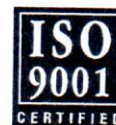

## Certificate of Analysis

PerkinElmer Number: N9303734 Lot No: CL11-132CDY1  
Element and Matrix: 1000 µg/mL Cadmium in 2% HNO<sub>3</sub>  
Starting Material: Cadmium Oxide  
Starting Material Lot No: 11151A

Density: 1.010 g/mL @ 20°C

Certification Date: **AUG -- 2020**

Expiration Date: **FEB 28 2022**

### Trace Metallic Impurities in the Actual Solution via ICP / ICP-MS Analysis:

| Element | µg/L  |
|---------|-------|---------|-------|---------|-------|---------|-------|---------|-------|
| Ag      | <0.1  | Dy      | <0.04 | Li      | <0.3  | Pt      | <0.2  | Tb      | 0.01  |
| Al      | 2     | Er      | <0.05 | Lu      | <0.01 | Rb      | <0.09 | Te      | <2    |
| As      | <0.6  | Eu      | 2     | Mg      | 0.3   | Re      | <0.03 | Th      | <0.02 |
| Au      | <0.1  | Fe      | 3     | Mn      | <1    | Rh      | <0.8  | Ti      | <0.09 |
| B       | 0.9   | Ga      | <0.2  | Mo      | <0.2  | Ru      | <0.2  | Tl      | <0.2  |
| Ba      | <0.5  | Gd      | <0.1  | Na      | 3     | Sb      | <0.04 | Tm      | <0.01 |
| Be      | <0.2  | Ge      | <1    | Nb      | <0.5  | Sc      | <0.2  | U       | <0.01 |
| Bi      | <0.01 | Hf      | <0.04 | Nd      | <0.05 | Se      | <0.5  | V       | <0.3  |
| Ca      | 8     | Hg      | <0.3  | Ni      | <0.7  | Si      | <100  | W       | <0.3  |
| Ce      | <0.07 | Ho      | <0.01 | P       | <100  | Sm      | <0.01 | Y       | <0.05 |
| Co      | <0.1  | In      | 0.8   | Pb      | <0.03 | Sn      | <0.2  | Yb      | <0.05 |
| Cr      | 0.6   | Ir      | <0.2  | Pd      | <0.3  | Sr      | <0.04 | Zn      | 3     |
| Cs      | <0.1  | K       | 5     | Pr      | <0.05 | Ta      | <0.08 | Zr      | <0.5  |
| Cu      | <0.3  | La      | <0.07 |         |       |         |       |         |       |

### Traceability Documentation for Solution Standard:

Certified Value: 1000 µg/mL ±5 µg/mL (refer to side 2)

Certified Value is Traceable to: NIST SRM #3108

\* Classical Wet Assay: 998 µg/mL

Method: EDTA titration using Xylenol Orange as indicator. EDTA standardized against Pb(NO<sub>3</sub>)<sub>2</sub>  
NIST SRM #928.

\* Instrumental Analysis using OPTIMA 7300 DV ICP Spectrometer: 1001 µg/mL  
via NIST SRM #3108

We guarantee that our PerkinElmer Pure Plus Atomic Spectroscopy Standards are stable and accurate to ±0.5% of certified concentration until the expiration date, provided the standards are kept tightly capped and stored under normal laboratory conditions. This value is the sum of cumulative errors associated with the analytical determinations, pipetting, and diluting to final volume. For these solutions we use high purity acids, ASTM Type 1 water (18 megohm double deionized), and leached, triple-rinsed bottles. All glassware used is class A.

Certifying Officer: Y. Parish

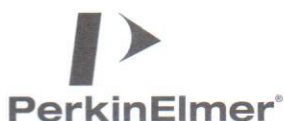

PerkinElmer, Inc.

U.S.A. Tel: 1-203-925-4600  
U.S.A. Toll Free: 1-800-762-4000

Visit [www.perkinelmer.com/lasoffices](http://www.perkinelmer.com/lasoffices) for a complete listing of our global offices.

## PerkinElmer Pure Plus

PerkinElmer Number: N9303733  
 Element and Matrix: 1000 µg/mL Calcium in 2% HNO<sub>3</sub>  
 Starting Material: Calcium Carbonate  
 Starting Material Lot No: 10141C  
 Density: 1.011 g/mL @ 20°C

Lot No: CL11-198CAY1  
 Certification Date: JAN - - 2021  
 Expiration Date: JUL 30 2022

### Trace Metallic Impurities in the Actual Solution via ICP / ICP-MS Analysis:

| Element | µg/L  |
|---------|-------|---------|-------|---------|-------|---------|-------|---------|-------|
| Ag      | <0.2  | Dy      | <0.01 | Li      | 0.3   | Pt      | <0.08 | Tb      | <0.01 |
| Al      | 2     | Er      | <0.01 | Lu      | <0.02 | Rb      | <0.02 | Te      | <2    |
| As      | 0.6   | Eu      | <0.02 | Mg      | 0.4   | Re      | <0.02 | Th      | <0.04 |
| Au      | <0.3  | Fe      | <2    | Mn      | <0.3  | Rh      | <0.04 | Ti      | 2     |
| B       | <2    | Ga      | <0.06 | Mo      | <0.2  | Ru      | <0.6  | Tl      | <0.9  |
| Ba      | 1     | Gd      | <0.01 | Na      | 2     | Sb      | <0.3  | Tm      | <0.01 |
| Be      | <0.09 | Ge      | <0.5  | Nb      | <0.04 | Sc      | <0.4  | U       | <0.01 |
| Bi      | <0.01 | Hf      | <0.01 | Nd      | <0.01 | Se      | <20   | V       | <0.08 |
| Cd      | <0.09 | Hg      | <0.7  | Ni      | <0.7  | Si      | <100  | W       | <0.6  |
| Ce      | 0.4   | Ho      | <0.01 | P       | <200  | Sm      | <0.01 | Y       | <0.02 |
| Co      | <0.2  | In      | <0.04 | Pb      | 0.05  | Sn      | <0.1  | Yb      | <0.01 |
| Cr      | <0.8  | Ir      | <0.1  | Pd      | <0.4  | Sr      | 10    | Zn      | <2    |
| Cs      | 0.1   | K       | 2     | Pr      | <0.01 | Ta      | <0.08 | Zr      | <0.2  |
| Cu      | <0.3  | La      | 0.2   |         |       |         |       |         |       |

### Traceability Documentation for Solution Standard:

Certified Value: 1000 µg/mL ±5 µg/mL (refer to side 2)

Certified Value is Traceable to: NIST SRM #3109a

\* Classical Wet Assay: 999 µg/mL

Method: EDTA titration using Hydroxy Naphthol Blue as indicator. EDTA standardized against Pb(NO<sub>3</sub>)<sub>2</sub>  
 NIST SRM #928

\*Instrument Analysis using ICP Spectrometer: 1000 µg/mL  
 via NIST SRM #3109a

We guarantee that our PerkinElmer Pure Plus Atomic Spectroscopy Standards are stable and accurate to ±0.5% of certified concentration until the expiration date, provided the standards are kept tightly capped and stored under normal laboratory conditions. This value is the sum of cumulative errors associated with the analytical determinations, pipetting, and diluting to final volume. For these solutions we use high purity acids, ASTM Type 1 water (18 megohm double deionized), and leached, triple-rinsed bottles. All glassware used is class A.

Certifying Officer:

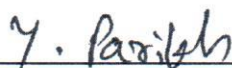  
 Yogesh Parikh, Senior Spectroscopist

PerkinElmer Pure Plus

PerkinElmer Number: N9303736  
 Element and Matrix: 1000 µg/mL Chromium in 2% HNO<sub>3</sub>  
 Starting Material: Chromium(III) Nitrate Nonahydrate  
 Starting Material Lot No: 03161L  
 Density: 1.013 g/mL @ 20°C

Lot No: CL11-141CRY1  
 Certification Date: NOV - - 2020  
 Expiration Date: MAY 30 2022

Trace Metallic Impurities in the Actual Solution via ICP / ICP-MS Analysis:

| Element | µg/L  |
|---------|-------|---------|-------|---------|-------|---------|-------|---------|-------|
| Ag      | <0.6  | Dy      | <0.02 | Li      | <0.3  | Pt      | <0.03 | Tb      | <0.01 |
| Al      | 4     | Er      | <0.01 | Lu      | <0.01 | Rb      | 10    | Te      | <0.7  |
| As      | 1     | Eu      | <0.01 | Mg      | 10    | Re      | <0.07 | Th      | <0.01 |
| Au      | <0.4  | Fe      | 30    | Mn      | 0.5   | Rh      | 2     | Ti      | 1     |
| B       | <2    | Ga      | 2     | Mo      | <2    | Ru      | 20    | Tl      | <0.2  |
| Ba      | 0.1   | Gd      | <0.03 | Na      | 7     | Sb      | <0.7  | Tm      | <0.01 |
| Be      | 0.07  | Ge      | <0.6  | Nb      | 2     | Sc      | <0.7  | U       | <0.01 |
| Bi      | <0.05 | Hf      | 0.04  | Nd      | <0.01 | Se      | <20   | V       | 2     |
| Ca      | 50    | Hg      | <0.07 | Ni      | 0.5   | Si      | <100  | W       | <0.4  |
| Cd      | <0.2  | Ho      | <0.01 | P       | <400  | Sm      | <0.01 | Y       | <0.02 |
| Ce      | 0.3   | In      | 0.2   | Pb      | 0.1   | Sn      | <0.8  | Yb      | 0.04  |
| Co      | <0.2  | Ir      | <0.2  | Pd      | <0.2  | Sr      | <0.4  | Zn      | 20    |
| Cs      | <0.03 | K       | 4     | Pr      | 0.01  | Ta      | <0.1  | Zr      | 0.3   |
| Cu      | 4     | La      | <0.04 |         |       |         |       |         |       |

Traceability Documentation for Solution Standard:

Certified Value: 1003 µg/mL ±5 µg/mL (refer to side 2)  
 Certified Value is Traceable to: NIST SRM #3112a  
 \* Classical Wet Assay: 1004 µg/mL  
 Method: Precipitation using Ammonium Hydroxide. Filter, ignite, and weigh as Cr<sub>2</sub>O<sub>3</sub>.

\*Instrument Analysis using ICP Spectrometer: 1001 µg/mL  
 via NIST SRM #3112a

We guarantee that our PerkinElmer Pure Plus Atomic Spectroscopy Standards are stable and accurate to ±0.5% of certified concentration until the expiration date, provided the standards are kept tightly capped and stored under normal laboratory conditions. This value is the sum of cumulative errors associated with the analytical determinations, pipetting, and diluting to final volume. For these solutions we use high purity acids, ASTM Type 1 water (18 megohm double deionized), and leached, triple-rinsed bottles. All glassware used is class A.

Certifying Officer: Y. Parikh  
 Yogesh Parikh, Senior Spectroscopist

## PerkinElmer Pure Plus

PerkinElmer Number: N9303735  
 Element and Matrix: 1000 µg/mL Cobalt in 2% HNO<sub>3</sub>  
 Starting Material: Cobalt Metal (powder)  
 Starting Material Lot No: 10181G  
 Density: 1.011 g/mL @ 20°C

Lot No: CL11-168COY1  
 Certification Date: OCT - - 2020  
 Expiration Date: APR 30 2022

### Trace Metallic Impurities in the Actual Solution via ICP / ICP-MS Analysis:

| Element | µg/L  |
|---------|-------|---------|-------|---------|-------|---------|-------|---------|-------|
| Ag      | <0.5  | Dy      | <0.01 | Li      | <0.5  | Pt      | <0.2  | Tb      | <0.01 |
| Al      | 1     | Er      | <0.01 | Lu      | <0.01 | Rb      | <0.2  | Te      | <0.5  |
| As      | <20   | Eu      | <0.01 | Mg      | 0.2   | Re      | <0.05 | Th      | <0.08 |
| Au      | <0.2  | Fe      | <0.8  | Mn      | <0.4  | Rh      | <0.09 | Ti      | 0.1   |
| B       | <1    | Ga      | <0.09 | Mo      | <0.1  | Ru      | <0.2  | Tl      | <0.8  |
| Ba      | <0.01 | Gd      | <0.03 | Na      | <0.3  | Sb      | <0.06 | Tm      | <0.01 |
| Be      | 0.1   | Ge      | 0.4   | Nb      | <0.3  | Sc      | <0.08 | U       | <0.01 |
| Bi      | <0.6  | Hf      | <0.07 | Nd      | <0.01 | Se      | <4    | V       | <0.1  |
| Ca      | 8     | Hg      | <0.3  | Ni      | 2     | Si      | <200  | W       | <0.5  |
| Cd      | <0.3  | Ho      | <0.01 | P       | <400  | Sm      | <0.01 | Y       | <0.02 |
| Ce      | <0.01 | In      | <0.06 | Pb      | <0.3  | Sn      | <0.1  | Yb      | <0.01 |
| Cr      | 0.2   | Ir      | <0.2  | Pd      | <0.3  | Sr      | <0.04 | Zn      | 1     |
| Cs      | <0.2  | K       | 3     | Pr      | <0.01 | Ta      | <0.7  | Zr      | <0.3  |
| Cu      | <0.2  | La      | <0.02 |         |       |         |       |         |       |

### Traceability Documentation for Solution Standard:

Certified Value: 1001 µg/mL ±5 µg/mL (refer to side 2)

Certified Value is Traceable to: NIST SRM #3113

\* Classical Wet Assay: 1003 µg/mL

Method: EDTA titration using Xylenol Orange as indicator. EDTA standardized against Pb(NO<sub>3</sub>)<sub>2</sub> NIST SRM # 928.

\*Instrument Analysis using ICP Spectrometer: 999 µg/mL  
 via NIST SRM #3113

We guarantee that our PerkinElmer Pure Plus Atomic Spectroscopy Standards are stable and accurate to ±0.5% of certified concentration until the expiration date, provided the standards are kept tightly capped and stored under normal laboratory conditions. This value is the sum of cumulative errors associated with the analytical determinations, pipetting, and diluting to final volume. For these solutions we use high purity acids, ASTM Type 1 water (18 megohm double deionized), and leached, triple-rinsed bottles. All glassware used is class A.

Certifying Officer: Y. Parikh  
 Yogesh Parikh, Senior Spectroscopist

# PerkinElmer Pure Plus

Atomic Spectroscopy Standard

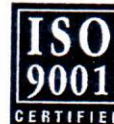

## Certificate of Analysis

PerkinElmer Number: N9303737 Lot No: CL11-136CUIY1  
Element and Matrix: 1000 µg/mL Copper in 2% HNO<sub>3</sub>  
Starting Material: Copper Metal  
Starting Material Lot No: 111411

Density: 1.011 g/mL @ 20°C

Certification Date: DEC -- 2020  
Expiration Date: JUN 30 2022

### Trace Metallic Impurities in the Actual Solution via ICP / ICP-MS Analysis:

| Element | µg/L  |
|---------|-------|---------|-------|---------|-------|---------|-------|---------|-------|
| Ag      | <0.2  | Dy      | <0.01 | Li      | <0.2  | Pt      | <0.04 | Tb      | <0.01 |
| Al      | 0.5   | Er      | <0.01 | Lu      | <0.01 | Rb      | <0.07 | Te      | <0.6  |
| As      | <0.3  | Eu      | <0.01 | Mg      | <0.3  | Re      | <0.01 | Th      | <0.03 |
| Au      | <0.3  | Fe      | <0.9  | Mn      | <0.6  | Rh      | 40    | Ti      | <0.3  |
| B       | <0.8  | Ga      | <0.06 | Mo      | <0.2  | Ru      | 0.7   | Tl      | <1    |
| Ba      | <0.08 | Gd      | <0.01 | Na      | <1    | Sb      | <0.2  | Tm      | <0.01 |
| Be      | <0.5  | Ge      | <0.6  | Nb      | <0.05 | Sc      | <0.2  | U       | <0.01 |
| Bi      | <0.02 | Hf      | <0.01 | Nd      | <0.01 | Se      | <10   | V       | <0.1  |
| Ca      | 6     | Hg      | <4    | Ni      | <0.2  | Si      | <100  | W       | <0.1  |
| Cd      | <0.1  | Ho      | <0.01 | P       | <100  | Sm      | <0.01 | Y       | <0.04 |
| Ce      | 0.03  | In      | <0.02 | Pb      | <0.03 | Sn      | <0.2  | Yb      | <0.01 |
| Co      | <0.3  | Ir      | <3    | Pd      | <0.7  | Sr      | <0.05 | Zn      | 4     |
| Cr      | <1    | K       | 2     | Pr      | <0.01 | Ta      | <0.1  | Zr      | <0.2  |
| Cs      | <0.05 | La      | <0.01 |         |       |         |       |         |       |

### Traceability Documentation for Solution Standard:

Certified Value: 1002 µg/mL ±5 µg/mL (refer to side 2)

Certified Value is Traceable to: NIST SRM #3114

\* Classical Wet Assay: 1002 µg/mL

Method: EDTA titration using PAN as indicator. EDTA standardized against Pb(NO<sub>3</sub>)<sub>2</sub> NIST SRM #9 28.

\* Instrumental Analysis using OPTIMA 7300 DV ICP Spectrometer: 1001 µg/mL  
via NIST SRM #3114

We guarantee that our PerkinElmer Pure Plus Atomic Spectroscopy Standards are stable and accurate to ±0.5% of certified concentration until the expiration date, provided the standards are kept tightly capped and stored under normal laboratory conditions. This value is the sum of cumulative errors associated with the analytical determinations, pipetting, and diluting to final volume. For these solutions we use high purity acids, ASTM Type 1 water (18 megohm double deionized), and leached, triple-rinsed bottles. All glassware used is class A.

Certifying Officer: Y. Parikh

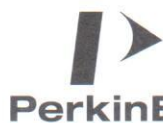

PerkinElmer, Inc.

U.S.A. Tel: 1-203-925-4600  
U.S.A. Toll Free: 1-800-762-4000

Visit [www.perkinelmer.com/lasoffices](http://www.perkinelmer.com/lasoffices) for a complete listing of our global offices.

## PerkinElmer Pure Plus

PerkinElmer Number: N9303738  
 Element and Matrix: 1000 µg/mL Iron in 2% HNO<sub>3</sub>  
 Starting Material: Iron Metal  
 Starting Material Lot No: 10141F  
 Density: 1.013 g/mL @ 20°C

Lot No: CL12-36FEY1  
 Certification Date: **MAY - - 2021**  
 Expiration Date: **NOV 30 2022**

### Trace Metallic Impurities in the Actual Solution via ICP / ICP-MS Analysis:

| Element | µg/L  |
|---------|-------|---------|-------|---------|-------|---------|-------|---------|-------|
| Ag      | <0.2  | Cu      | 2     | Li      | <0.1  | Pt      | <0.02 | Tb      | <0.01 |
| Al      | 0.6   | Dy      | <0.01 | Lu      | <0.01 | Rb      | 0.04  | Te      | <0.1  |
| As      | 0.5   | Er      | <0.01 | Mg      | 0.4   | Re      | <0.04 | Th      | <0.01 |
| Au      | <0.2  | Eu      | <0.01 | Mn      | 9     | Rh      | <0.1  | Ti      | <0.2  |
| B       | <0.1  | Ga      | 0.1   | Mo      | 0.4   | Ru      | 0.06  | Tl      | <0.09 |
| Ba      | <0.07 | Gd      | <0.01 | Na      | 1     | Sb      | 1     | Tm      | <0.01 |
| Be      | <0.3  | Ge      | <0.3  | Nb      | <0.02 | Sc      | <0.07 | U       | <0.01 |
| Bi      | <0.01 | Hf      | <0.01 | Nd      | <0.03 | Se      | <0.3  | V       | <0.3  |
| Ca      | 8     | Hg      | <0.2  | Ni      | 2     | Si      | <100  | W       | 0.3   |
| Cd      | <0.04 | Ho      | <0.01 | P       | <200  | Sm      | <0.01 | Y       | <0.09 |
| Ce      | <0.01 | In      | <0.03 | Pb      | 0.02  | Sn      | <0.2  | Yb      | <0.01 |
| Co      | 3     | Ir      | <0.04 | Pd      | <0.2  | Sr      | <0.06 | Zn      | 2     |
| Cr      | 1     | K       | 1     | Pr      | <0.01 | Ta      | <0.2  | Zr      | <0.2  |
| Cs      | <0.04 | La      | <0.01 |         |       |         |       |         |       |

### Traceability Documentation for Solution Standard:

Certified Value: 1000 µg/mL ±5 µg/mL (refer to side 2)  
 Certified Value is Traceable to: NIST SRM #3126a  
 \* Classical Wet Assay: 1001 µg/mL  
 Method: Precipitation using Ammonium Hydroxide. Filter, ignite, and weigh as Fe<sub>2</sub>O<sub>3</sub>.

\*Instrument Analysis using ICP Spectrometer: 999 µg/mL  
 via NIST SRM #3126a

We guarantee that our PerkinElmer Pure Plus Atomic Spectroscopy Standards are stable and accurate to ±0.5% of certified concentration until the expiration date, provided the standards are kept tightly capped and stored under normal laboratory conditions. This value is the sum of cumulative errors associated with the analytical determinations, pipetting, and diluting to final volume. For these solutions we use high purity acids, ASTM Type 1 water (18 megohm double deionized), and leached, triple-rinsed bottles. All glassware used is class A.

Certifying Officer: Y. Parikh  
 Yogesh Parikh, Senior Spectroscopist

## PerkinElmer Pure Plus

PerkinElmer Number: N9303748  
 Element and Matrix: 1000 µg/mL Lead in 2% HNO<sub>3</sub>  
 Starting Material: Lead(II) Oxide  
 Starting Material Lot No: 01851R  
 Density: 1.010 g/mL @ 20°C

Lot No: CL12-64PBY1  
 Certification Date: DEC -- 2020  
 Expiration Date: JUN 30 2022

### Trace Metallic Impurities in the Actual Solution via ICP / ICP-MS Analysis:

| Element | µg/L  |
|---------|-------|---------|-------|---------|-------|---------|-------|---------|-------|
| Ag      | 1     | Cu      | <0.6  | La      | <0.04 | Pt      | <0.3  | Tb      | <0.01 |
| Al      | 0.7   | Dy      | <0.01 | Li      | <0.6  | Rb      | <0.07 | Te      | <0.2  |
| As      | <0.9  | Er      | <0.01 | Lu      | <0.01 | Re      | <0.03 | Th      | <0.01 |
| Au      | <0.3  | Eu      | <0.01 | Mg      | 1     | Rh      | 5     | Ti      | <0.4  |
| B       | <0.8  | Fe      | 3     | Mn      | <0.9  | Ru      | <0.3  | Tl      | 0.3   |
| Ba      | 0.07  | Ga      | <0.03 | Mo      | <0.2  | Sb      | <0.09 | Tm      | <0.01 |
| Be      | <2    | Gd      | <0.04 | Na      | 4     | Sc      | <0.4  | U       | <0.01 |
| Bi      | 10    | Ge      | <0.4  | Nb      | <0.3  | Se      | <8    | V       | <0.2  |
| Ca      | 8     | Hf      | <0.01 | Nd      | <0.04 | Si      | <100  | W       | <0.6  |
| Cd      | <0.2  | Hg      | <0.2  | Ni      | <0.5  | Sm      | <0.01 | Y       | <0.07 |
| Ce      | <0.02 | Ho      | <0.01 | P       | <400  | Sn      | <0.07 | Yb      | <0.01 |
| Co      | <0.2  | In      | <0.04 | Pd      | <0.2  | Sr      | <0.1  | Zn      | 0.7   |
| Cr      | <0.2  | Ir      | <0.04 | Pr      | <0.01 | Ta      | <0.08 | Zr      | <0.3  |
| Cs      | <0.03 | K       | 4     |         |       |         |       |         |       |

### Traceability Documentation for Solution Standard:

Certified Value: 1000 µg/mL ±5 µg/mL (refer to side 2)

Certified Value is Traceable to: NIST SRM #3128

\* Classical Wet Assay: 1001 µg/mL

Method: EDTA titration using Xylenol Orange as indicator. EDTA standardized against Pb(NO<sub>3</sub>)<sub>2</sub> NIST SRM #928

\*Instrument Analysis using ICP Spectrometer: 999 µg/mL

via NIST SRM #3128

We guarantee that our PerkinElmer Pure Plus Atomic Spectroscopy Standards are stable and accurate to ±0.5% of certified concentration until the expiration date, provided the standards are kept tightly capped and stored under normal laboratory conditions. This value is the sum of cumulative errors associated with the analytical determinations, pipetting, and diluting to final volume. For these solutions we use high purity acids, ASTM Type 1 water (18 megohm double deionized), and leached, triple-rinsed bottles. All glassware used is class A.

Certifying Officer: Y. Parikh  
 Yogesh Parikh, Senior Spectroscopist

PerkinElmer TruQ

PerkinElmer Number: N9303781  
 Element and Matrix: 1000 µg/mL Lithium in 2% HNO<sub>3</sub>  
 Starting Material: Lithium Carbonate  
 Starting Material Lot No: 11151C  
 Density: 1.015 g/mL @ 20°C

Lot No: 25-148LIY1  
 Certification Date: MAY - - 2021  
 Expiration Date: NOV 30 2022

Trace Metallic Impurities in the Actual Solution via ICP / ICP-MS Analysis:

| Element | µg/mL  |
|---------|--------|---------|--------|---------|--------|---------|--------|---------|--------|
| Ag      | <0.001 | Cu      | <0.002 | La      | <0.001 | Pt      | <0.001 | Tb      | <0.001 |
| Al      | 0.003  | Dy      | <0.001 | Lu      | <0.001 | Rb      | <0.001 | Te      | <0.001 |
| As      | <0.001 | Er      | <0.001 | Mg      | <0.001 | Re      | <0.001 | Th      | <0.001 |
| Au      | <0.001 | Eu      | <0.001 | Mn      | <0.001 | Rh      | <0.001 | Ti      | <0.001 |
| B       | <0.02  | Fe      | <0.004 | Mo      | <0.001 | Ru      | <0.001 | Tl      | <0.001 |
| Ba      | 0.006  | Ga      | <0.001 | Na      | 0.02   | Sb      | <0.001 | Tm      | <0.001 |
| Be      | <0.001 | Gd      | <0.001 | Nb      | <0.001 | Sc      | <0.001 | U       | <0.001 |
| Bi      | <0.001 | Ge      | <0.002 | Nd      | <0.001 | Se      | <0.03  | V       | <0.001 |
| Ca      | 0.01   | Hf      | <0.001 | Ni      | <0.001 | Si      | <0.4   | W       | <0.001 |
| Cd      | <0.001 | Hg      | <0.001 | P       | <0.5   | Sm      | <0.001 | Y       | <0.001 |
| Ce      | <0.001 | Ho      | <0.001 | Pb      | <0.001 | Sn      | <0.001 | Yb      | <0.001 |
| Co      | <0.001 | In      | <0.001 | Pd      | <0.001 | Sr      | 0.002  | Zn      | 0.01   |
| Cr      | <0.001 | Ir      | <0.001 | Pr      | <0.001 | Ta      | <0.001 | Zr      | <0.001 |
| Cs      | <0.001 | K       | 0.003  |         |        |         |        |         |        |

Traceability Documentation for Solution Standard:

Certified Value: 1000 µg/mL ± 5 µg/mL (refer to side 2)  
 Certified Value is Traceable to: NIST SRM #3129a  
 \* Classical Wet Assay: 1001 µg/mL  
 Method: Evaporate to dryness. Fume with Sulfuric Acid. Ignite and weigh as Li<sub>2</sub>SO<sub>4</sub>

\*Instrument Analysis using ICP Spectrometer: 999 µg/mL  
 via NIST SRM #3129a

We guarantee that our PerkinElmer TruQ Atomic Spectroscopy Standards are stable and accurate to ±0.5% of certified concentration until the expiration date, provided the standards are kept tightly capped and stored under normal laboratory conditions. This value is the sum of cumulative errors associated with the analytical determinations, pipetting, and diluting to final volume. For these solutions we use high purity acids, ASTM Type 1 water (18 megohm double deionized), and leached, triple-rinsed bottles. All glassware used is class A.

Certifying Officer: Y. Parikh  
 Yogesh Parikh, Senior Spectroscopist

**PerkinElmer Pure Plus**

PerkinElmer Number: N9303743  
 Element and Matrix: 1000 µg/mL Magnesium in 2% HNO<sub>3</sub>  
 Starting Material: Magnesium Nitrate Hexahydrate  
 Starting Material Lot No: 11151G  
 Density: 1.013 g/mL @ 20°C

Lot No: CL12-62MGY1  
 Certification Date: **JAN - - 2021**  
 Expiration Date: **JUL 30 2022**

**Trace Metallic Impurities in the Actual Solution via ICP / ICP-MS Analysis:**

| Element | µg/L  |
|---------|-------|---------|-------|---------|-------|---------|-------|---------|-------|
| Ag      | <0.2  | Cu      | <0.2  | La      | 0.02  | Pt      | <0.2  | Tb      | <0.02 |
| Al      | 2     | Dy      | <0.04 | Li      | 1     | Rb      | <0.08 | Te      | <0.7  |
| As      | <0.8  | Er      | <0.01 | Lu      | <0.01 | Re      | <0.01 | Th      | <0.01 |
| Au      | <0.7  | Eu      | <0.02 | Mn      | 1     | Rh      | <0.02 | Ti      | 2     |
| B       | 2     | Fe      | 1     | Mo      | <0.1  | Ru      | <0.5  | Tl      | <0.05 |
| Ba      | <0.1  | Ga      | <0.07 | Na      | 30    | Sb      | <0.07 | Tm      | <0.03 |
| Be      | <0.2  | Gd      | <0.04 | Nb      | <0.04 | Sc      | 0.3   | U       | <0.02 |
| Bi      | <0.03 | Ge      | <0.8  | Nd      | <0.01 | Se      | <6    | V       | 0.2   |
| Ca      | 40    | Hf      | <0.03 | Ni      | 0.2   | Si      | <100  | W       | <0.07 |
| Cd      | <0.07 | Hg      | <0.1  | P       | <200  | Sm      | <0.03 | Y       | <0.03 |
| Ce      | 0.04  | Ho      | <0.03 | Pb      | <0.3  | Sn      | <0.07 | Yb      | <0.01 |
| Co      | 0.6   | In      | 0.03  | Pd      | <0.2  | Sr      | <0.1  | Zn      | 2     |
| Cr      | <1    | Ir      | <0.09 | Pr      | <0.01 | Ta      | <0.07 | Zr      | <0.1  |
| Cs      | 0.08  | K       | 4     |         |       |         |       |         |       |

**Traceability Documentation for Solution Standard:**

**Certified Value:** 998 µg/mL ±5 µg/mL (refer to side 2)

**Certified Value is Traceable to:** NIST SRM #3131a

**\* Classical Wet Assay:** 996 µg/mL

**Method:** EDTA titration using Eriochrome Black T as indicator. EDTA standardized against Pb(NO<sub>3</sub>)<sub>2</sub> NIST SRM #928.

**\*Instrument Analysis using ICP Spectrometer:** 1000 µg/mL  
 via NIST SRM #3131a

We guarantee that our PerkinElmer Pure Plus Atomic Spectroscopy Standards are stable and accurate to ±0.5% of certified concentration until the expiration date, provided the standards are kept tightly capped and stored under normal laboratory conditions. This value is the sum of cumulative errors associated with the analytical determinations, pipetting, and diluting to final volume. For these solutions we use high purity acids, ASTM Type 1 water (18 megohm double deionized), and leached, triple-rinsed bottles. All glassware used is class A.

Certifying Officer:

Y. Parikh  
 Yogesh Parikh, Senior Spectroscopist

## PerkinElmer Pure Plus

PerkinElmer Number: N9303744  
 Element and Matrix: 1000 µg/mL Manganese in 2% HNO<sub>3</sub>  
 Starting Material: Manganese Metal  
 Starting Material Lot No: 03181D  
 Density: 1.011 g/mL @ 20°C

Lot No: CL11-204MNY1  
 Certification Date: MAR - - 2021  
 Expiration Date: SEP 30 2022

### Trace Metallic Impurities in the Actual Solution via ICP / ICP-MS Analysis:

| Element | µg/L  |
|---------|-------|---------|-------|---------|-------|---------|-------|---------|-------|
| Ag      | <0.3  | Cu      | 1     | La      | 0.03  | Pt      | <0.08 | Tb      | <0.01 |
| Al      | 4     | Dy      | <0.01 | Li      | <0.3  | Rb      | <0.2  | Te      | <0.5  |
| As      | <0.2  | Er      | <0.01 | Lu      | <0.01 | Re      | <0.04 | Th      | <0.02 |
| Au      | <0.3  | Eu      | <0.02 | Mg      | 60    | Rh      | <0.2  | Ti      | <0.3  |
| B       | 8     | Fe      | 3     | Mo      | <0.6  | Ru      | <0.3  | Tl      | <0.6  |
| Ba      | <0.04 | Ga      | <0.06 | Na      | 6     | Sb      | <0.2  | Tm      | <0.01 |
| Be      | 0.1   | Gd      | <0.01 | Nb      | <0.07 | Sc      | <0.2  | U       | 0.01  |
| Bi      | <0.03 | Ge      | <3    | Nd      | <0.04 | Se      | <6    | V       | <0.03 |
| Ca      | 20    | Hf      | <0.01 | Ni      | 2     | Si      | <100  | W       | <0.2  |
| Cd      | <0.07 | Hg      | <0.4  | P       | <500  | Sm      | <0.04 | Y       | 0.4   |
| Ce      | 0.07  | Ho      | 0.01  | Pb      | 0.2   | Sn      | <0.04 | Yb      | <0.01 |
| Co      | 3     | In      | <0.05 | Pd      | <0.08 | Sr      | 2     | Zn      | 2     |
| Cr      | <1    | Ir      | <0.05 | Pr      | 0.02  | Ta      | <0.03 | Zr      | <0.2  |
| Cs      | <0.05 | K       | 3     |         |       |         |       |         |       |

### Traceability Documentation for Solution Standard:

Certified Value: 1003 µg/mL ±5 µg/mL (refer to side 2)

Certified Value is Traceable to: NIST SRM #3132

\* Classical Wet Assay: 1004 µg/mL

Method: EDTA titration using Eriochrome Black T as indicator. EDTA standardized against Pb(NO<sub>3</sub>)<sub>2</sub> NIST SRM #928.

\*Instrument Analysis using ICP Spectrometer: 1002 µg/mL  
 via NIST SRM #3132

We guarantee that our PerkinElmer Pure Plus Atomic Spectroscopy Standards are stable and accurate to ±0.5% of certified concentration until the expiration date, provided the standards are kept tightly capped and stored under normal laboratory conditions. This value is the sum of cumulative errors associated with the analytical determinations, pipetting, and diluting to final volume. For these solutions we use high purity acids, ASTM Type 1 water (18 megohm double deionized), and leached, triple-rinsed bottles. All glassware used is class A.

Certifying Officer: Y. Parikh  
 Yogesh Parikh, Senior Spectroscopist

# PerkinElmer Pure Plus

Atomic Spectroscopy Standard

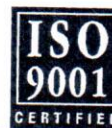

## Certificate of Analysis

PerkinElmer Number: N9300253

Lot No: CL11-119HGY1

Element and Matrix: 10 µg/mL Mercury in 5% HNO<sub>3</sub>

Starting Material: Mercury Metal

Starting Material Lot No: 03141E

Density: 1.024 g/mL @ 20°C

Certification Date: JUL - - 2020

Expiration Date: JAN 30 2022

### Trace Metallic Impurities in the Actual Solution via ICP / ICP-MS Analysis:

| Element | µg/L  |
|---------|-------|---------|-------|---------|-------|---------|-------|---------|-------|
| Ag      | <0.2  | Cu      | 2     | Li      | <0.3  | Pt      | <0.2  | Tb      | <0.01 |
| Al      | <0.9  | Dy      | <0.02 | Lu      | <0.01 | Rb      | <0.2  | Te      | <0.7  |
| As      | 0.4   | Er      | <0.02 | Mg      | 2     | Re      | <0.03 | Th      | <0.03 |
| Au      | <0.1  | Eu      | <0.02 | Mn      | <0.3  | Rh      | <0.03 | Ti      | <0.2  |
| B       | <0.4  | Fe      | <0.7  | Mo      | <0.2  | Ru      | <0.4  | Tl      | <0.8  |
| Ba      | <0.2  | Ga      | <0.07 | Na      | <1    | Sb      | <0.08 | Tm      | <0.01 |
| Be      | <0.5  | Gd      | <0.01 | Nb      | <0.2  | Sc      | <0.2  | U       | <0.01 |
| Bi      | <0.07 | Ge      | <0.7  | Nd      | <0.08 | Se      | <10   | V       | 0.1   |
| Ca      | <0.2  | Hf      | <0.04 | Ni      | <0.6  | Si      | <50   | W       | <0.3  |
| Cd      | <0.08 | Ho      | <0.01 | P       | <100  | Sm      | <0.03 | Y       | <0.03 |
| Ce      | <0.02 | In      | <0.06 | Pb      | <0.2  | Sn      | <0.08 | Yb      | <0.02 |
| Co      | <0.1  | Ir      | <0.05 | Pd      | <0.1  | Sr      | 0.1   | Zn      | 0.8   |
| Cr      | 0.2   | K       | 4     | Pr      | <0.01 | Ta      | <0.04 | Zr      | <0.08 |
| Cs      | <0.04 | La      | <0.02 |         |       |         |       |         |       |

### Traceability Documentation for Solution Standard:

Certified Value: 10.0 µg/mL ±0.1 µg/mL (refer to side 2)

Certified Value is Traceable to: NIST SRM #3133

\* Classical Wet Assay: 10.0 µg/mL

**Method:** This value was derived from dilution calculations of a Titrimetry analysis result of a Mercury concentrate. The concentrate was analyzed by Ammonium Thiocyanate titration using Ferric Nitrate as indicator.

\* Instrumental Analysis using OPTIMA 7300 DV ICP Spectrometer: 10.0 µg/mL  
via NIST SRM #3133

We guarantee that our PerkinElmer Pure Plus Atomic Spectroscopy Standards are stable and accurate to ±1% of certified concentration until the expiration date, provided the standards are kept tightly capped and stored under normal laboratory conditions. This value is the sum of cumulative errors associated with the analytical determinations, pipetting, and diluting to final volume. For these solutions we use high purity acids, ASTM Type 1 water (18 megohm double deionized), and leached, triple-rinsed bottles. All glassware used is class A.

Certifying Officer: Y. Parikh

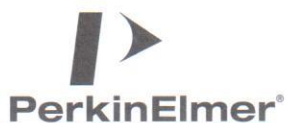

PerkinElmer, Inc.

U.S.A. Tel: 1-203-925-4600  
U.S.A. Toll Free: 1-800-762-4000

Visit [www.perkinelmer.com/lasoffices](http://www.perkinelmer.com/lasoffices) for a complete listing of our global offices.

## PerkinElmer Pure

PerkinElmer Number: N9303784  
 Element and Matrix: 1000 µg/mL Molybdenum in H<sub>2</sub>O  
 Starting Material: Ammonium Molybdate(VI) Tetrahydrate  
 Starting Material Lot No: 03201B  
 Density: 1.000 g/mL @ 20°C

Lot No: 25-55MOY1  
 Certification Date: JAN -- 2021  
 Expiration Date: JUL 30 2022

### Trace Metallic Impurities in the Actual Solution via ICP / ICP-MS Analysis:

| Element | µg/mL  |
|---------|--------|---------|--------|---------|--------|---------|--------|---------|--------|
| Ag      | <0.003 | Cu      | 0.003  | La      | <0.001 | Pt      | <0.001 | Tb      | <0.001 |
| Al      | 0.003  | Dy      | <0.001 | Li      | <0.001 | Rb      | <0.001 | Te      | 0.004  |
| As      | 0.03   | Er      | <0.001 | Lu      | <0.001 | Re      | 0.004  | Th      | <0.001 |
| Au      | <0.001 | Eu      | <0.001 | Mg      | <0.001 | Rh      | <0.001 | Ti      | 0.005  |
| B       | <0.002 | Fe      | <0.005 | Mn      | 0.006  | Ru      | 0.008  | Tl      | <0.001 |
| Ba      | 0.007  | Ga      | <0.001 | Na      | <0.01  | Sb      | <0.001 | Tm      | <0.001 |
| Be      | <0.001 | Gd      | <0.001 | Nb      | <0.001 | Sc      | <0.001 | U       | <0.001 |
| Bi      | <0.001 | Ge      | 0.001  | Nd      | <0.001 | Se      | <0.001 | V       | <0.001 |
| Ca      | 0.03   | Hf      | <0.001 | Ni      | <0.001 | Si      | <0.05  | W       | 0.07   |
| Cd      | <0.02  | Hg      | <0.001 | P       | <0.1   | Sm      | <0.001 | Y       | <0.001 |
| Ce      | 0.002  | Ho      | <0.001 | Pb      | <0.001 | Sn      | <0.001 | Yb      | <0.001 |
| Co      | <0.001 | In      | <0.001 | Pd      | 0.02   | Sr      | 0.002  | Zn      | <0.01  |
| Cr      | 0.004  | Ir      | <0.001 | Pr      | 0.002  | Ta      | <0.001 | Zr      | <0.001 |
| Cs      | <0.001 | K       | 0.03   |         |        |         |        |         |        |

### Traceability Documentation for Solution Standard:

Certified Value: 1001 µg/mL ±5 µg/mL (refer to side 2)  
 Certified Value is Traceable to: NIST SRM #3134  
 \* Classical Wet Assay: 1001 µg/mL  
 Method: Precipitation using 8-Hydroxy Quinoline. Filter, dry, and weigh as MoO<sub>2</sub>(C<sub>9</sub>H<sub>6</sub>NO)<sub>2</sub>.

\*Instrument Analysis using ICP Spectrometer: 1000 µg/mL  
 via NIST SRM #3134

We guarantee that our PerkinElmer Pure Atomic Spectroscopy Standards are stable and accurate to ±0.5% of certified concentration until the expiration date, provided the standards are kept tightly capped and stored under normal laboratory conditions. This value is the sum of cumulative errors associated with the analytical determinations, pipetting, and diluting to final volume. For these solutions we use high purity acids, ASTM Type 1 water (18 megohm double deionized), and leached, triple-rinsed bottles. All glassware used is class A.

Certifying Officer: Y. Parikh  
 Yogesh Parikh, Senior Spectroscopist

## PerkinElmer Pure Plus

PerkinElmer Number: N9303747  
 Element and Matrix: 1000 µg/mL Nickel in 2% HNO<sub>3</sub>  
 Starting Material: Nickel Metal  
 Starting Material Lot No: 07181F  
 Density: 1.011 g/mL @ 20°C

Lot No: CL12-43NIY1  
 Certification Date: NOV -- 2020  
 Expiration Date: MAY 30 2022

### Trace Metallic Impurities in the Actual Solution via ICP / ICP-MS Analysis:

| Element | µg/L  |
|---------|-------|---------|-------|---------|-------|---------|-------|---------|-------|
| Ag      | <0.06 | Cu      | <0.7  | La      | <0.04 | Pt      | <0.2  | Tb      | <0.01 |
| Al      | 0.9   | Dy      | <0.01 | Li      | <0.3  | Rb      | <0.3  | Te      | <0.5  |
| As      | 2     | Er      | <0.01 | Lu      | <0.01 | Re      | 0.2   | Th      | <0.02 |
| Au      | <0.09 | Eu      | <0.01 | Mg      | <0.4  | Rh      | <0.5  | Ti      | <0.4  |
| B       | <2    | Fe      | 3     | Mn      | <0.3  | Ru      | <0.2  | Tl      | <0.7  |
| Ba      | 0.02  | Ga      | <0.02 | Mo      | <0.6  | Sb      | 1     | Tm      | <0.01 |
| Be      | <0.4  | Gd      | <0.01 | Na      | 0.7   | Sc      | <0.6  | U       | <0.01 |
| Bi      | <0.03 | Ge      | <0.7  | Nb      | <0.02 | Se      | <30   | V       | <0.3  |
| Ca      | 3     | Hf      | <0.01 | Nd      | <0.05 | Si      | <100  | W       | <0.1  |
| Cd      | <0.2  | Hg      | <0.8  | P       | <500  | Sm      | <0.02 | Y       | <0.02 |
| Ce      | 0.06  | Ho      | <0.01 | Pb      | <0.01 | Sn      | <0.2  | Yb      | <0.01 |
| Co      | 5     | In      | <0.02 | Pd      | <0.1  | Sr      | <0.1  | Zn      | 1     |
| Cr      | 0.9   | Ir      | 0.6   | Pr      | <0.02 | Ta      | <0.05 | Zr      | <0.08 |
| Cs      | <0.04 | K       | 2     |         |       |         |       |         |       |

### Traceability Documentation for Solution Standard:

Certified Value: 998 µg/mL ±5 µg/mL (refer to side 2)  
 Certified Value is Traceable to: NIST SRM #3136  
 \* Classical Wet Assay: 997 µg/mL  
 Method: EDTA titration using Murexide as indicator. EDTA standardized against Pb(NO<sub>3</sub>)<sub>2</sub> NIST SRM #92  
 8

\*Instrument Analysis using ICP Spectrometer: 998 µg/mL  
 via NIST SRM #3136

We guarantee that our PerkinElmer Pure Plus Atomic Spectroscopy Standards are stable and accurate to ±0.5% of certified concentration until the expiration date, provided the standards are kept tightly capped and stored under normal laboratory conditions. This value is the sum of cumulative errors associated with the analytical determinations, pipetting, and diluting to final volume. For these solutions we use high purity acids, ASTM Type 1 water (18 megohm double deionized), and leached, triple-rinsed bottles. All glassware used is class A.

Certifying Officer: Y. Parikh  
 Yogesh Parikh, Senior Spectroscopist

PerkinElmer Pure

PerkinElmer Number: N9303789  
 Element and Matrix: 1000 µg/mL Palladium in 10% HCl  
 Starting Material: Palladium Metal  
 Starting Material Lot No: 04191D  
 Density: 1.021 g/mL @ 20°C

Lot No: 25-17PDY1  
 Certification Date: FEB - - 2021  
 Expiration Date: AUG 30 2022

Trace Metallic Impurities in the Actual Solution via ICP / ICP-MS Analysis:

| Element | µg/mL  |
|---------|--------|---------|--------|---------|--------|---------|--------|---------|--------|
| Ag      | 0.001  | Cu      | 0.001  | La      | <0.001 | Pt      | <0.001 | Tb      | <0.001 |
| Al      | 0.004  | Dy      | <0.001 | Li      | <0.001 | Rb      | <0.001 | Te      | <0.001 |
| As      | <0.003 | Er      | <0.001 | Lu      | <0.001 | Re      | <0.001 | Th      | <0.001 |
| Au      | 0.02   | Eu      | <0.001 | Mg      | 0.001  | Rh      | 0.002  | Ti      | <0.001 |
| B       | <0.001 | Fe      | 0.2    | Mn      | 0.001  | Ru      | <0.001 | Tl      | 0.002  |
| Ba      | <0.001 | Ga      | <0.001 | Mo      | 0.005  | Sb      | <0.001 | Tm      | <0.001 |
| Be      | <0.001 | Gd      | <0.001 | Na      | 0.009  | Sc      | <0.001 | U       | <0.001 |
| Bi      | <0.001 | Ge      | <0.001 | Nb      | <0.001 | Se      | <0.006 | V       | <0.001 |
| Ca      | 0.06   | Hf      | <0.001 | Nd      | <0.001 | Si      | <0.2   | W       | <0.001 |
| Cd      | <0.001 | Hg      | 0.005  | Ni      | 0.03   | Sm      | <0.001 | Y       | <0.001 |
| Ce      | <0.001 | Ho      | <0.001 | P       | <0.5   | Sn      | <0.001 | Yb      | <0.001 |
| Co      | <0.001 | In      | <0.001 | Pb      | 0.001  | Sr      | <0.001 | Zn      | 0.03   |
| Cr      | 0.02   | Ir      | <0.001 | Pr      | <0.001 | Ta      | <0.001 | Zr      | <0.001 |
| Cs      | <0.001 | K       | 0.008  |         |        |         |        |         |        |

Traceability Documentation for Solution Standard:

Certified Value: 998 µg/mL ±5 µg/mL (refer to side 2)  
 Certified Value is Traceable to: NIST SRM #3138  
 \* Classical Wet Assay: 998 µg/mL  
 Method: Precipitation using Glyoxime. Filter, dry, and weigh as Pd(C<sub>4</sub>H<sub>7</sub>O<sub>2</sub>N<sub>2</sub>)<sub>2</sub>

\*Instrument Analysis using ICP Spectrometer: 998 µg/mL  
 via NIST SRM #3138

We guarantee that our PerkinElmer Pure Atomic Spectroscopy Standards are stable and accurate to ±0.5% of certified concentration until the expiration date, provided the standards are kept tightly capped and stored under normal laboratory conditions. This value is the sum of cumulative errors associated with the analytical determinations, pipetting, and diluting to final volume. For these solutions we use high purity acids, ASTM Type 1 water (18 megohm double deionized), and leached, triple-rinsed bottles. All glassware used is class A.

Certifying Officer: Y. Parikh  
 Yogesh Parikh, Senior Spectroscopist

## PerkinElmer Pure

PerkinElmer Number: N9303791  
 Element and Matrix: 1000 µg/mL Platinum in 10% HCl  
 Starting Material: Platinum Metal  
 Starting Material Lot No: 06201F  
 Density: 1.021 g/mL @ 20°C

Lot No: 25-85PTY1  
 Certification Date: **APR - - 2021**  
 Expiration Date: **OCT 30 2022**

### Trace Metallic Impurities in the Actual Solution via ICP / ICP-MS Analysis:

| Element | µg/mL  |
|---------|--------|---------|--------|---------|--------|---------|--------|---------|--------|
| Ag      | 0.001  | Cu      | <0.001 | La      | <0.001 | Pr      | <0.001 | Tb      | <0.001 |
| Al      | 0.006  | Dy      | <0.001 | Li      | 0.2    | Rb      | <0.001 | Te      | <0.001 |
| As      | <0.001 | Er      | <0.001 | Lu      | <0.001 | Re      | <0.001 | Th      | <0.001 |
| Au      | 0.03   | Eu      | <0.001 | Mg      | <0.001 | Rh      | 0.008  | Ti      | <0.005 |
| B       | <0.005 | Fe      | 0.1    | Mn      | <0.001 | Ru      | <0.001 | Tl      | 0.006  |
| Ba      | <0.001 | Ga      | <0.001 | Mo      | 0.003  | Sb      | <0.001 | Tm      | <0.001 |
| Be      | <0.001 | Gd      | <0.001 | Na      | 0.1    | Sc      | <0.001 | U       | <0.001 |
| Bi      | 0.002  | Ge      | <0.001 | Nb      | <0.001 | Se      | 0.008  | V       | 0.002  |
| Ca      | 0.04   | Hf      | <0.001 | Nd      | <0.001 | Si      | <0.1   | W       | <0.001 |
| Cd      | <0.001 | Hg      | 0.004  | Ni      | 0.02   | Sm      | <0.001 | Y       | <0.001 |
| Ce      | <0.001 | Ho      | <0.001 | P       | <0.1   | Sn      | 0.004  | Yb      | <0.001 |
| Co      | <0.001 | In      | <0.001 | Pb      | 0.009  | Sr      | <0.001 | Zn      | 0.007  |
| Cr      | 0.03   | Ir      | 0.001  | Pd      | 0.009  | Ta      | <0.001 | Zr      | <0.001 |
| Cs      | <0.001 | K       | <0.5   |         |        |         |        |         |        |

### Traceability Documentation for Solution Standard:

**Certified Value:** 1002 µg/mL ±5 µg/mL (refer to side 2)  
**Certified Value is Traceable to:** NIST SRM #3140  
**\* Classical Wet Assay:** 1005 µg/mL  
**Method:** Precipitation using Ammonium Chloride. Filter, ignite, and weigh as Platinum metal.

**\*Instrument Analysis using ICP Spectrometer:** 999 µg/mL  
 via NIST SRM #3140

We guarantee that our PerkinElmer Pure Atomic Spectroscopy Standards are stable and accurate to ±0.5% of certified concentration until the expiration date, provided the standards are kept tightly capped and stored under normal laboratory conditions. This value is the sum of cumulative errors associated with the analytical determinations, pipetting, and diluting to final volume. For these solutions we use high purity acids, ASTM Type 1 water (18 megohm double deionized), and leached, triple-rinsed bottles. All glassware used is class A.

Certifying Officer: Y. Parikh  
 Yogesh Parikh, Senior Spectroscopist

PerkinElmer Pure

PerkinElmer Number: N9300171  
 Element and Matrix: 1000 µg/mL Silver in 2% HNO<sub>3</sub>  
 Starting Material: Silver nitrate  
 Starting Material Lot No: 11191B  
 Density: 1.010 g/mL @ 20°C

Lot No: 25-57AGY1  
 Certification Date: AUG - - 2021  
 Expiration Date: FEB 28 2023

Trace Metallic Impurities in the Actual Solution via ICP / ICP-MS Analysis:

| Element | µg/mL  |
|---------|--------|---------|--------|---------|--------|---------|--------|---------|--------|
| Al      | 0.005  | Dy      | <0.001 | Li      | <0.001 | Pt      | <0.001 | Tb      | <0.001 |
| As      | <0.001 | Er      | <0.001 | Lu      | <0.001 | Rb      | <0.001 | Te      | <0.002 |
| Au      | <0.001 | Eu      | <0.001 | Mg      | 0.001  | Re      | <0.001 | Th      | <0.001 |
| B       | 0.001  | Fe      | 0.004  | Mn      | <0.001 | Rh      | 0.01   | Ti      | <0.001 |
| Ba      | 0.001  | Ga      | <0.001 | Mo      | 0.004  | Ru      | <0.001 | Tl      | <0.005 |
| Be      | <0.001 | Gd      | <0.001 | Na      | 0.02   | Sb      | <0.001 | Tm      | <0.001 |
| Bi      | <0.001 | Ge      | <0.001 | Nb      | <0.001 | Sc      | <0.001 | U       | <0.001 |
| Ca      | 0.02   | Hf      | <0.001 | Nd      | <0.001 | Se      | <0.006 | V       | <0.001 |
| Cd      | <0.001 | Hg      | <0.001 | Ni      | <0.001 | Si      | <0.1   | W       | <0.001 |
| Ce      | <0.001 | Ho      | <0.001 | P       | <0.1   | Sm      | <0.001 | Y       | <0.001 |
| Co      | <0.001 | In      | <0.001 | Pb      | <0.001 | Sn      | 0.002  | Yb      | <0.001 |
| Cr      | <0.001 | Ir      | <0.001 | Pd      | 0.02   | Sr      | <0.001 | Zn      | 0.09   |
| Cs      | <0.001 | K       | 0.006  | Pr      | <0.001 | Ta      | <0.001 | Zr      | 0.1    |
| Cu      | <0.001 | La      | <0.001 |         |        |         |        |         |        |

Traceability Documentation for Solution Standard:

Certified Value: 1001 µg/mL ±5 µg/mL (refer to side 2)  
 Certified Value is Traceable to: NIST SRM #3151  
 \* Classical Wet Assay: 1000 µg/mL  
 Method: Precipitation using Hydrochloric Acid. Filter, dry, and weigh as AgCl.

\*Instrument Analysis using ICP Spectrometer: 1002 µg/mL  
 via NIST SRM #3151

We guarantee that our PerkinElmer Pure Atomic Spectroscopy Standards are stable and accurate to ±0.5% of certified concentration until the expiration date, provided the standards are kept tightly capped and stored under normal laboratory conditions. This value is the sum of cumulative errors associated with the analytical determinations, pipetting, and diluting to final volume. For these solutions we use high purity acids, ASTM Type 1 water (18 megohm double deionized), and leached, triple-rinsed bottles. All glassware used is class A.

Certifying Officer:

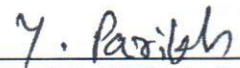  
 Yogesh Parikh, Senior Spectroscopist

## PerkinElmer Pure

PerkinElmer Number: N9300170  
 Element and Matrix: 1000 µg/mL Thallium in 2% HNO<sub>3</sub>  
 Starting Material: Thallium(I) Nitrate  
 Starting Material Lot No: 03191C  
 Density: 1.010 g/mL @ 20°C

Lot No: 25-29TLY1  
 Certification Date: **MAY - - 2021**  
 Expiration Date: **NOV 30 2022**

### Trace Metallic Impurities in the Actual Solution via ICP / ICP-MS Analysis:

| Element | µg/mL  |
|---------|--------|---------|--------|---------|--------|---------|--------|---------|--------|
| Ag      | 0.002  | Cu      | <0.001 | La      | <0.001 | Pr      | <0.001 | Ta      | <0.001 |
| Al      | <0.002 | Dy      | <0.001 | Li      | <0.002 | Pt      | <0.001 | Tb      | <0.001 |
| As      | <0.001 | Er      | <0.001 | Lu      | <0.001 | Rb      | <0.001 | Te      | <0.001 |
| Au      | <0.001 | Eu      | <0.001 | Mg      | <0.001 | Re      | <0.001 | Th      | <0.001 |
| B       | <0.001 | Fe      | 0.003  | Mn      | <0.001 | Rh      | <0.001 | Ti      | <0.001 |
| Ba      | <0.001 | Ga      | <0.001 | Mo      | <0.001 | Ru      | <0.001 | Tm      | <0.001 |
| Be      | <0.001 | Gd      | <0.001 | Na      | 0.007  | Sb      | <0.001 | U       | <0.001 |
| Bi      | <0.001 | Ge      | <0.001 | Nb      | <0.001 | Sc      | <0.001 | V       | <0.001 |
| Ca      | 0.007  | Hf      | <0.001 | Nd      | <0.001 | Se      | <0.001 | W       | <0.001 |
| Cd      | <0.001 | Hg      | <0.001 | Ni      | <0.001 | Si      | <0.05  | Y       | <0.001 |
| Ce      | <0.001 | Ho      | <0.001 | P       | <0.1   | Sm      | <0.001 | Yb      | <0.001 |
| Co      | <0.001 | In      | <0.001 | Pb      | <0.001 | Sn      | <0.001 | Zn      | 0.005  |
| Cr      | 0.001  | Ir      | <0.001 | Pd      | <0.001 | Sr      | <0.001 | Zr      | <0.001 |
| Cs      | <0.001 | K       | 0.04   |         |        |         |        |         |        |

### Traceability Documentation for Solution Standard:

Certified Value: 1000 µg/mL ±5 µg/mL (refer to side 2)  
 Certified Value is Traceable to: NIST SRM #3158  
 \* Classical Wet Assay: 1001 µg/mL  
 Method: Precipitation using Potassium Chromate. Filter, dry, and weigh as Ti<sub>2</sub>CrO<sub>4</sub>

\*Instrument Analysis using ICP Spectrometer: 999 µg/mL  
 via NIST SRM #3158

We guarantee that our PerkinElmer Pure Atomic Spectroscopy Standards are stable and accurate to ±0.5% of certified concentration until the expiration date, provided the standards are kept tightly capped and stored under normal laboratory conditions. This value is the sum of cumulative errors associated with the analytical determinations, pipetting, and diluting to final volume. For these solutions we use high purity acids, ASTM Type 1 water (18 megohm double deionized), and leached, triple-rinsed bottles. All glassware used is class A.

Certifying Officer: Y. Parikh  
 Yogesh Parikh, Senior Spectroscopist

PerkinElmer Pure

PerkinElmer Number: N9303808  
 Element and Matrix: 1000 µg/mL Vanadium in 2% HNO<sub>3</sub>  
 Starting Material: Ammonium Metavanadate(V)  
 Starting Material Lot No: 01181C  
 Density: 1.012 g/mL @ 20°C

Lot No: 25-30VY1  
 Certification Date: SEP -- 2020  
 Expiration Date: MAR 30 2022

Trace Metallic Impurities in the Actual Solution via ICP / ICP-MS Analysis:

| Element | µg/mL  |
|---------|--------|---------|--------|---------|--------|---------|--------|---------|--------|
| Ag      | <0.001 | Cu      | <0.001 | La      | <0.001 | Pr      | <0.001 | Ta      | <0.001 |
| Al      | 0.003  | Dy      | <0.001 | Li      | <0.001 | Pt      | <0.001 | Tb      | <0.001 |
| As      | <0.001 | Er      | <0.001 | Lu      | <0.001 | Rb      | <0.001 | Te      | <0.001 |
| Au      | <0.001 | Eu      | <0.001 | Mg      | 0.004  | Re      | <0.001 | Th      | <0.001 |
| B       | <0.003 | Fe      | 0.06   | Mn      | 0.003  | Rh      | <0.001 | Ti      | <0.002 |
| Ba      | 0.001  | Ga      | <0.001 | Mo      | 0.003  | Ru      | <0.001 | Tl      | 0.02   |
| Be      | <0.001 | Gd      | <0.001 | Na      | 0.02   | Sb      | <0.001 | Tm      | <0.001 |
| Bi      | <0.001 | Ge      | <0.001 | Nb      | <0.001 | Sc      | <0.001 | U       | <0.001 |
| Ca      | 0.03   | Hf      | <0.001 | Nd      | <0.001 | Se      | <0.08  | W       | <0.001 |
| Cd      | <0.001 | Hg      | <0.001 | Ni      | 0.002  | Si      | <0.1   | Y       | <0.001 |
| Ce      | <0.001 | Ho      | <0.001 | P       | <0.2   | Sm      | <0.001 | Yb      | <0.001 |
| Co      | <0.001 | In      | <0.001 | Pb      | 0.003  | Sr      | <0.001 | Zn      | 0.003  |
| Cr      | 0.006  | Ir      | <0.001 | Pd      | <0.001 |         |        | Zr      | 0.001  |
| Cs      | 0.004  | K       | 0.02   |         |        |         |        |         |        |

Traceability Documentation for Solution Standard:

Certified Value: 999 µg/mL ±5 µg/mL (refer to side 2)  
 Certified Value is Traceable to: NIST SRM #3165  
 \* Classical Wet Assay: 997 µg/mL  
 Method: Evaporate to dryness. Fume with Nitric acid. Ignite and weigh as V<sub>2</sub>O<sub>5</sub>.

\*Instrument Analysis using ICP Spectrometer: 1001 µg/mL  
 via NIST SRM #3165

We guarantee that our PerkinElmer Pure Atomic Spectroscopy Standards are stable and accurate to ±0.5% of certified concentration until the expiration date, provided the standards are kept tightly capped and stored under normal laboratory conditions. This value is the sum of cumulative errors associated with the analytical determinations, pipetting, and diluting to final volume. For these solutions we use high purity acids, ASTM Type 1 water (18 megohm double deionized), and leached, triple-rinsed bottles. All glassware used is class A.

Certifying Officer: Y. Parikh  
 Yogesh Parikh, Senior Spectroscopist

## PerkinElmer Pure Plus

PerkinElmer Number: N9303758  
 Element and Matrix: 1000 µg/mL Zinc in 2% HNO<sub>3</sub>  
 Starting Material: Zinc Metal  
 Starting Material Lot No: 09161G  
 Density: 1.011 g/mL @ 20°C

Lot No: CL11-196ZNY1  
 Certification Date: OCT - - 2020  
 Expiration Date: APR 30 2022

### Trace Metallic Impurities in the Actual Solution via ICP / ICP-MS Analysis:

| Element | µg/L  |
|---------|-------|---------|-------|---------|-------|---------|-------|---------|-------|
| Ag      | <0.4  | Cu      | <0.2  | La      | <0.03 | Pr      | <0.01 | Ta      | <0.05 |
| Al      | 2     | Dy      | <0.01 | Li      | 0.2   | Pt      | <0.2  | Tb      | <0.01 |
| As      | <0.1  | Er      | <0.01 | Lu      | <0.01 | Rb      | <0.09 | Te      | 0.6   |
| Au      | <0.05 | Eu      | <0.01 | Mg      | <0.3  | Re      | <0.05 | Th      | <0.02 |
| B       | <0.3  | Fe      | <0.2  | Mn      | 0.7   | Rh      | <0.6  | Ti      | 0.3   |
| Ba      | <0.06 | Ga      | 0.2   | Mo      | <0.3  | Ru      | <0.3  | Tl      | <0.5  |
| Be      | <0.2  | Gd      | <0.03 | Na      | 4     | Sb      | <0.3  | Tm      | <0.01 |
| Bi      | 0.06  | Ge      | 0.01  | Nb      | <0.07 | Sc      | <0.3  | U       | <0.01 |
| Ca      | <4    | Hf      | <0.01 | Nd      | <0.01 | Se      | <10   | V       | <0.1  |
| Cd      | 3     | Hg      | <0.2  | Ni      | 0.2   | Si      | <100  | W       | <0.2  |
| Ce      | <0.02 | Ho      | <0.01 | P       | <200  | Sm      | <0.01 | Y       | <0.02 |
| Co      | <0.2  | In      | <0.08 | Pb      | 1     | Sn      | 0.2   | Yb      | <0.01 |
| Cr      | <0.5  | Ir      | <0.2  | Pd      | <0.2  | Sr      | <0.04 | Zr      | 0.04  |
| Cs      | <0.08 | K       | 0.5   |         |       |         |       |         |       |

### Traceability Documentation for Solution Standard:

Certified Value: 1000 µg/mL ±5 µg/mL (refer to side 2)  
 Certified Value is Traceable to: NIST SRM #3168a  
 \* Classical Wet Assay: 999 µg/mL  
 Method: EDTA titration using Eriochrome Black-T as indicator. EDTA standardized against Pb(NO<sub>3</sub>)<sub>2</sub> NIST SRM #928.

\*Instrument Analysis using ICP Spectrometer: 1000 µg/mL  
 via NIST SRM #3168a

We guarantee that our PerkinElmer Pure Plus Atomic Spectroscopy Standards are stable and accurate to ±0.5% of certified concentration until the expiration date, provided the standards are kept tightly capped and stored under normal laboratory conditions. This value is the sum of cumulative errors associated with the analytical determinations, pipetting, and diluting to final volume. For these solutions we use high purity acids, ASTM Type 1 water (18 megohm double deionized), and leached, triple-rinsed bottles. All glassware used is class A.

Certifying Officer: Y. Parikh  
 Yogesh Parikh, Senior Spectroscopist

## PerkinElmer Pure

PerkinElmer Number: N9300207  
 Element and Matrix: 1000 µg/mL Antimony in H<sub>2</sub>O/0.6% Tart.Acid/Tr.HNO<sub>3</sub>  
 Starting Material: Antimony Metal  
 Starting Material Lot No: 05171E  
 Density: 1.001 g/mL @ 20°C

Lot No: 25-80SBY1  
 Certification Date: APR - - 2021  
 Expiration Date: OCT 30 2022

### Trace Metallic Impurities in the Actual Solution via ICP / ICP-MS Analysis:

| Element | µg/mL  |
|---------|--------|---------|--------|---------|--------|---------|--------|---------|--------|
| Ag      | <0.001 | Cu      | <0.001 | La      | 0.02   | Pr      | <0.001 | Tb      | <0.001 |
| Al      | 0.006  | Dy      | 0.002  | Li      | <0.001 | Pt      | <0.001 | Te      | <0.001 |
| As      | <0.001 | Er      | <0.001 | Lu      | <0.001 | Rb      | <0.001 | Th      | <0.001 |
| Au      | <0.001 | Eu      | <0.001 | Mg      | 0.001  | Re      | <0.001 | Ti      | <0.001 |
| B       | <0.003 | Fe      | 0.006  | Mn      | <0.001 | Rh      | <0.001 | Tl      | <0.001 |
| Ba      | 0.002  | Ga      | <0.001 | Mo      | <0.001 | Ru      | <0.001 | Tm      | <0.001 |
| Be      | <0.001 | Gd      | <0.001 | Na      | 0.006  | Sc      | <0.001 | U       | <0.001 |
| Bi      | <0.001 | Ge      | <0.001 | Nb      | <0.001 | Se      | <0.01  | V       | <0.001 |
| Ca      | 0.01   | Hf      | <0.001 | Nd      | <0.001 | Si      | <0.2   | W       | <0.001 |
| Cd      | <0.001 | Hg      | <0.001 | Ni      | <0.001 | Sm      | <0.001 | Y       | <0.001 |
| Ce      | <0.001 | Ho      | <0.001 | P       | <0.2   | Sn      | <0.001 | Yb      | <0.001 |
| Co      | <0.001 | In      | <0.001 | Pb      | <0.001 | Sr      | <0.001 | Zn      | 0.005  |
| Cr      | <0.001 | Ir      | <0.001 | Pd      | <0.001 | Ta      | <0.001 | Zr      | <0.001 |
| Cs      | <0.001 | K       | 0.02   |         |        |         |        |         |        |

### Traceability Documentation for Solution Standard:

Certified Value: 999 µg/mL ±5 µg/mL (refer to side 2)  
 Certified Value is Traceable to: NIST SRM #3102a  
 \* Classical Wet Assay: 997 µg/mL  
 Method: Evaporate to dryness. Fume with Nitric Acid. Ignite and weigh as Sb<sub>2</sub>O<sub>4</sub>.

\*Instrument Analysis using ICP Spectrometer: 1000 µg/mL  
 via NIST SRM #3102a

We guarantee that our PerkinElmer Pure Atomic Spectroscopy Standards are stable and accurate to ±0.5% of certified concentration until the expiration date, provided the standards are kept tightly capped and stored under normal laboratory conditions. This value is the sum of cumulative errors associated with the analytical determinations, pipetting, and diluting to final volume. For these solutions we use high purity acids, ASTM Type 1 water (18 megohm double deionized), and leached, triple-rinsed bottles. All glassware used is class A.

Certifying Officer: Y. Parikh  
 Yogesh Parikh, Senior Spectroscopist
