# Supplementary material for: Advances in the Characterization of Usnea barbata (L.) Weber ex F.H. Wigg from Călimani Mountains, Romania
Source: MDPI journal article supplement (doi:10.3390/app12094234), 2022-04-22
Supplement: s1 [file s1 › ICP-MS Tables S1¿CS5.pdf]

**Table S1.** Dried *U. barbata* samples digestion conditions for ICP-MS mineral analysis

| Step              | Temperature (°C) | Power of microwave digestion system (W) | Time (min) | Fan level |
|-------------------|------------------|-----------------------------------------|------------|-----------|
| <b>Power ramp</b> | -                | 1450                                    | 15         | 1         |
| <b>Power hold</b> | 180              | 1450                                    | 45         | 1         |
| <b>Cooling</b>    | 70               | 0                                       | -          | 3         |

For calibration standard solutions (Cal.Std.) preparation, the suitable standard solutions are registered in Table S2.

**Table S2.** ICP-MS Standard solutions

| Solution                                                       | Concentration | Manufacturer |
|----------------------------------------------------------------|---------------|--------------|
| Arsenic Standard Solution                                      | 1000 µg/mL    | Perkin Elmer |
| Lead Standard Solution                                         | 1000 µg/mL    | Perkin Elmer |
| Cadmium Standard Solution                                      | 1000 µg/mL    | Perkin Elmer |
| Mercury Standard Solution                                      | 10 µg/mL      | Perkin Elmer |
| Aluminium Standard Solution                                    | 1000 µg/mL    | Perkin Elmer |
| Calcium Standard Solution                                      | 1000 µg/mL    | Perkin Elmer |
| Iron Standard Solution                                         | 1000 µg/mL    | Perkin Elmer |
| Magnesium Standard Solution                                    | 1000 µg/mL    | Perkin Elmer |
| Manganese Standard Solution                                    | 1000 µg/mL    | Perkin Elmer |
| Zinc Standard Solution                                         | 1000 µg/mL    | Perkin Elmer |
| Silver Standard Solution                                       | 1000 µg/mL    | Perkin Elmer |
| Barium Standard Solution                                       | 1000 µg/mL    | Perkin Elmer |
| Cobalt Standard Solution                                       | 1000 µg/mL    | Perkin Elmer |
| Chromium Standard Solution                                     | 1000 µg/mL    | Perkin Elmer |
| Cooper Standard Solution                                       | 1000 µg/mL    | Perkin Elmer |
| Lithium Standard Solution                                      | 1000 µg/mL    | Perkin Elmer |
| Nickel Standard Solution                                       | 1000 µg/mL    | Perkin Elmer |
| Thallium Standard Solution                                     | 1000 µg/mL    | Perkin Elmer |
| Vanadium Standard Solution                                     | 1000 µg/mL    | Perkin Elmer |
| Molybdenum Standard Solution                                   | 1000 µg/mL    | Perkin Elmer |
| Palladium Standard Solution                                    | 1000 µg/mL    | Perkin Elmer |
| Platinum Standard Solution                                     | 1000 µg/mL    | Perkin Elmer |
| Antimony Standard Solution                                     | 1000 µg/mL    | Perkin Elmer |
| NexION Setup Solution (Be, Ce, Fe, In, Li, Mg, Pb, U)          | 1 µg/L        | Perkin Elmer |
| NexION KED Mode Setup Solution (Be, Ce, Fe, In, Li, Mg, Pb, U) | 1 µg/L        | Perkin Elmer |

Four intermediary stock solutions (Sol. I – Sol. IV) were prepared as follows:

Sol. I (As, Pb, Cd, Hg) 1 mg/L: In a 20 mL volumetric flask were added: 0.2 mL 65% HNO<sub>3</sub>, 0.02 mL solution As 1000 mg / L, 0.02 mL solution Pb 1000 mg / L, 0.02 mL solution Cd 1000 mg / L and 2 mL solution Hg 10 mg / L; then, the obtained solution was brought to the mark with ultrapure water.

Sol. II (Ca, Fe, Mg, Mn, Zn) 10 mg/L: In a 50 mL volumetric flask were added: 0.5 mL 65% HNO<sub>3</sub>, 0.5 mL solution Ca 1000 mg / L, 0.5 mL solution Fe 1000 mg / L, 0.5 mL solution Mg 1000 mg / L, 0.5 mL solution Mn 1000 mg / L and 0.5 mL solution Zn 1000 mg / L; then, the flask content was brought to the mark with ultrapure water.

Sol. III (Al) 10 mg/L: In a 50 mL volumetric flask were added 0.5 mL 65% HNO<sub>3</sub>, 0.5 mL solution Al 1000 mg/L, and ultrapure water up to the mark.

Sol. IV (Ag, Ba, Co, Cr, Cu, Li, Ni, Tl, V, Mo, Pd, Pt, Sb) 1 mg/L: In a 50 mL volumetric flask were added: 0.5 mL 65% HNO<sub>3</sub>, 0.05 mL solution Ag 1000 mg / L, 0.05 mL solution Ba 1000 mg / L, 0.05 mL solution Co 1000 mg / L, 0.05 mL solution Cr 1000 mg / L, 0.05 mL solution Cu, 0.05 mL solution Li 1000 mg / L, 0.05 mL solution Ni 1000 mg / L, 0.05 mL solution Tl 1000 mg / L, 0.05 mL solution V 1000 mg / L, 0.05 mL solution Mo 1000 mg / L, 0.05 mL solution Pd 1000 mg / L, 0.05 mL solution Pt 1000 mg / L and 0.05 mL solution Sb 1000 mg / L; then, the obtained solution was brought to the mark with ultrapure water.

The four intermediate stock solutions (Sol. I – Sol. IV) were used for Cal.Std. Solutions (E1-E5) preparation. Thus, in each 25 mL volumetric flask were added 4 mL 65% HNO<sub>3</sub>, different volumes (mL) of Sol. I – Sol. IV (as registered in table S4) and ultrapure water up to the mark.

**Table S3.** Preparation of calibration standard solutions (E1-E5)

| Solution             | E1    | E2    | E3    | E4    | E5    |
|----------------------|-------|-------|-------|-------|-------|
| Volume (mL)          |       |       |       |       |       |
| 65% HNO <sub>3</sub> | 4.000 | 4.000 | 4.000 | 4.000 | 4.000 |
| Sol. I               | 0.025 | 0.125 | 0.250 | 0.375 | 0.625 |
| Sol. II              | 0.125 | 0.250 | 0.500 | 0.750 | 1.250 |
| Sol. III             | 0.025 | 0.125 | 0.250 | 0.375 | 0.500 |
| Sol. IV              | 0.025 | 0.125 | 0.250 | 1.250 | 2.500 |

**Table S4.** Concentrations of calibration standard solutions (E1-E5) for different elements

| Element                                          | E1 ( µg/L) | E2 ( µg/L) | E3 ( µg/L) | E4 ( µg/L) | E5 ( µg/L) |
|--------------------------------------------------|------------|------------|------------|------------|------------|
| As, Pb, Cd, Hg                                   | 1          | 5          | 10         | 15         | 25         |
| Ca, Fe, Mg, Mn, Zn                               | 50         | 100        | 200        | 300        | 500        |
| Al                                               | 10         | 50         | 100        | 150        | 200        |
| Ag, Ba, Co, Cr, Cu, Li, Ni, Tl, V, Mo, Pd, P, Sb | 1          | 5          | 10         | 50         | 100        |

**Table S5.** Calibration Curve Range, R<sup>2</sup>, LOD, and LOQ (µg/L and µg/g ) for each element.

| Element | m/z | Calibration Curve Range |           | R <sup>2</sup> | LOD   |       | LOQ estimated value |       |
|---------|-----|-------------------------|-----------|----------------|-------|-------|---------------------|-------|
|         |     | µg/L                    | µg/g      |                | µg/L  | µg/g  | µg/L                | µg/g  |
| Ag      | 107 | 1 – 100                 | 0.1 – 10  | 0.999997       | 0,058 | 0,006 | 1,000               | 0,100 |
| Al      | 27  | 10 – 200                | 1 – 20    | 0.999872       | 2,863 | 0,286 | 10,00               | 1,000 |
| As      | 75  | 1 – 25                  | 0.1 – 2.5 | 0.999861       | 0,345 | 0,035 | 1,000               | 0,100 |
| Ba      | 138 | 1 – 100                 | 0.1 – 10  | 0.999992       | 0,067 | 0,007 | 1,000               | 0,100 |

|           |     |          |           |          |       |       |       |       |
|-----------|-----|----------|-----------|----------|-------|-------|-------|-------|
| <b>Ca</b> | 43  | 50 – 500 | 5 – 50    | 0.996738 | 4,924 | 0,492 | 50,00 | 5,000 |
| <b>Cd</b> | 111 | 1 – 25   | 0.1 – 2.5 | 0.999853 | 0,147 | 0,015 | 1,000 | 0,100 |
| <b>Co</b> | 59  | 1 – 100  | 0.1 – 10  | 0.999982 | 0,060 | 0,006 | 1,000 | 0,100 |
| <b>Cr</b> | 52  | 1 – 100  | 0.1 – 10  | 0.999976 | 0,090 | 0,009 | 1,000 | 0,100 |
| <b>Cu</b> | 63  | 1 – 100  | 0.1 – 10  | 0.999995 | 0,057 | 0,006 | 1,000 | 0,100 |
| <b>Fe</b> | 57  | 50 – 500 | 5 – 50    | 0.998754 | 3,392 | 0,339 | 50,00 | 5,000 |
| <b>Li</b> | 7   | 1 – 100  | 0.1 – 10  | 0.999932 | 0,198 | 0,020 | 1,000 | 0,100 |
| <b>Mg</b> | 24  | 50 – 500 | 5 – 50    | 0.999858 | 2,523 | 0,252 | 50,00 | 5,000 |
| <b>Mn</b> | 55  | 50 – 500 | 5 – 50    | 0.999801 | 1,911 | 0,191 | 50,00 | 5,000 |
| <b>Ni</b> | 60  | 1 – 100  | 0.1 – 10  | 0.999986 | 0,096 | 0,010 | 1,000 | 0,100 |
| <b>Pb</b> | 208 | 1 – 25   | 0.1 – 2.5 | 0.999646 | 0,053 | 0,005 | 1,000 | 0,100 |
| <b>Tl</b> | 205 | 1 – 100  | 0.1 – 10  | 0.999985 | 0,025 | 0,002 | 1,000 | 0,100 |
| <b>V</b>  | 51  | 1 – 100  | 0.1 – 10  | 0.999991 | 0,103 | 0,010 | 1,000 | 0,100 |
| <b>Zn</b> | 66  | 50 – 500 | 5 – 50    | 0.999791 | 1,996 | 0,200 | 50,00 | 5,000 |
| <b>Hg</b> | 202 | 1 – 25   | 0.1 – 2.5 | 0.999751 | 0,198 | 0,020 | 1,000 | 0,100 |
| <b>Mo</b> | 98  | 1 – 100  | 0.1 – 10  | 0.999995 | 0,097 | 0,010 | 1,000 | 0,100 |
| <b>Pd</b> | 106 | 1 – 100  | 0.1 – 10  | 0.999998 | 0,064 | 0,006 | 1,000 | 0,100 |
| <b>Pt</b> | 195 | 1 – 100  | 0.1 – 10  | 0.999998 | 0,027 | 0,003 | 1,000 | 0,100 |
| <b>Sb</b> | 121 | 1 – 100  | 0.1 – 10  | 0.999984 | 0,138 | 0,014 | 1,000 | 0,100 |

m/z - mass-to-charge ratio, LOD – Detection limit, LOQ – Quantification limit,  $R^2$  – correlation coefficient

**Figure S2** represents the calibration curves for 23 elements in ICP-MS analysis, where:

- Apparent concentration is each (E1-E5) calibration standard solution concentration ( $\mu\text{g/L}$ )
  - Net intensity is the intensity of the signal received by the ICP detector, corresponding to the number of metal ions striking the detector every second (measured in count per second = CPS) from each (E1-E5) calibration standard solution
  - Eqn.=linear equation
  - Cor.Coeff.= coefficient of correlation ( $R^2$ )
  - BEC = background equivalent concentration ( $\mu\text{g/L}$ )
  - DL=detection limit or limit of detection (LOD,  $\mu\text{g/L}$ )
- ([https://resources.perkinelmer.com/labsolutions/resources/docs/WHP\\_Atomic\\_Spectroscopy-Effects\\_on\\_Accuracy\\_and\\_Detection\\_Limits\\_013559\\_01.pdf](https://resources.perkinelmer.com/labsolutions/resources/docs/WHP_Atomic_Spectroscopy-Effects_on_Accuracy_and_Detection_Limits_013559_01.pdf))
