# Supplementary figures and images for: Advances in the Characterization of Usnea barbata (L.) Weber ex F.H. Wigg from Călimani Mountains, Romania
Source: MDPI journal article supplement (doi:10.3390/app12094234), 2022-04-22

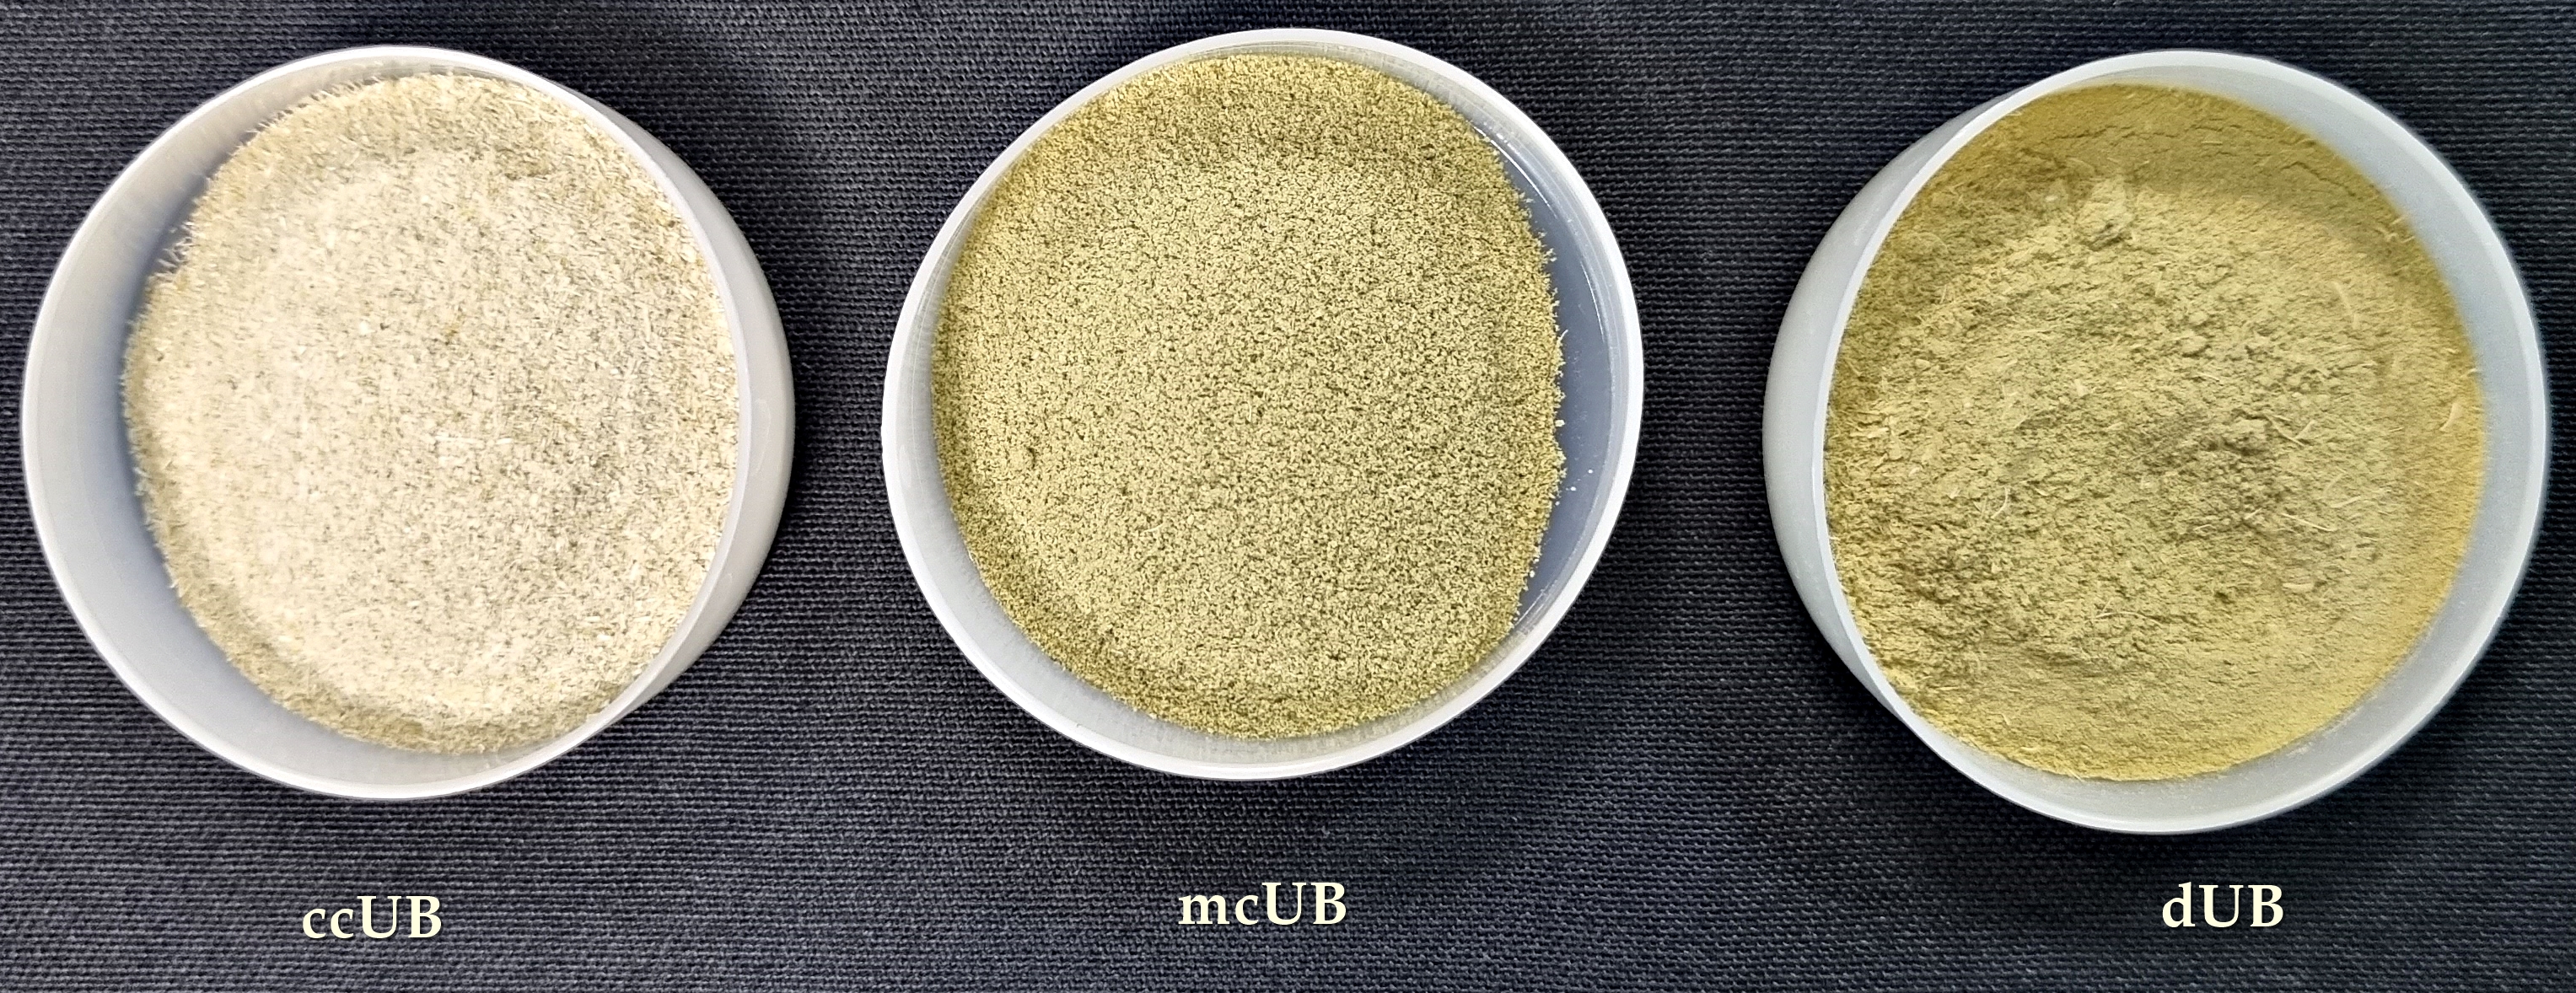

Supplement: s1 [file s1 › Figure S1.jpg]
